# Supplementary material
Source: PubMed Central journal article supplement (PMC2742884)

# Supporting Information

## Synthesis of Sultam Scaffolds via Intramolecular Oxa-Michael and Diastereoselective Baylis Hillman Reactions

Aihua Zhou and Paul R. Hanson

*Department of Chemistry, University of Kansas, 1251 Wescoe Hall Drive, Lawrence, KS 66045-7582 and the Center for the Chemical Methodologies and Library Development at The University of Kansas*

phanson@ku.edu

### Table of Contents

General Experimental Methods: *SI-1*

Experimental Section and Characterization Data: *SI-2* to *SI-26*

<sup>1</sup>H, <sup>13</sup>C-NMR Spectra for New Compounds: *SI-26* to *SI-90*

2D-NMR Spectra for Representative Compounds: *SI-90* to *SI-98*

### General Experimental Methods

All reactions were carried out under argon atmosphere. Stirring was achieved with oven-dried magnetic stir bars. Et<sub>2</sub>O, toluene, THF and CH<sub>2</sub>Cl<sub>2</sub> were purified by passage through the Solv-Tek purification system employing activated Al<sub>2</sub>O<sub>3</sub> (Grubbs, R. H.; Rosen, R. K.; Timmers, F. J. *Organometallics* **1996**, *15*, 1518-1520). Et<sub>3</sub>N was purified by passage over basic alumina and stored over KOH. Butyl lithium was purchased from Aldrich and titrated prior to use. Protected glycidol ethers were acquired from Daiso Co., Ltd., Fine Chemical Department. Flash column chromatography was performed with Sorbent Technologies silica gel (30930M-25, Silica Gel 60A, 40-63 μm). Thin layer chromatography was performed on silica gel 60F254 plates (EM-5717, Merck). Deuterated solvents were purchased from Cambridge Isotope laboratories. <sup>1</sup>H, <sup>13</sup>C NMR spectra were recorded on a Bruker DRX-400 spectrometer operating at 400 MHz, 100 MHz respectively. Observed rotations at 589 nm were measured using AUTOPOL IV Model automatic polarimeter. High-resolution mass spectrometry (HRMS) was recorded on an LCT Premier Spectrometer (Micromass UK Limited) operating on ESI (MeOH).

## Experimental Data and Characterization Data

### General 3-step protocol to generate vinyl sulfonamides 3a-k.

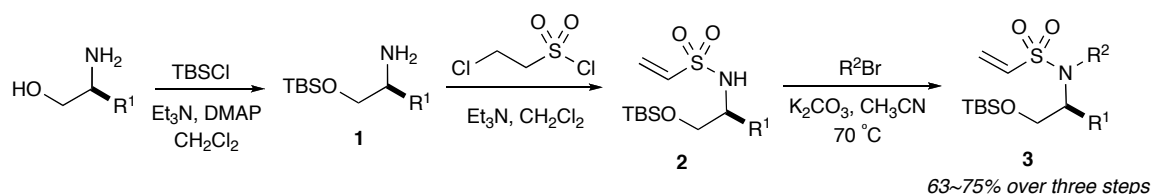

2-Chloroethanesulfonyl chloride (1.0 equiv.) was added drop wise to a stirred solution of TBS-protected amino alcohol<sup>1</sup> (1.0 equiv.) with  $\text{Et}_3\text{N}$  (3.5 equiv.) in  $\text{CH}_2\text{Cl}_2$  (5 ml) at  $0^\circ\text{C}$ . After addition, stirring was continued at  $0^\circ\text{C}$  for 2 hrs. The mixture then was diluted with  $\text{CH}_2\text{Cl}_2$  (5 ml) washed with brine, dried ( $\text{MgSO}_4$ ), concentrated under reduced pressure and carried on without further purification. The crude mixture was dissolved in  $\text{CH}_3\text{CN}$  (about 0.5 M solution), 2-bromobenzylbromide (1.05 equiv.) and  $\text{K}_2\text{CO}_3$  (2.0 equiv.) were added and the mixture was heated to  $80^\circ\text{C}$  for 2-5 hrs (reaction was monitored by TLC). The reaction was cooled to rt, filtered and concentrated under reduced pressure.

The crude products **3a-k** were purified by flash column chromatography (Hexane/EtOAc = 8:1) to yield product in a yield of 63-75% over three steps as colorless oil. The crude residues **3d-g** were directly used for next reactions to make sultams **4d-g**.

### (S)-N-Allyl-N-(1-(tert-butyldimethylsilyloxy)-3-methylbutan-2-yl)ethenesulfonamide (3a)

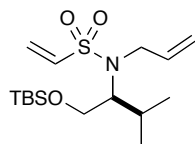

2-Chloroethanesulfonyl chloride (163 mg, 1.0 equiv.) was added drop wise to a stirred solution of TBS-protected amino alcohol (217 mg, 1.0 equiv.) with  $\text{Et}_3\text{N}$  (353.5 mg, 3.5 equiv.) in  $\text{CH}_2\text{Cl}_2$  (5 ml) at  $0^\circ\text{C}$ . After addition, stirring was continued at  $0^\circ\text{C}$  for 2 hrs. The mixture then was diluted with  $\text{CH}_2\text{Cl}_2$  (5 ml) washed with brine (2x4 ml), dried ( $\text{MgSO}_4$ ), concentrated under reduced pressure and carried on without further purification. The crude mixture was

[1] TBS-protected amino alcohol, see Isobe, T.; Fukuda, K.; Yamaguchi, K.; Seki, H.; Tokunaga, T.; Ishikawa, T. *J. Org. Chem.* **2000**, *65*, 7779-7785.

dissolved in CH<sub>3</sub>CN (about 0.5 M solution), 2-bromobenzylbromide (262.5 mg, 1.05 equiv.) and K<sub>2</sub>CO<sub>3</sub> (276 mg, 2.0 equiv.) were added and the mixture was heated to 80 °C for 2-5 hrs (reaction was monitored by TLC). The reaction was cooled to rt, filtered and concentrated under reduced pressure. The crude products **3a** was purified by flash column chromatography (Hexane/EtOAc = 8:1) to yield product in a yield of 72% (250 mg) over three steps as colorless oil.

$[\alpha]^{23}_{\text{D}}$  -38.6 (c 3.80, CH<sub>2</sub>Cl<sub>2</sub>) Colorless oil;

**FTIR** (neat): 2960, 1470, 1342, 1105, 838 cm<sup>-1</sup>;

**<sup>1</sup>H-NMR** (CDCl<sub>3</sub>, 400 MHz):  $\delta$  (ppm) 6.54 (dd,  $J = 16.8, 10.0$  Hz, 1H), 6.14 (d,  $J = 16.8$  Hz, 1H), 5.94 (dddd,  $J = 17.2, 10.0, 8.0, 6.0$  Hz, 1H), 5.79 (d,  $J = 10.0$  Hz, 1H), 5.20 (d,  $J = 17.2$  Hz, 1H), 5.11 (d,  $J = 10.0$  Hz, 1H), 3.87 (dd,  $J = 16.0, 7.6$  Hz, 1H), 3.83-3.70 (m, 3H), 3.44 (ddd,  $J = 10.5, 7.1, 3.6$  Hz, 1H), 1.89 (m, 1H), 1.02 (d,  $J = 6.8$  Hz, 3H), 0.95 (d,  $J = 6.4$  Hz, 3H), 0.92 (s, 9H), 0.08 (s, 6H);

**<sup>13</sup>C-NMR** (CDCl<sub>3</sub>, 100 MHz):  $\delta$  (ppm) 137.1, 135.8, 124.5, 117.3, 66.2, 62.7, 47.3, 28.0, 25.9 (3), 20.8, 20.2, 18.3, -5.5, -5.6;

**HRMS** m/z Calculated for C<sub>16</sub>H<sub>33</sub>NO<sub>3</sub>SiSNa 370.1848 (M+Na)<sup>+</sup>, found 370.1820.

**(S)-N-(2-Bromobenzyl)-N-(1-(tert-butylidimethylsilyloxy)-3-phenylpropan-2-yl)ethanesulfonamide (3b)**

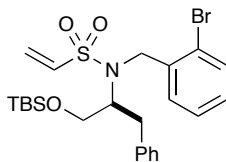

$[\alpha]^{23}_{\text{D}}$  -27.9 (c 0.90, CH<sub>2</sub>Cl<sub>2</sub>) Colorless oil;

**FTIR** (neat): 2952, 1454, 1338, 1147, 837, 777 cm<sup>-1</sup>;

**<sup>1</sup>H-NMR** (CDCl<sub>3</sub>, 400 MHz):  $\delta$  (ppm) 7.80-7.15 (aromatic H, 9H), 6.16 (overlap, 2H), 5.76 (dd,  $J = 7.6, 1.2$  Hz, 1H), 4.56 (d,  $J = 3.6$  Hz, 2H), 4.17 (m, 1H), 3.70 (dd,  $J = 10.8, 6.8$  Hz, 1H), 3.54 (d,  $J = 11.2, 5.2$  Hz, 1H), 2.95 (dd,  $J = 14.0, 6.8$  Hz, 1H), 2.80 (dd,  $J = 14.0, 6.8$  Hz, 1H), 0.89 (s, 9H), 0.02 (s, 3H), -0.01 (s, 3H);

**<sup>13</sup>C-NMR** (CDCl<sub>3</sub>, 100 MHz):  $\delta$  (ppm) 138.2, 137.3, 135.3, 132.4, 130.3, 129.3, 128.9, 128.7, 127.6, 126.8, 126.0, 122.3, 63.4, 62.6, 48.3, 37.0, 25.9(3), 18.2, -5.5(2);

**HRMS** m/z Calculated for C<sub>24</sub>H<sub>34</sub>NO<sub>3</sub>SiSBrNa 546.1110 (M+Na)<sup>+</sup>, found 546.1100.

***N*-Allyl-*N*-(3-(*tert*-butyldimethylsilyloxy)propyl)ethanesulfonamide (3c)**

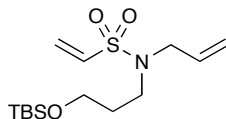

**FTIR** (neat): 2954, 1346, 1097, 847, 777  $\text{cm}^{-1}$ . Colorless oil;

**$^1\text{H-NMR}$**  ( $\text{CDCl}_3$ , 400 MHz):  $\delta$  (ppm) 6.44 (dd,  $J = 16.4, 6.4$  Hz, 1H), 6.20 (d,  $J = 16.4$  Hz, 1H), 5.90 (d,  $J = 10.0$  Hz, 1H), 5.82 (m, 1H), 5.25 (d,  $J = 17.2$  Hz, 1H), 5.18 (d,  $J = 10.4$  Hz, 1H), 3.81 (d,  $J = 6.4$  Hz, 2H), 3.64 (t,  $J = 6.0$  Hz, 2H), 3.23 (t,  $J = 7.8$  Hz, 2H), 1.80 (m, 2H), 0.89 (s, 9H), 0.05 (s, 6H);

**$^{13}\text{C-NMR}$**  ( $\text{CDCl}_3$ , 100 MHz):  $\delta$  (ppm) 135.4, 133.1, 126.2, 119.0, 60.1, 50.4, 44.1, 31.8, 25.9(3), 18.2, -5.4(2);

**HRMS**  $m/z$  Calculated for  $\text{C}_{14}\text{H}_{29}\text{NO}_3\text{SiSNa}$  342.1535 ( $\text{M}+\text{Na}$ ) $^+$ , found 342.1525.

**Intramolecular Oxa-Michael reaction procedure:**

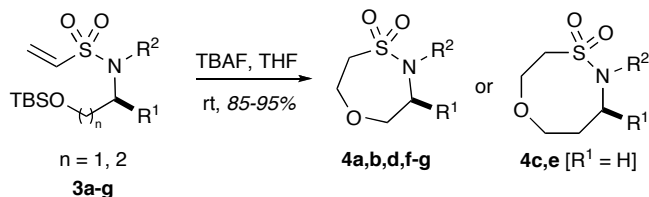

To a stirring solution of benzylated sulfonamide **3** (1.0 equiv.) in THF was added several drops of TBAF (1.0 equiv., 1.0 M in THF) and stirring was continued for 2 hrs at rt.  $\text{NH}_4\text{Cl}$  (sat'd) was added and the organic layer was extracted with  $\text{CH}_2\text{Cl}_2$  (2x), dried ( $\text{MgSO}_4$ ) and the mixture was concentrated under reduced pressure. The crude product was purified by flash column chromatography (Hex: EtOAc, 2:1) to afford both 7- (**4a**, **4b**, **4d**, **4f**, and **4g**) and 8-membered (**4c** and **4e**) ring sultams in excellent yields (85~95%).

**(S)-N-2-Allyl-3-*iso*-propyl-5,1,2-oxathiazepine-1,1-dioxide (4a)**

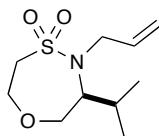

To a stirring solution of allylated sulfonamide **3a** (40 mg, 0.12 mmol) in THF (3 ml) was added TBAF (1.0 M in THF) and stirring was continued for 2 hrs at rt. NH<sub>4</sub>Cl (2 ml, sat'd) was added and the organic layer was extracted with CH<sub>2</sub>Cl<sub>2</sub> (2x4 ml), dried (MgSO<sub>4</sub>) and the mixture was concentrated under reduced pressure. The crude product was purified by flash column chromatography (Hexane/EtOAc = 2:1) to afford 25 mg of **4a** (92%) in excellent yield.

[ $\alpha$ ]<sup>23</sup> -15.8 (c 1.95, CH<sub>2</sub>Cl<sub>2</sub>) Colorless oil;

**FTIR** (neat) : 3468, 2966, 1740, 1298, 1203, 1145 cm<sup>-1</sup>;

**<sup>1</sup>H-NMR** (CDCl<sub>3</sub>, 400 MHz):  $\delta$  (ppm) 5.95 (dddd,  $J$  = 16.2, 10.2, 6.7, 6.7 Hz, 1H), 5.20 (d,  $J$  = 16.2 Hz, 1H), 5.14 (d,  $J$  = 10.2 Hz, 1H), 4.11 (dd,  $J$  = 12.7, 6.4 Hz, 1H), 3.95 (m, 2H), 3.74 (m, 3H), 3.25 (overlap, 3H), 1.74 (m, 1H), 0.99 (d,  $J$  = 6.6 Hz, 3H), 0.79 (d,  $J$  = 6.7 Hz, 3H);

**<sup>13</sup>C-NMR** (CDCl<sub>3</sub>, 100 MHz):  $\delta$  (ppm) 134.5, 118.3, 74.3, 65.5, 63.3, 54.2, 52.3, 30.8, 21.0, 19.4;

**HRMS** m/z Calculated for C<sub>10</sub>H<sub>19</sub>NO<sub>3</sub>SNa 256.0983 (M+Na)<sup>+</sup>, found 256.0970.

**(S)-N-(2-Bromobenzyl)-3-(benzyl)-5,1,2-Oxathiazepine-1,1-dioxide (4b)**

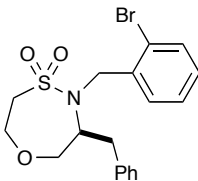

[ $\alpha$ ]<sup>23</sup> - 48.3 (c 2.47, CH<sub>2</sub>Cl<sub>2</sub>) Colorless oil;

**FTIR** (neat): 2945, 1336, 1144, 1026, 752 cm<sup>-1</sup>;

**<sup>1</sup>H-NMR** (CDCl<sub>3</sub>, 400 MHz):  $\delta$  (ppm) 7.62-6.94 (aromatic H, 9H), 4.58 (d,  $J$  = 3.6 Hz, 2H), 4.13 (ddd,  $J$  = 13.4, 4.4, 4.3 Hz, 1H), 4.52 (m, 4H), 3.41 (m, 2H), 2.78 (dd,  $J$  = 13.5, 5.2 Hz, 1H), 2.63 (dd,  $J$  = 13.5, 7.8 Hz, 1H);

**<sup>13</sup>C-NMR** (CDCl<sub>3</sub>, 100 MHz):  $\delta$  (ppm) 137.2, 136.0, 132.7, 131.1, 129.3, 128.8, 128.6, 127.8, 126.6, 123.1, 75.2, 66.1, 59.5, 54.7, 52.8, 38.8;

**HRMS** m/z Calculated for C<sub>18</sub>H<sub>20</sub>NO<sub>3</sub>SBrNa 432.0245 (M+Na)<sup>+</sup>, found 432.0259.

***N*-(2-Allyl)-6,1,2-Oxathiazepine-1,1-dioxide (4c)**

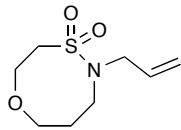

**FTIR** (neat): 2927, 1331, 1136, 746  $\text{cm}^{-1}$ . Colorless oil;

**$^1\text{H-NMR}$**  ( $\text{CDCl}_3$ , 400 MHz):  $\delta$  (ppm) 5.77 (m, 1H), 5.25 (d,  $J = 17.1$  Hz, 1H), 5.20 (d,  $J = 10.1$  Hz, 1H), 4.02 (t,  $J = 5.0$  Hz, 2H), 3.77 (m, 4H), 3.55 (t,  $J = 5.3$  Hz, 1H), 3.08 (d,  $J = 4.9$  Hz, 2H), 1.61 (s, 3H);

**$^{13}\text{C-NMR}$**  ( $\text{CDCl}_3$ , 100 MHz):  $\delta$  (ppm) 133.2, 118.8, 73.4, 69.5, 51.6, 48.2, 45.1, 26.2, 14.1;

**HRMS**  $m/z$  Calculated for  $\text{C}_8\text{H}_{15}\text{NO}_3\text{SNa}$  228.0670 ( $\text{M}+\text{Na}$ ) $^+$ , found 228.0670.

**(*S*)-*N*-2-(*o*-Methylbenzyl)-3-benzyl-5,1,2-oxathiazepine-1,1-dioxide (4d)**

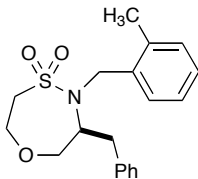

$[\alpha]^{23}_{\text{D}}$   $-30.1$  (c 1.70,  $\text{CH}_2\text{Cl}_2$ ) Colorless oil;

**FTIR** (neat): 2949, 2874, 1495, 1337, 1150, 1030, 702  $\text{cm}^{-1}$ ;

**$^1\text{H-NMR}$**  ( $\text{CDCl}_3$ , 400 MHz):  $\delta$  (ppm) 7.40-6.69 (aromatic H, 9H), 4.75 (d,  $J = 13.6$  Hz, 1H), 4.16 (ddd,  $J = 12.0, 5.2, 2.8$  Hz, 1H), 4.14 (d,  $J = 13.6$  Hz, 1H), 4.06 (dd,  $J = 13.2, 6.8$  Hz, 1H), 3.96 (dd,  $J = 13.2, 10.8$  Hz, 1H), 3.86 (ddd,  $J = 11.6, 11.2, 2.8$  Hz, 1H), 3.55 (m, 1H), 3.48 (ddd,  $J = 16.0, 11.2, 4.8$  Hz, 1H), 3.31 (ddd,  $J = 14.4, 2.4, 2.4$  Hz, 1H), 2.60 (dd,  $J = 8.4, 4.0$  Hz, 2H), 2.42 (s, 3H);

**$^{13}\text{C-NMR}$**  ( $\text{CDCl}_3$ , 100 MHz):  $\delta$  (ppm) 137.9, 137.7, 133.6, 131.0, 130.6, 128.7, 128.5, 128.4, 126.4, 126.0, 76.2, 67.2, 59.0, 53.7, 39.5, 19.4;

**HRMS**  $m/z$  Calculated for  $\text{C}_{19}\text{H}_{23}\text{NO}_3\text{SNa}$  368.1296 ( $\text{M}+\text{Na}$ ) $^+$ , found 368.1282.

***N*-(2-(4-Fluorobenzyl))-6,1,2-Oxathiazepine-1,1-dioxide (4e)**

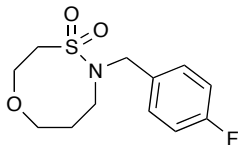

**FTIR** (neat): 2925, 133, 1126, 730  $\text{cm}^{-1}$ . Colorless oil;

**$^1\text{H-NMR}$**  ( $\text{CDCl}_3$ , 400 MHz):  $\delta$  (ppm) 7.40 (m, 2H), 7.05 (m, 2H), 4.38 (s, 2H), 4.16 (t,  $J = 5.5$  Hz, 2H), 3.87 (t,  $J = 5.0$  Hz, 2H), 3.46 (t,  $J = 5.0$  Hz, 2H), 3.22 (t,  $J = 4.8$  Hz, 2H), 1.61 (m, 2H);

**$^{13}\text{C-NMR}$**  ( $\text{CDCl}_3$ , 100 MHz):  $\delta$  (ppm) 162.5 (d,  $J_{\text{CF}} = 244$  Hz), 131.2, 130.1, 130.0, 115.7, 115.5, 73.9, 69.8, 51.9, 47.9, 44.3, 25.6;

**HRMS**  $m/z$  Calculated for  $\text{C}_{12}\text{H}_{16}\text{FNO}_3\text{SNa}$  296.0733 ( $\text{M}+\text{Na}$ ) $^+$ , found 296.0721.

**(*S*)-*N*-2-(*m*-Chlorobenzyl)-3-*iso*-butyl-5,1,2-oxathiazepine-1,1-dioxide (4f)**

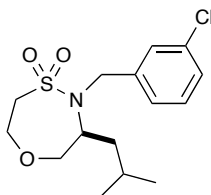

$[\alpha]^{23}_{\text{D}}$   $-17.4$  (c 1.52,  $\text{CH}_2\text{Cl}_2$ ) Colorless oil;

**FTIR** (neat): 2955, 1470, 1337, 1150, 1118, 752  $\text{cm}^{-1}$ ;

**$^1\text{H-NMR}$**  ( $\text{CDCl}_3$ , 400 MHz):  $\delta$  (ppm) 7.45-7.28 (aromatic H, 4H), 4.43 (d,  $J = 15.6$  Hz, 1H), 4.26 (d,  $J = 15.6$  Hz, 1H), 3.96 (overlap, 5H), 3.38 (m, 2H), 1.35 (m, 1H), 1.34 (ddd,  $J = 14.0$ , 7.7, 5.5 Hz, 1H), 0.96 (ddd,  $J = 14.1$ , 8.3, 4.9 Hz, 1H), 0.73 (d,  $J = 6.8$  Hz, 3H), 0.52 (d,  $J = 6.8$  Hz, 3H);

**$^{13}\text{C-NMR}$**  ( $\text{CDCl}_3$ , 100 MHz):  $\delta$  (ppm) 139.8, 134.3, 129.8, 128.5, 127.9, 126.6, 74.2, 64.6, 55.6, 54.5, 50.9, 39.7, 24.3, 22.3, 21.9;

**HRMS** (ESI)  $m/z$  Calculated for  $\text{C}_{15}\text{H}_{22}\text{NO}_3\text{SClNa}$  354.0907 ( $\text{M}+\text{Na}$ ) $^+$ , found 354.0933.

**(S)-N-2-Benzyl-3-*iso*-butyl-5,1,2-oxathiazepine-1,1-dioxide (4g)**

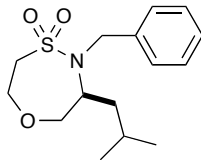

$[\alpha]^{23}$   $-26.3$  (c 2.31,  $\text{CH}_2\text{Cl}_2$ ) Colorless oil;

**FTIR** (neat): 2955, 1334, 1142, 1119, 732  $\text{cm}^{-1}$ ;

**$^1\text{H-NMR}$**  ( $\text{CDCl}_3$ , 400 MHz):  $\delta$  (ppm) 7.46-7.29 (aromatic H, 5H), 4.44 (d,  $J = 5.2$  Hz, 1H), 4.34 (d,  $J = 5.2$  Hz, 1H), 4.02 (m, 2H), 3.93 (overlap, 3H), 3.37 (ddd,  $J = 5.9, 3.6, 3.6$  Hz, 2H), 1.27 (m, 2H), 0.98 (m, 1H), 0.70 (d,  $J = 6.4$  Hz, 3H), 0.48 (d,  $J = 6.4$  Hz, 3H);

**$^{13}\text{C-NMR}$**  ( $\text{CDCl}_3$ , 100 MHz):  $\delta$  (ppm) 137.4, 128.7(2), 128.5(2), 127.7, 74.6, 64.9, 55.6, 54.5, 52.0, 40.0, 24.3, 22.2, 22.0;

**HRMS** (ESI)  $m/z$  Calculated for  $\text{C}_{15}\text{H}_{23}\text{NO}_3\text{SNa}$  320.1296 ( $\text{M}+\text{Na}$ ) $^+$ , found 320.1295.

**(S)-N-(2-Bromobenzyl)-N-(1-(*tert*-butyldimethylsilyloxy)-4-methylpentan-2-yl)ethenesulfonamide (3h).**

In a procedure similar to the preparation of **3a**, flash chromatography ( $\text{SiO}_2$ , Hexane/EtOAc = 2:1) afforded **3i** in a yield of 71% over 3 steps as a clear liquid.

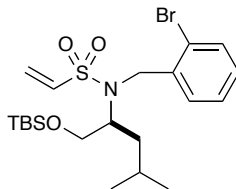

$[\alpha]^{23}$   $-22.4$  (c 2.25,  $\text{CH}_2\text{Cl}_2$ ) Colorless oil;

**FTIR** (neat): 2955, 1470, 1342, 1111, 838  $\text{cm}^{-1}$ ;

**$^1\text{H-NMR}$**  ( $\text{CDCl}_3$ , 400 MHz):  $\delta$  (ppm) 7.86-7.12 (aromatic H, 4H), 6.65 (dd,  $J = 16.8, 9.2$  Hz, 1H), 6.25 (d,  $J = 16.8$  Hz, 1H), 5.89 (d,  $J = 16.8, 9.6$  Hz, 1H), 4.43 (s, 2H), 3.93 (m, 1H), 3.73 (dd,  $J = 11.2, 8.4$  Hz, 1H), 3.57 (dd,  $J = 10.8, 4.8$  Hz, 1H), 1.64 (m, 1H), 1.14 (m, 2H), 0.92 (s, 9H), 0.87 (d,  $J = 6.4$  Hz, 3H), 0.69 (d,  $J = 6.8$  Hz, 3H), 0.08 (s, 3H), 0.07 (s, 3H);

**$^{13}\text{C-NMR}$**  ( $\text{CDCl}_3$ , 100 MHz):  $\delta$  (ppm) 137.4, 135.9, 132.3, 130.4, 128.8, 127.6, 125.8, 122.3, 63.7, 58.7, 47.4, 39.3, 26.0(3), 24.5, 22.6, 22.2, 18.4, -5.4(2);

**HRMS**  $m/z$  Calculated for  $\text{C}_{21}\text{H}_{36}\text{NO}_3\text{SSiNa}$  514.1266 ( $\text{M}+\text{Na}$ ) $^+$ , found 514.1266.



**(S)-N-Allyl-N-(1-(tert-butyldimethylsilyloxy)-4-methylpentan-2-yl)ethenesulfonamide (3i)**

In a procedure similar to the preparation of **3a**, flash chromatography (SiO<sub>2</sub>, Hexane/EtOAc = 2:1) afforded **3i** in a yield of 72% over 3 steps as a clear liquid.

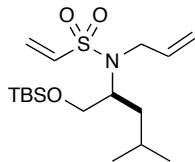

$[\alpha]^{23}_{\text{D}}$  -35.4 (c 4.12, CH<sub>2</sub>Cl<sub>2</sub>) Colorless oil;

FTIR (neat): 2955, 1471, 1340, 1105, 837 cm<sup>-1</sup>;

<sup>1</sup>H-NMR (CDCl<sub>3</sub>, 400 MHz):  $\delta$  (ppm) 6.47 (dd,  $J = 16.4, 10.0$  Hz, 1H), 6.07 (d,  $J = 16.4$  Hz, 1H), 5.80 (dddd,  $J = 16.4, 10.4, 6.4, 6.4$  Hz, 1H), 5.73 (d,  $J = 10.0$  Hz, 1H), 5.13 (d,  $J = 17.2$  Hz, 1H), 5.03 (d,  $J = 10.0$  Hz, 1H), 3.82 (m, 1H), 3.69 (d,  $J = 6.4$  Hz, 2H), 3.59 (dd,  $J = 10.8, 7.2$  Hz, 1H), 3.52 (dd,  $J = 10.8, 4.8$  Hz, 1H), 1.62 (m, 1H), 1.41 (ddd,  $J = 13.6, 9.6, 5.2$  Hz, 1H), 1.19 (ddd,  $J = 13.6, 8.4, 5.2$  Hz, 1H), 0.86 (d,  $J = 7.2$  Hz, 6H), 0.85 (s, 9H), 0.01 (s, 6H);

<sup>13</sup>C-NMR (CDCl<sub>3</sub>, 100 MHz):  $\delta$  (ppm) 136.8, 136.1, 124.6, 117.0, 64.4, 58.0, 46.4, 38.9, 25.9 (3), 24.2, 22.9, 22.0, 18.2, -5.5(2);

HRMS  $m/z$  Calculated for C<sub>17</sub>H<sub>35</sub>NO<sub>3</sub>SSiNa 384.2005 (M+Na)<sup>+</sup>, found 384.1988.

**(S)-N-(1-(tert-Butyldimethylsilyloxy)-3-phenylpropan-2-yl)-N-(prop-2-ynyl)ethanesulfonamide (3j)**

In a procedure similar to the preparation of **3a**, flash chromatography (SiO<sub>2</sub>, Hexane/EtOAc = 2:1) afforded **3j** in a yield of 68% over 3 steps as a clear liquid.

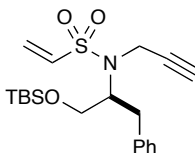

$[\alpha]^{23}_{\text{D}}$  -17.3 (c 5.50, CH<sub>2</sub>Cl<sub>2</sub>) Colorless oil;

FTIR (neat): 3282, 2953, 1456, 1340, 1149, 837, 777 cm<sup>-1</sup>;

<sup>1</sup>H-NMR (CDCl<sub>3</sub>, 400 MHz):  $\delta$  (ppm) 7.34-7.25 (aromatic H, 5H), 6.33 (dd,  $J = 16.4, 9.6$  Hz, 1H), 6.18 (d,  $J = 16.8$  Hz, 1H), 5.78 (d,  $J = 9.6$  Hz, 1H), 4.20 (d,  $J = 2.4$  Hz, 2H), 4.00 (m, 1H),

3.76 (dd,  $J = 5.6, 2.4$  Hz, 2H), 3.12 (dd,  $J = 13.6, 8.4$  Hz, 1H), 3.0 (dd,  $J = 13.6, 6.4$  Hz, 1H), 2.33 (t,  $J = 2.4$  Hz, 1H), 0.92 (s, 9H), 0.06 (s, 6H);

$^{13}\text{C-NMR}$  ( $\text{CDCl}_3$ , 100 MHz):  $\delta$  (ppm) 138.1, 136.3, 129.4(2), 128.5(2), 126.7, 125.5, 80.4, 72.6, 63.8, 61.3, 36.0, 33.8, 25.9(3), 18.2, -5.5(2);

**HRMS**  $m/z$  Calculated for  $\text{C}_{20}\text{H}_{31}\text{NO}_3\text{SSiNa}$  416.1692 ( $\text{M}+\text{Na}$ ) $^+$ , found 416.1700.

**(S)-N-(Benzyl)-N-(1-(*tert*-butyldimethylsilyloxy)-3-phenylpropan-2-yl)ethanesulfonamide (3k)**

In a procedure similar to the preparation of **3a**, flash chromatography ( $\text{SiO}_2$ , Hexane/EtOAc = 2:1) afforded **3k** in a yield of 73% over 3 steps as a clear liquid.

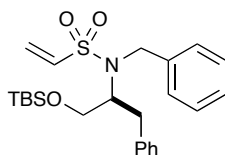

$[\alpha]^{23} -27.6$  (c 3.44,  $\text{CH}_2\text{Cl}_2$ ) Colorless oil;

**FTIR** (neat): 2950, 1451, 1341, 1144, 843, 756  $\text{cm}^{-1}$ ;

$^1\text{H-NMR}$  ( $\text{CDCl}_3$ , 400 MHz):  $\delta$  (ppm) 7.50-7.13 (aromatic H, 10H), 6.16 (d,  $J = 3.6$  Hz, 1H), 6.15 (d,  $J = 6.8$  Hz, 1H), 5.70 (dd,  $J = 6.8, 3.2$  Hz, 1H), 4.17 (s, 2H), 4.08 (m, 1H), 3.75 (dd,  $J = 10.8, 7.6$  Hz, 1H), 3.50 (dd,  $J = 10.8, 5.6$  Hz, 1H), 2.89 (dd,  $J = 13.6, 6.8$  Hz, 1H), 2.78 (dd,  $J = 14.0, 8.0$  Hz, 1H), 0.90 (s, 9H), 0.04 (s, 3H), 0.02 (s, 3H);

$^{13}\text{C-NMR}$  ( $\text{CDCl}_3$ , 100 MHz):  $\delta$  (ppm) 138.6(2), 138.0, 136.2, 129.2(2), 128.6(2), 127.7(2), 126.6(2), 125.1(2), 63.3, 62.7, 48.9, 37.5, 26.0(3), 18.2, -5.5(2);

**HRMS**  $m/z$  Calculated for  $\text{C}_{24}\text{H}_{35}\text{NO}_3\text{SiSBrNa}$  468.2005 ( $\text{M}+\text{Na}$ ) $^+$ , found 468.1979.

### General Intramolecular Baylis-Hillman reaction procedure:

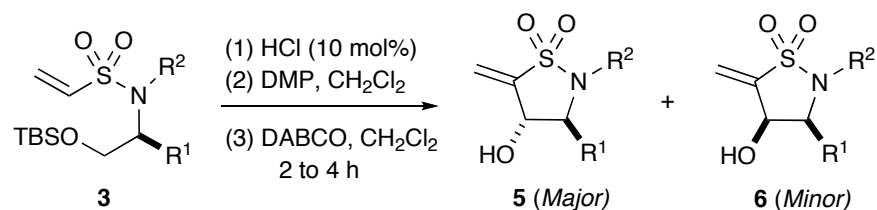

To a stirring solution of sulfonamide **3** (1 equiv.) in THF (small amount) was added 10 mol% HCl. The resulting vinyl sulfonamide alcohol was extracted with CH<sub>2</sub>Cl<sub>2</sub> twice, dried (MgSO<sub>4</sub>), filtered and Dess-Martin periodinane (2.0 equiv.) was added. After 2 hours, the reaction mixture was washed with NaHCO<sub>3</sub> to remove the resultant solid acid. After filtration, the organic layer was separated, dried (MgSO<sub>4</sub>) and partially concentrated under reduced pressure. DABCO (0.10 equiv.) was added to the crude mixture of aldehyde vinyl sulfonamide. Stirring was continued until TLC analysis indicated that the starting material was consumed (normally 2 to 4 hrs). The solvent was removed under reduced pressure and the crude product was purified by flash column chromatography to yield an inseparable mixture of 5-membered ring sultam diastereoisomers **5a-f** and **6a-f**. The same procedure was applied to bicyclic sultam and 6-membered ring sultam synthesis.

\* Characterized as an inseparable mixture of major and minor diastereomers.

**Major: N-2-Allyl-3(S)-iso-propyl-4(S)-hydroxy-5-methylene-isothiazolidine-1,1-dioxide (5a).**

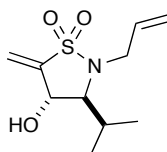

To a stirring solution of sulfonamide **3a** (87 mg, 0.25 mmol) in THF (0.5 ml) was added 10 mol % HCl (5 ml). The resulting vinyl sulfonamide alcohol was extracted with CH<sub>2</sub>Cl<sub>2</sub> (2x5 ml), dried (MgSO<sub>4</sub>), filtered and Dess-Martin periodinane (212 mg, 2.0 equiv.) was added. After 2 hours, the reaction mixture was washed with saturated NaHCO<sub>3</sub> (10 ml) to remove the resultant solid acid. After filtration, the organic layer was separated, dried (MgSO<sub>4</sub>) and partially concentrated under reduced pressure. DABCO (3.8 mg, 0.10 equiv.) was added to the crude mixture of aldehyde vinyl sulfonamide. Stirring was continued until TLC analysis indicated that the starting material was consumed (normally 2 to 4 hrs). The solvent was removed under reduced pressure and the crude product was purified by flash column chromatography

(Hexane/EtOAc = 2:1) to yield an inseparable mixture of 5-membered ring sultam diastereoisomers (40.0 mg, 69%) **5a** (Major) and **6a** (Minor).

**FTIR** (neat): 3472, 2964, 1468, 1290, 1136, 933, 784  $\text{cm}^{-1}$ . Colorless oil;

**$^1\text{H-NMR}$**  ( $\text{CDCl}_3$ , 400 MHz):  $\delta$  (ppm) 6.10 (s, 1H), 5.91 (s, 1H), 5.83 (m, 1H), 5.25 (overlap, 2H), 4.62 (dd,  $J = 3.6, 1.6$  Hz, 1H), 3.89 (dd,  $J = 15.6, 5.2$  Hz, 1H), 3.66 (dd,  $J = 16.4, 8.4$  Hz, 1H), 3.56 (broad, 1H), 3.13 (dd,  $J = 4.4, 4.4$  Hz, 1H), 2.01 (m, 1H), 1.03 (d,  $J = 7.2$  Hz, 3H), 0.90 (d,  $J = 6.8$  Hz, 3H);

**$^{13}\text{C-NMR}$**  ( $\text{CDCl}_3$ , 100 MHz):  $\delta$  (ppm) 147.8, 132.5, 119.8, 118.1, 68.8, 66.7, 46.8, 28.5, 18.6, 16.4;

**HRMS**  $m/z$  Calculated for  $\text{C}_{10}\text{H}_{17}\text{NO}_3\text{S}$  232.1007 ( $\text{M}+\text{H}^+$ ), found 232.0997.

**Minor: *N*-2-Allyl-3(S)-*iso*-propyl-4(R)-hydroxy-5-methylene-isothiazolidine-1,1-dioxide (6a).**

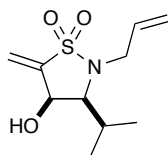

**FTIR** (neat): 3473, 2963, 1468, 1290, 1136, 932, 787  $\text{cm}^{-1}$ . Colorless oil;

**$^1\text{H-NMR}$**  ( $\text{CDCl}_3$ , 400 MHz):  $\delta$  (ppm) 6.08 (s, 1H), 5.86 (s, 1H), 5.83 (m, 1H), 5.25 (overlap, 2H), 4.92 (d,  $J = 6.8$  Hz, 1H), 3.90 (dd,  $J = 15.6, 4.4$  Hz, 1H), 3.66 (dd,  $J = 16.4, 8.4$  Hz, 1H), 3.56 (broad, 1H), 3.37 (dd,  $J = 6.4, 6.0$  Hz, 1H), 2.11 (m, 1H), 1.02 (d,  $J = 6.8$  Hz, 3H), 0.99 (d,  $J = 6.8$  Hz, 3H);

**$^{13}\text{C-NMR}$**  ( $\text{CDCl}_3$ , 100 MHz):  $\delta$  (ppm) 148.1, 132.4, 120.1, 117.1, 68.4, 65.9, 48.1, 28.8, 20.0, 16.4;

**HRMS**  $m/z$  Calculated for  $\text{C}_{10}\text{H}_{17}\text{NO}_3\text{S}$  232.1007 ( $\text{M}+\text{H}^+$ ), found 232.0997.

\* Characterized as an inseparable mixture of major and minor diastereomers.

**Major: *N*-(2-Bromobenzyl)-3(S)-*iso*-propyl-4(S)-hydroxy-5-methylene-isothiazolidine-1,1-dioxide (5b)**

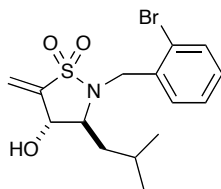

**FTIR** (neat): 3472, 2957, 1294, 1142, 752  $\text{cm}^{-1}$ . Colorless oil;

**$^1\text{H-NMR}$**  ( $\text{CDCl}_3$ , 400 MHz):  $\delta$  (ppm) 7.56-7.13 (aromatic H, 4H), 6.21 (s, 1H), 5.99 (s, 1H), 4.85 (d,  $J = 5.5$  Hz, 1H), 4.55 (dd,  $J = 16.2, 10.5$  Hz, 1H), 4.33 (dd,  $J = 16.8, 16.0$  Hz, 1H), 3.60 (broad, 1H), 3.52 (ddd,  $J = 8.0, 5.6, 5.2$  Hz, 1H), 1.63 (m, 2H), 1.28 (m, 1H), 0.80 (d,  $J = 6.8$  Hz, 3H), 0.79 (d,  $J = 7.0$  Hz, 3H);

**$^{13}\text{C-NMR}$**  ( $\text{CDCl}_3$ , 100 MHz):  $\delta$  (ppm) 147.8, 135.4, 133.0, 130.3, 129.4, 127.8, 123.1, 119.5, 68.1, 60.5, 46.5, 35.7, 24.6, 23.1, 22.2;

**HRMS**  $m/z$  Calculated for  $\text{C}_{15}\text{H}_{20}\text{NO}_3\text{SBrNa}$  396.0245 ( $\text{M}+\text{Na}$ ) $^+$ , found 396.0247.

**Minor: *N*-(2-Bromobenzyl)-3(S)-*iso*-propyl-4(R)-hydroxy-5-methylene-isothiazolidine-1,1-dioxide (6b)**

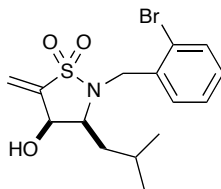

**FTIR** (neat): 3472, 2957, 1294, 1142, 752  $\text{cm}^{-1}$ . Colorless oil;

**$^1\text{H-NMR}$**  ( $\text{CDCl}_3$ , 400 MHz):  $\delta$  (ppm) 7.56-7.13 (aromatic H, 4H), 6.21 (s, 1H), 5.99 (s, 1H), 4.85 (d,  $J = 5.5$  Hz, 1H), 4.55 (dd,  $J = 16.2, 10.7$  Hz, 1H), 4.33 (dd,  $J = 16.8, 16.0$  Hz, 1H), 3.60 (broad, 1H), 3.32 (ddd,  $J = 9.0, 4.2, 3.8$  Hz, 1H), 1.63 (m, 2H), 1.41 (m, 1H), 0.80 (d,  $J = 6.8$  Hz, 3H), 0.79 (d,  $J = 7.0$  Hz, 3H);

**$^{13}\text{C-NMR}$**  ( $\text{CDCl}_3$ , 100 MHz):  $\delta$  (ppm) 147.7, 135.0, 132.9, 130.4, 129.5, 127.8, 123.2, 119.5, 71.5, 63.7, 46.9, 40.6, 24.7, 23.3, 21.9;

**HRMS**  $m/z$  Calculated for  $\text{C}_{15}\text{H}_{20}\text{NO}_3\text{SBrNa}$  396.0245 ( $\text{M}+\text{Na}$ ) $^+$ , found 396.0247.

\* Characterized as an inseparable mixture of major and minor diastereomers.

**Major: *N*-(2-Allyl)-3(*S*)-*iso*-propyl-4(*S*)-hydroxy-5-methylene-isothiazolidine-1,1-dioxide (5c)**

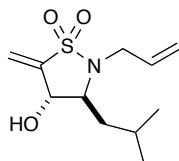

**FTIR** (neat): 3472, 2957, 1467, 1297, 1124, 732  $\text{cm}^{-1}$ . Colorless oil;

**$^1\text{H-NMR}$**  ( $\text{CDCl}_3$ , 400 MHz):  $\delta$  (ppm) 6.15 (s, 1H), 5.94 (s, 1H), 5.87 (m, 1H), 5.32 (dd,  $J = 17.2, 1.6$  Hz, 1H), 5.24 (dd,  $J = 10.6, 1.6$  Hz, 1H), 4.76 (d,  $J = 4.8$  Hz, 1H), 3.85 (dddd,  $J = 16.0, 4.8, 1.6, 1.6$  Hz, 1H), 3.60 (dd,  $J = 16.0, 8.0$  Hz, 1H), 3.51 (ddd,  $J = 8.4, 5.6, 5.6$  Hz, 1H), 3.46 (broad, 1H), 1.79 (m, 1H), 1.58 (ddd,  $J = 14.0, 8.4, 5.6$  Hz, 1H), 1.38 (ddd,  $J = 14.0, 8.4, 6.0$  Hz, 1H), 0.91 (d,  $J = 6.8$  Hz, 3H), 0.88 (d,  $J = 6.4$  Hz, 3H);

**$^{13}\text{C-NMR}$**  ( $\text{CDCl}_3$ , 100 MHz):  $\delta$  (ppm) 148.0, 132.6, 119.7, 119.2, 67.8, 58.7, 45.4, 35.6, 24.6, 23.2, 22.1;

**HRMS**  $m/z$  Calculated for  $\text{C}_{11}\text{H}_{19}\text{NO}_3\text{SNa}$  268.0983 ( $\text{M}+\text{Na}$ ) $^+$ , found 268.0959.

**Minor: *N*-(2-Allyl)-3(*S*)-*iso*-propyl-4(*R*)-hydroxy-5-methylene-isothiazolidine-1,1-dioxide (6c)**

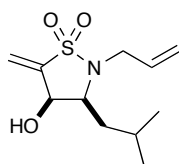

**FTIR** (neat): 3472, 2957, 1467, 1297, 1124, 732  $\text{cm}^{-1}$ . Colorless oil;

**$^1\text{H-NMR}$**  ( $\text{CDCl}_3$ , 400 MHz):  $\delta$  (ppm) 6.12 (s, 1H), 5.93 (s, 1H), 5.87 (m, 1H), 5.32 (dd,  $J = 17.2, 1.6$  Hz, 1H), 5.24 (dd,  $J = 10.6, 1.6$  Hz, 1H), 4.48 (broad, 1H), 3.85 (dddd,  $J = 16.0, 4.8, 1.6, 1.6$  Hz, 1H), 3.68 (dd,  $J = 15.6, 7.6$  Hz, 1H), 3.46 (broad, 1H), 3.31 (ddd,  $J = 9.2, 4.4, 4.4$  Hz, 1H), 1.79 (m, 1H), 1.53 (ddd,  $J = 13.6, 8.8, 4.8$  Hz, 1H), 1.38 (m, 1H), 0.92 (d,  $J = 6.8$  Hz, 3H), 0.89 (d,  $J = 6.8$  Hz, 3H);

**$^{13}\text{C-NMR}$**  ( $\text{CDCl}_3$ , 100 MHz):  $\delta$  (ppm) 147.9, 132.5, 119.6, 118.7, 71.3, 62.1, 45.6, 40.6, 24.6, 23.5, 22.3;

**HRMS**  $m/z$  Calculated for  $\text{C}_{11}\text{H}_{19}\text{NO}_3\text{SNa}$  268.0983 ( $\text{M}+\text{Na}$ ) $^+$ , found 268.0959.

\* Characterized as an inseparable mixture of major and minor diastereomers.

**Major: *N*-(2-Propargyl)-3(*S*)-Benzyl-4(*S*)-hydroxy-5-methylene-isothiazolidine-1,1-dioxide (5d)**

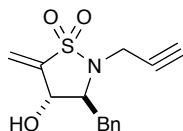

**FTIR** (neat): 3477, 3281, 2926, 1433, 1298, 1138, 704  $\text{cm}^{-1}$ . Colorless oil;

**$^1\text{H-NMR}$**  ( $\text{CDCl}_3$ , 400 MHz):  $\delta$  (ppm) 7.36-7.28 (aromatic H, 5H), 6.24 (s, 1H), 5.97 (s, 1H), 4.68 (m, 1H), 4.15 (dd,  $J = 18.4, 2.0$  Hz, 1H), 3.89 (ddd,  $J = 8.0, 6.4, 5.2$  Hz, 1H), 3.58 (dd,  $J = 18.4, 2.4$  Hz, 1H), 3.04 (dd,  $J = 13.2, 8.4$  Hz, 1H), 3.07 (dd,  $J = 13.2, 6.8$  Hz, 1H), 2.83 (d,  $J = 6.8$  Hz, 1H), 2.38 (dd,  $J = 2.4, 2.0$  Hz, 1H);

**$^{13}\text{C-NMR}$**  ( $\text{CDCl}_3$ , 100 MHz):  $\delta$  (ppm) 147.3, 136.2, 129.6, 128.8, 127.0, 120.1, 76.5, 74.1, 67.4, 62.0, 33.6, 32.7;

**HRMS**  $m/z$  Calculated for  $\text{C}_{14}\text{H}_{15}\text{NO}_3\text{SNa}$  300.0670 ( $\text{M}+\text{Na}$ ) $^+$ , found 300.0672.

**Minor: *N*-(2-Propargyl)-3(*S*)-Benzyl-4(*R*)-hydroxy-5-methylene-isothiazolidine-1,1-dioxide (6d)**

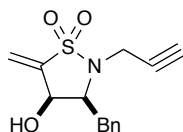

**FTIR** (neat): 3477, 3281, 2926, 1433, 1298, 1138, 704  $\text{cm}^{-1}$ . Colorless oil;

**$^1\text{H-NMR}$**  ( $\text{CDCl}_3$ , 400 MHz):  $\delta$  (ppm) 7.36-7.28 (aromatic H, 5H), 6.19 (s, 1H), 5.93 (s, 1H), 4.63 (broad, 1H), 4.15 (dd,  $J = 18.4, 2.0$  Hz, 1H), 3.76 (ddd,  $J = 7.2, 6.8, 4.8$  Hz, 1H), 3.68 (dd,  $J = 18.4, 2.4$  Hz, 1H), 3.17 (dd,  $J = 14.0, 7.6$  Hz, 1H), 3.18 (dd,  $J = 14.0, 7.6$  Hz, 1H), 2.51 (d,  $J = 6.8$  Hz, 1H), 2.38 (dd,  $J = 2.4, 2.0$  Hz, 1H);

**$^{13}\text{C-NMR}$**  ( $\text{CDCl}_3$ , 100 MHz):  $\delta$  (ppm) 146.9, 136.0, 129.4, 129.0, 127.3, 118.5, 76.5, 74.4, 70.2, 64.9, 37.8, 33.6;

**HRMS**  $m/z$  Calculated for  $\text{C}_{14}\text{H}_{15}\text{NO}_3\text{SNa}$  300.0670 ( $\text{M}+\text{Na}$ ) $^+$ , found 300.0588.

\* Characterized as an inseparable mixture of major and minor diastereomers.

The *dr* ratio is high (7.4:1), therefore the NMR of the minor product is not shown below.

**Major: *N*-(2-Bromobenzyl)-3(*S*)-Benzyl-4(*S*)-hydroxy-5-methylene-isothiazolidine-1,1-dioxide (5e)**

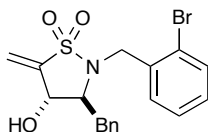

**FTIR** (neat): 3470, 2955, 1440, 1292, 1144, 750  $\text{cm}^{-1}$ . Colorless oil;

**$^1\text{H-NMR}$**  ( $\text{CDCl}_3$ , 400 MHz):  $\delta$  (ppm) 7.56-7.08 (aromatic H, 9H), 6.26 (s, 1H), 5.99 (s, 1H), 4.77 (d,  $J = 4.7$  Hz, 1H), 4.30 (dd,  $J = 16.4$  Hz, 2H), 3.72 (dd,  $J = 12.8, 7.2$  Hz, 1H), 3.50 (d,  $J = 6.0$  Hz, 1H), 3.02 (dd,  $J = 13.6, 7.2$  Hz, 1H), 2.83 (dd,  $J = 13.6, 7.6$  Hz, 1H);

**$^{13}\text{C-NMR}$**  ( $\text{CDCl}_3$ , 100 MHz):  $\delta$  (ppm) 147.5, 136.8, 135.0, 132.9, 130.1, 129.7, 129.4, 128.8, 127.8, 126.9, 123.2, 119.7, 68.1, 63.6, 46.5, 33.8;

**HRMS**  $m/z$  Calculated for  $\text{C}_{18}\text{H}_{18}\text{NO}_3\text{SBrNa}$  430.0088 ( $\text{M}+\text{Na}$ ) $^+$ , found 430.0063.

\* Characterized as an inseparable mixture of major and minor diastereomers.

The *dr* ratio is high (9.0:1), therefore the NMR of the minor product is not shown below.

**Major: *N*-benzyl-3(*S*)-Benzyl-4(*S*)-hydroxy-5-methylene-isothiazolidine-1,1-dioxide (5f)**

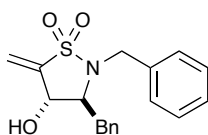

**FTIR** (neat): 3464, 3025, 1495, 1286, 1144, 746  $\text{cm}^{-1}$ . Colorless oil;

**$^1\text{H-NMR}$**  ( $\text{CDCl}_3$ , 400 MHz):  $\delta$  (ppm) 7.56-7.08 (aromatic H, 10H), 6.28 (s, 1H), 5.96 (s, 1H), 4.77 (d,  $J = 4.7$  Hz, 1H), 4.30 (d,  $J = 16.4$  Hz, 1H), 3.55 (overlap, 2H), 2.85 (overlap, 2H), 2.70 (dd,  $J = 12.8, 9.2$  Hz, 1H);

**$^{13}\text{C-NMR}$**  ( $\text{CDCl}_3$ , 100 MHz):  $\delta$  (ppm) 147.4, 137.2, 135.2, 129.6, 128.8, 128.7(2), 128.1, 126.9, 119.0, 68.4, 61.6, 45.8, 33.9;

**HRMS**  $m/z$  Calculated for  $\text{C}_{18}\text{H}_{18}\text{NO}_3\text{SBrNa}$  352.0983 ( $\text{M}+\text{Na}$ ) $^+$ , found 352.0974.



**2-((*tert*-Butyldimethylsilyloxy)methyl)-1-(vinylsulfonyl)pyrrolidine (7)**

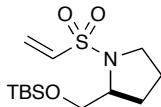

$[\alpha]^{23}_{D}$  -80.4 (c 2.43, CH<sub>2</sub>Cl<sub>2</sub>) Colorless oil;

**FTIR** (neat): 2955, 2856, 1348, 1153, 837, 777 cm<sup>-1</sup>;

**<sup>1</sup>H-NMR** (CDCl<sub>3</sub>, 400 MHz):  $\delta$  (ppm) 6.48 (dd,  $J = 16.4, 9.6$  Hz, 1H), 6.26 (d,  $J = 16.4$  Hz, 1H), 6.00 (d,  $J = 10.0$  Hz, 1H), 3.76 (dd,  $J = 10.0, 3.6$  Hz, 1H), 3.63 (m, 1H), 3.55 (dd,  $J = 10.0, 7.6$  Hz, 1H), 3.36 (m, 1H), 3.20 (m, 1H), 2.00-1.83 (m, 4H), 0.90 (s, 9H), 0.07 (s, 6H);

**<sup>13</sup>C-NMR** (CDCl<sub>3</sub>, 100 MHz):  $\delta$  (ppm) 132.1, 127.7, 65.5, 60.9, 49.2, 28.5, 25.7(3), 24.3, 18.2, -5.4(2);

**HRMS** m/z Calculated for C<sub>13</sub>H<sub>27</sub>NO<sub>3</sub>SiS 306.1559 (M+H)<sup>+</sup>, found 306.1562.

**(*S*)-*N*-(2-Pyrrolidine)-5,1,2-Oxathiazepine-1,1-dioxide (8)**

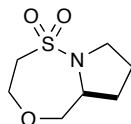

$[\alpha]^{23}_{D}$  -15.4 (c 5.51, CH<sub>2</sub>Cl<sub>2</sub>) Colorless oil;

**FTIR** (neat): 2952, 1334, 1146, 744 cm<sup>-1</sup>;

**<sup>1</sup>H-NMR** (CDCl<sub>3</sub>, 400 MHz):  $\delta$  (ppm) 4.11 (m, 2H), 3.97 (d,  $J = 13.2$  Hz, 1H), 3.74 (ddd,  $J = 13.2, 2.0$  Hz, 1H), 3.57 (m, 2H), 3.37 (m, 1H), 3.23 (m, 1H), 3.12 (m, 1H), 2.00 (m, 4H).

**<sup>13</sup>C-NMR** (CDCl<sub>3</sub>, 100 MHz):  $\delta$  (ppm) 74.4, 67.0, 58.1, 52.1, 50.6, 31.3, 24.2.

**HRMS** m/z Calculated for C<sub>7</sub>H<sub>13</sub>NO<sub>3</sub>SNa 214.0514 (M+Na), found 214.0538 (M+Na)<sup>+</sup>.

***N*-(2-Pyrroldine)-3,4(*S,S*)-hydroxy-5-methylene-isothiazolidine-1,1-dioxide (10).**

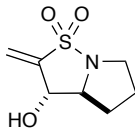

$[\alpha]^{23}$  31.8 (c 5.82, CH<sub>2</sub>Cl<sub>2</sub>) Colorless oil;

FTIR (neat): 3446, 2941, 1299, 1190, 1082 cm<sup>-1</sup>;

<sup>1</sup>H-NMR (CDCl<sub>3</sub>, 400 MHz): δ (ppm) 6.10 (s, 1H), 5.89 (s, 1H), 4.39 (dd, *J* = 6.4, 2.0 Hz, 1H), 3.65 (ddd, *J* = 6.8, 6.6, 3.6 Hz, 1H), 3.60 (ddd, *J* = 11.6, 8.0, 4.8 Hz, 1H), 3.1 (ddd, *J* = 14.0, 7.2, 6.4 Hz, 1H), 2.11 (m, 1H), 1.87 (m, 2H), 1.81 (m, 1H);

<sup>13</sup>C-NMR (CDCl<sub>3</sub>, 100 MHz): δ (ppm) 149.3, 118.3, 72.1, 68.0, 46.7, 29.8, 24.8;

HRMS *m/z* Calculated for C<sub>7</sub>H<sub>11</sub>NO<sub>3</sub>SNa 212.0357 (M+Na)<sup>+</sup>, found 212.0351.

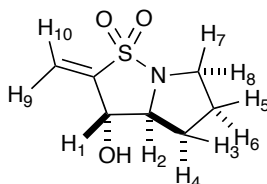

**Table of data:**

Assignment of <sup>1</sup>H and <sup>13</sup>C chemical shifts were based on <sup>1</sup>H, <sup>13</sup>C, DEPT, COSY, NOESY, HSQC and HMBC NMR spectra.

| Protons | <sup>1</sup> H chemical shift (ppm) | <sup>13</sup> C chemical shift (ppm) |
|---------|-------------------------------------|--------------------------------------|
| H1      | 4.89                                | 72.0                                 |
| H2      | 3.68                                | 68.0                                 |
| H3      | 1.91                                | 29.9                                 |
| H4      | 2.15                                | 29.9                                 |
| H5      | 1.81                                | 24.8                                 |
| H6      | 1.94                                | 24.8                                 |
| H7      | 3.67                                | 46.7                                 |
| H8      | 3.12                                | 46.7                                 |
| H9      | 5.90                                | 118.3                                |
| H10     | 6.12                                | 118.3                                |

**(±)-N-2-(tert-butyldimethylsilyoxy)cyclohexyl)-N-(4-chlorobenzyl)ethenesulfonamide**

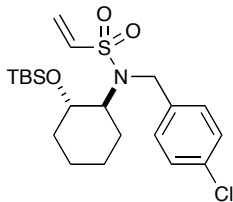

**FTIR** (neat): 2933, 2856, 1450, 1336, 1150, 790  $\text{cm}^{-1}$ . Colorless oil;

**$^1\text{H-NMR}$**  ( $\text{CDCl}_3$ , 400 MHz):  $\delta$  (ppm) 7.35-7.24 (aromatic H, 4H), 6.50 (dd,  $J = 16.4, 10.0$  Hz, 1H), 6.13 (d,  $J = 16.4$  Hz, 1H), 5.75 (d,  $J = 9.6$  Hz, 1H), 4.50 (d,  $J = 16.4$  Hz, 1H), 4.08 (d,  $J = 14.4$  Hz, 1H), 3.73 (broad, 1H), 3.36 (broad, 1H), 2.00 (d,  $J = 12.4$  Hz, 1H), 1.71 (d,  $J = 10.5$  Hz, 1H), 1.60 (d,  $J = 10.9$  Hz, 1H), 1.50 (d,  $J = 10.2$  Hz, 1H), 1.25 (m, 1H), 1.04 (m, 3H), 0.91 (s, 9H), 0.15 (s, 6H);

**$^{13}\text{C-NMR}$**  ( $\text{CDCl}_3$ , 100 MHz):  $\delta$  (ppm) 137.3, 136.7, 133.2, 129.5, 128.5, 124.6, 71.6, 64.7, 64.6, 36.5, 33.2, 26.0(3), 25.5, 24.2, 18.0, -3.56, -3.84;

**HRMS**  $m/z$  Calculated for  $\text{C}_{21}\text{H}_{34}\text{NO}_3\text{SiClNa}$  466.1615 ( $\text{M}+\text{Na}$ ) $^+$ , found 466.1630.

**(±)-Trans-2-(4-chlorobenzyl)-3,4-(cyclohexyl)-5,1,2-Oxathiazepine-1,1-dioxide (13)**

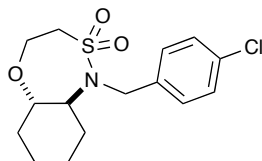

**FTIR** (neat): 2939, 1490, 1328, 1141, 1103  $\text{cm}^{-1}$ . Colorless oil;

**$^1\text{H-NMR}$**  ( $\text{CDCl}_3$ , 400 MHz):  $\delta$  (ppm) 7.34-7.27 (aromatic H, 4H), 4.58 (d,  $J = 10.2$  Hz, 1H), 4.20 (d,  $J = 10.2$  Hz, 1H), 4.11 (ddd,  $J = 14.2, 3.6, 3.3$  Hz, 1H), 3.85 (m, 2H), 3.25 (s, 2H), 2.80 (broad, 1H), 2.01 (d,  $J = 10.8$  Hz, 1H), 1.66 (d,  $J = 12.4$  Hz, 1H), 1.54 (m, 2H), 1.33 (m, 2H), 1.19 (m, 1H), 0.97 (m, 1H);

**$^{13}\text{C-NMR}$**  ( $\text{CDCl}_3$ , 100 MHz):  $\delta$  (ppm) 136.0, 133.5, 129.7, 128.7, 83.7, 65.2, 54.2, 53.6, 34.1, 32.7, 25.1, 24.5;

**HRMS**  $m/z$  Calculated for  $\text{C}_{15}\text{H}_{20}\text{NO}_3\text{SNa}$  352.0750 ( $\text{M}+\text{Na}$ ) $^+$ , found 352.0750.

**(±)-(S)-N-(4-Chlorobenzyl)-N-(2-oxocyclohexyl)ethenesulfonamide (14)**

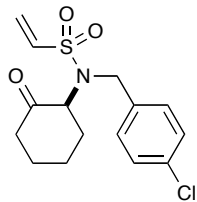

**FTIR** (neat): 2941, 1718, 1334, 1149, 788  $\text{cm}^{-1}$ . Colorless oil;

**$^1\text{H-NMR}$**  ( $\text{CDCl}_3$ , 400 MHz):  $\delta$  (ppm) 7.30 (m, 4H), 6.57 (dd,  $J = 16.4, 10.0$  Hz, 1H), 6.22 (d,  $J = 16.4$  Hz, 1H), 5.95 (d,  $J = 10.0$  Hz, 1H), 4.60 (d,  $J = 17.1$  Hz, 1H), 4.55 (dd,  $J = 13.1, 5.7$  Hz, 1H), 4.04 (d,  $J = 17.2$  Hz, 1H), 2.53 (ddd,  $J = 14.6, 1.8, 1.8$  Hz, 1H), 2.35 (ddd,  $J = 14.1, 6.2, 6.1$  Hz, 1H), 2.00 (m, 2H), 1.88 (ddd,  $J = 15.7, 5.5, 2.1$  Hz, 1H), 1.58 (m, 1H), 1.55 (m, 2H);

**$^{13}\text{C-NMR}$**  ( $\text{CDCl}_3$ , 100 MHz):  $\delta$  (ppm) 207.3, 137.2, 135.2, 133.1, 128.6, 126.7, 66.4, 48.9, 41.8, 34.5, 26.4, 25.0;

**HRMS**  $m/z$  Calculated for  $\text{C}_{15}\text{H}_{18}\text{NO}_3\text{SClK}$  366.0333 ( $\text{M}+\text{K}$ )<sup>+</sup>, found 366.0320.

**(±)-N-(4-Chlorobenzyl)-3,4 (3S,4S) cyclohexyl-hydroxy-5-methylene-isothiazolidine-1,1-dioxide (15)**

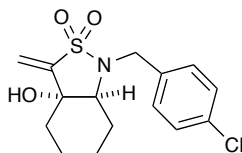

**FTIR** (neat): 3458, 2937, 1490, 1286, 1093, 1014  $\text{cm}^{-1}$ . Colorless oil;

**$^1\text{H-NMR}$**  ( $\text{CDCl}_3$ , 400 MHz):  $\delta$  (ppm) 7.40-7.34 (aromatic H, 4H), 6.27 (d,  $J = 2.0$  Hz, 1H), 5.91 (d,  $J = 2.0$  Hz, 1H), 4.30 (d,  $J = 15.2$  Hz, 1H), 4.24 (d,  $J = 15.6$  Hz, 1H), 3.21 (dd,  $J = 7.2, 4.8$  Hz, 1H), 2.48 (s, 1H), 2.20 (ddd,  $J = 17.6, 8.0, 4.0$  Hz, 1H), 1.88 (m, 1H), 1.73 (ddd,  $J = 12.4, 8.4, 4.0$  Hz, 1H), 1.60 (m, 2H), 1.37 (m, 2H), 1.22 (m, 1H);

**$^{13}\text{C-NMR}$**  ( $\text{CDCl}_3$ , 100 MHz):  $\delta$  (ppm) 150.9, 134.3, 133.8, 129.9, 128.9, 117.4, 72.9, 63.6, 44.9, 33.9, 25.4, 21.4, 20.9;

**HRMS**  $m/z$  Calculated for  $\text{C}_{15}\text{H}_{18}\text{NO}_3\text{SClNa}$  350.0594 ( $\text{M}+\text{Na}$ )<sup>+</sup>, found 350.0587.

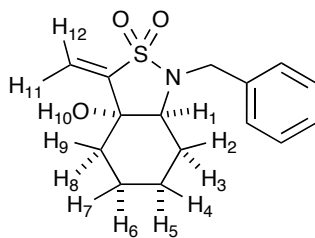

**Table of data:**

Assignments of  $^1\text{H}$  and  $^{13}\text{C}$  chemical shifts were based on  $^1\text{H}$ ,  $^{13}\text{C}$ , DEPT, COSY, NOESY, HSQC and HMBC NMR spectra.

| <b>Protons</b> | $^1\text{H}$ chemical shift (ppm) | $^{13}\text{C}$ chemical shift (ppm) |
|----------------|-----------------------------------|--------------------------------------|
| H1             | 3.21                              | 63.6                                 |
| H2             | 1.62                              | 25.4                                 |
| H3             | 1.87                              | 25.4                                 |
| H4             | 1.36                              | 20.9                                 |
| H5             | 1.21                              | 20.9                                 |
| H6             | 1.62                              | 21.4                                 |
| H7             | 1.37                              | 21.4                                 |
| H8             | 1.72                              | 33.9                                 |
| H9             | 2.20                              | 33.9                                 |
| H10            | 2.48                              | None                                 |
| H11            | 5.90                              | 134.3                                |
| H12            | 6.26                              | 133.8                                |

**(S)-2-(tert-Butyldimethylsilyloxy)-N-isobutyl-3-(trityloxy)propan-1-amine (17)**

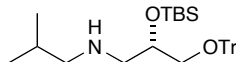

$[\alpha]^{23} -42.3$  (c 2.62, CH<sub>2</sub>Cl<sub>2</sub>) Colorless oil;

**FTIR** (neat): 3058, 2953, 1448, 1253, 1076, 835, 775 cm<sup>-1</sup>;

**<sup>1</sup>H-NMR** (CDCl<sub>3</sub>, 400 MHz):  $\delta$  (ppm) 7.59-7.28 (aromatic H, 15H), 4.12 (m, 1H), 3.25 (dd,  $J = 9.2, 4.8$  Hz, 1H), 3.22 (dd,  $J = 9.2, 6.4$  Hz, 1H), 3.01 (dd,  $J = 11.6, 4.0$  Hz, 1H), 2.80 (dd,  $J = 11.6, 7.2$  Hz, 1H), 2.56 (dd,  $J = 11.6, 6.8$  Hz, 1H), 2.49 (dd,  $J = 11.2, 6.8$  Hz, 1H), 1.87 (m, 1H), 1.0 (d,  $J = 6.8$  Hz, 6H), 0.98 (s, 9H), 0.19 (s, 3H), 0.17 (s, 3H);

**<sup>13</sup>C-NMR** (CDCl<sub>3</sub>, 100 MHz):  $\delta$  (ppm) 144.2(3), 128.8(6), 127.9(6), 127.1(3), 86.7, 71.2, 66.6, 58.2, 54.2, 28.4, 26.0(3), 20.8, 18.1(2), -4.3, -4.7;

**HRMS** m/z Calculated for C<sub>32</sub>H<sub>45</sub>NO<sub>2</sub>Si 504.3298 (M+H)<sup>+</sup>, found 504.3245.

**(S)-N-(2-(tert-Butyldimethylsilyloxy)-3-(trityloxy)propyl)-N-isobutylethanesulfonamide (18)**

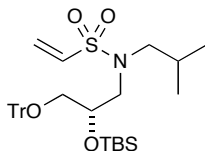

$[\alpha]^{23} -23.0$  (c 2.25, CH<sub>2</sub>Cl<sub>2</sub>) Colorless oil;

**FTIR** (neat): 3058, 2956, 1329, 1144, 993, 788 cm<sup>-1</sup>;

**<sup>1</sup>H-NMR** (CDCl<sub>3</sub>, 400 MHz):  $\delta$  (ppm) 7.52-7.26 (aromatic H, 15H), 6.36 (dd,  $J = 16.4, 9.6$  Hz, 1H), 6.19 (d,  $J = 16.4$  Hz, 1H), 5.85 (d,  $J = 9.6$  Hz, 1H), 4.18 (dddd,  $J = 23.4, 16.3, 10.3, 5.2$  Hz, 1H), 3.50 (dd,  $J = 14.1, 6.0$  Hz, 1H), 3.17 (overlap, 3H), 2.95 (d,  $J = 8.0$  Hz, 2H), 1.94 (m, 1H), 0.95 (s, 9H), 0.88 (d,  $J = 6.5$  Hz, 3H), 0.86 (d,  $J = 6.5$  Hz, 3H), 0.17 (s, 3H), 0.14 (s, 3H);

**<sup>13</sup>C-NMR** (CDCl<sub>3</sub>, 100 MHz):  $\delta$  (ppm) 143.9, 135.3, 128.8(3), 127.8(6), 127.1(6), 126.0(3), 86.6, 71.3, 65.6, 56.7, 51.7, 27.4, 26.0(3), 25.7, 20.0, 18.1, -3.5, -4.6;

**HRMS** m/z Calculated for C<sub>34</sub>H<sub>47</sub>NO<sub>4</sub>SiSNa 616.2893 (M+Na)<sup>+</sup>, found 616.2880.

### 5,1,2-Oxathiazepine-2-isobutyl-4(S)-(trityloxymethyl)-1,1-dioxide (19)

2-Chloroethanesulfonyl chloride (120 mg, 1.05 equiv.) was slowly added to a stirred solution of (S)-2-(*tert*-butyldimethylsilyloxy)-*N*-isobutyl-3-(trityloxy)propan-1-amine **17** (350 mg, 1.0 equiv.) in CH<sub>2</sub>Cl<sub>2</sub> at 0 °C, and stirring was continued at 0 °C for 2 hours. The mixture was diluted with 20 ml CH<sub>2</sub>Cl<sub>2</sub>, washed with brine (sat'd, 2x10 ml), dried (MgSO<sub>4</sub>), concentrated under reduced pressure to afford crude vinyl sulfonamide **18** in a yield of 71.4% over three steps. After purification, several drops of TBAF in THF (1.0 M in THF) were added to the stirred solution of vinyl sulfonamide **18** (25 mg, 0.04 mmol) in THF (2ml). Stirring was continued for 2 hrs at room temperature, NH<sub>4</sub>Cl (3ml, sat'd) was added and the organic layer was extracted by CH<sub>2</sub>Cl<sub>2</sub> (2x4ml) and dried (MgSO<sub>4</sub>). The solvent was removed under reduced pressure and the crude product was purified by flash column chromatography (Hexane/EtOAc = 4:1) to yield sultam **19** (18.6 mg) in a yield of 92%.

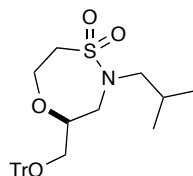

$[\alpha]^{23}_{D}$  -10.37 (c = 4.92, CH<sub>2</sub>Cl<sub>2</sub>) Colorless oil;

**FTIR** (neat): 2958, 1448, 1337, 1144, 705 cm<sup>-1</sup>;

**<sup>1</sup>H-NMR** (CDCl<sub>3</sub>, 400 MHz): δ (ppm) 7.49-7.27 (aromatic H, 15H), 4.25 (m, 2H), 3.85 (m, 1H), 3.41-3.11 (overlap, 5H), 3.07 (overlap, 3H), 1.86 (m, 1H), 0.97 (d, *J* = 6.6 Hz, 3H), 0.97 (d, *J* = 6.6 Hz, 3H);

**<sup>13</sup>C-NMR** (CDCl<sub>3</sub>, 100 MHz): δ (ppm) 143.6 (3), 128.6 (6), 128.0 (6), 127.2 (3), 86.8, 78.8, 64.5, 63.0, 56.2, 54.8, 46.6, 27.0, 19.9 (2);

**HRMS** m/z Calculated for C<sub>28</sub>H<sub>33</sub>NNaO<sub>4</sub>SNa 502.2028 (M+Na)<sup>+</sup>, found 502.2005.

***N*-(iso-Butyl)-4-(*S*)-(tert-butyldimethylsilyloxy)-5-(*R*)-hydroxy-6-methylene-1,2-thiazine, tetrahydro-1,1-dioxide (22)**

To a solution of **18** (24 mg, 0.04 mmol) in CH<sub>2</sub>Cl<sub>2</sub> at -10 °C was added several drops of Me<sub>2</sub>AlCl (1 M in CH<sub>2</sub>Cl<sub>2</sub>), stirring was continued until TLC analysis indicated that trityl-deprotection was complete. A brine solution (5ml) was added to the reaction mixture, the organic layer was extracted by CH<sub>2</sub>Cl<sub>2</sub> (2x5 ml), dried (MgSO<sub>4</sub>) and partially concentrated under reduced pressure. To the crude mixture in CH<sub>2</sub>Cl<sub>2</sub>, was added the Dess-Martin agent (34.3 mg, 2.0 equiv.). The reaction mixture was washed with NaHCO<sub>3</sub> (sat'd, aq.), the organic layer was dried (MgSO<sub>4</sub>) and partially concentrated under reduced pressure to yield aldehyde vinyl sulfonamide **21**. To a stirred solution of **21** in CH<sub>2</sub>Cl<sub>2</sub> was added DABCO (0.4 mg, 0.10 equiv.) and the reaction was monitored until TLC analysis indicated that the starting material was consumed (normally 2 to 4 hrs). The solvent was removed under reduced pressure and the crude product was purified by flash column chromatography to afford the 6-membered ring sultam **22** in a yield of 71% over three steps with *dr* ratio is more than 95:5.

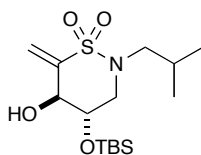

[ $\alpha$ ]<sup>23</sup> 19.7 (c 0.30, CH<sub>2</sub>Cl<sub>2</sub>) Colorless oil;

FTIR (neat): 3508, 2956, 1340, 1132, 839, 779 cm<sup>-1</sup>;

<sup>1</sup>H-NMR (CDCl<sub>3</sub>, 400 MHz):  $\delta$  (ppm) 6.04 (s, 1H), 5.88 (s, 1H), 4.55 (dd, *J* = 6.8, 2.5 Hz, 1H), 3.70 (ddd, *J* = 16.4, 7.2, 4.5 Hz, 1H), 3.40 (m, 2H), 3.02 (dd, *J* = 13.6, 7.2 Hz, 1H), 2.94 (d, *J* = 3.0 Hz, 1H), 2.76 (dd, *J* = 14.0, 7.2 Hz, 1H), 1.83 (m, 1H), 0.93 (d, *J* = 8.8 Hz, 3H), 0.92 (d, *J* = 8.8 Hz, 3H), 0.92 (s, 9H), 0.17 (s, 3H), 0.15 (s, 3H);

<sup>13</sup>C-NMR (CDCl<sub>3</sub>, 100 MHz):  $\delta$  (ppm) 143.4, 118.1, 74.9, 73.1, 57.0, 51.1, 28.2, 25.6(3), 19.9(2), 17.9, -4.7(2);

(For stereochemistry assignment, benzene-*d*<sub>6</sub> was used as NMR solvent instead of CDCl<sub>3</sub>)

HRMS *m/z* Calculated for C<sub>15</sub>H<sub>31</sub>NO<sub>4</sub>SiNa 372.1641 (M+Na)<sup>+</sup>, found 372.1625.



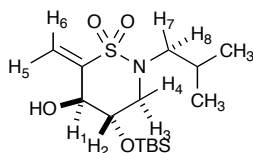

**Table of data:**

Assignments of  $^1\text{H}$  and  $^{13}\text{C}$  chemical shifts were based on  $^1\text{H}$ ,  $^{13}\text{C}$ , DEPT, COSY, NOESY, HSQC and HMBC NMR spectra.

| Protons | $^1\text{H}$ chemical shift (ppm) | $^{13}\text{C}$ chemical shift (ppm) |
|---------|-----------------------------------|--------------------------------------|
| H1      | 4.51                              | 74.9                                 |
| H2      | 3.70                              | 73.1                                 |
| H3      | 3.42                              | 51.1                                 |
| H4      | 3.42                              | 51.1                                 |
| H5      | 5.88                              | 143.4                                |
| H6      | 6.04                              | 143.4                                |
| H7      | 2.76                              | 57.0                                 |
| H8      | 3.03                              | 57.0                                 |

**6,1,2-Oxathiazepine-*N*-(iso-Butyl)-4-(*S*)-(tert-butyl dimethylsilyloxy)-1,1-dioxide (23)**

To the solution of alcohol vinyl sulfonamide (30 mg, 1 equiv.) in THF was added NaH (3.4 mg, 60% dispersion in mineral oil, 1.0 equiv.), stirring was continued until TLC showed the starting material disappeared. 1N HCl was added drop wise to neutralized resulting base, then  $\text{CH}_2\text{Cl}_2$  (2 x 3ml) was added to extract the organic layer, the organic layers were combined, dried ( $\text{MgSO}_4$ ), concentrated under reduced pressure, and purified by flash chromatography (Hexane/EtOAc = 2:1) to afford 25.4 mg of the 8-membered-ring sultam **23** in a yield of 84%.

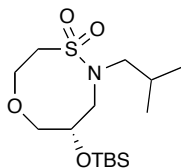

$[\alpha]^{23}$  -11.2 (c 0.56,  $\text{CH}_2\text{Cl}_2$ ) Colorless oil;

FTIR (neat): 2929, 1339, 1252, 1142, 1113, 837, 777  $\text{cm}^{-1}$ ;

$^1\text{H-NMR}$  ( $\text{CDCl}_3$ , 400 MHz):  $\delta$  (ppm) 4.26 (ddd,  $J = 13.8, 4.9, 4.8$  Hz, 1H), 4.11 (dddd,  $J = 9.8, 5.0, 4.9, 4.8$  Hz, 1H), 3.83 (ddd,  $J = 16.3, 8.6, 2.7$  Hz, 1H), 3.65 (d,  $J = 4.8$  Hz, 2H), 3.35 (m,

4H), 3.07 (d,  $J = 7.5$  Hz, 2H), 1.88 (m, 1H), 0.98 (d,  $J = 6.8$  Hz, 3H), 0.95 (d,  $J = 6.8$  Hz, 3H), 0.92 (s, 9H), 0.09 (s, 6H);

$^{13}\text{C-NMR}$  ( $\text{CDCl}_3$ , 100 MHz):  $\delta$  (ppm) 80.1, 64.6, 63.5, 56.4, 54.9, 46.3, 27.1, 25.8(3), 19.9(2), 18.3, -5.4(2);

**HRMS**  $m/z$  Calculated for  $\text{C}_{15}\text{H}_{33}\text{NO}_4\text{SiSNa}$  374.1797 ( $\text{M}+\text{Na}$ ) $^+$ , found 374.1790.





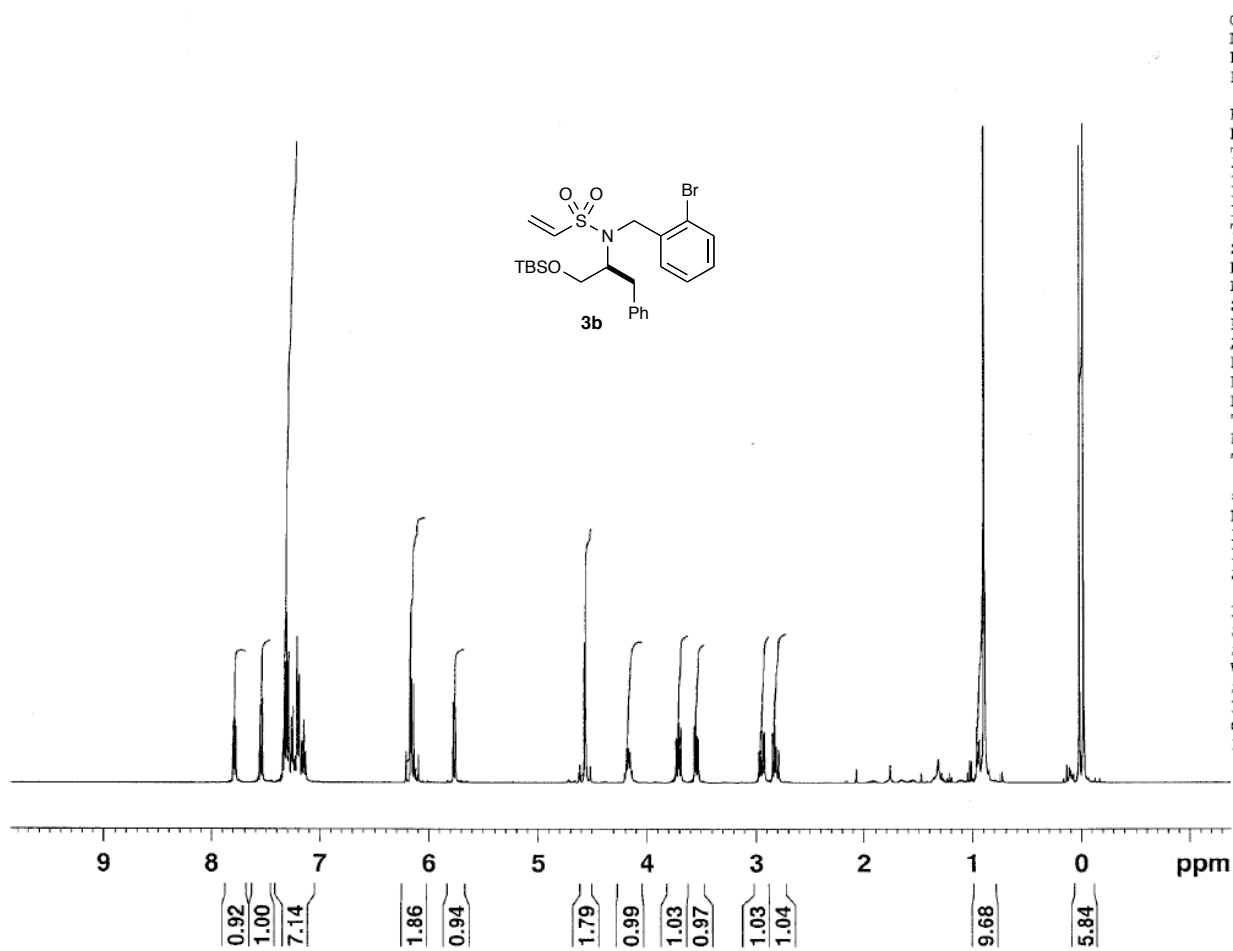

138.23  
137.31  
135.31  
132.42  
130.28  
129.26  
128.86  
128.66  
127.61  
126.76  
126.03  
122.32

77.53  
77.22  
76.90

63.40  
62.60

48.26

36.99

31.64

25.94

22.71

18.23

14.23

-5.49  
-5.51

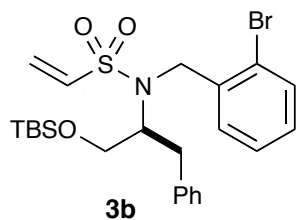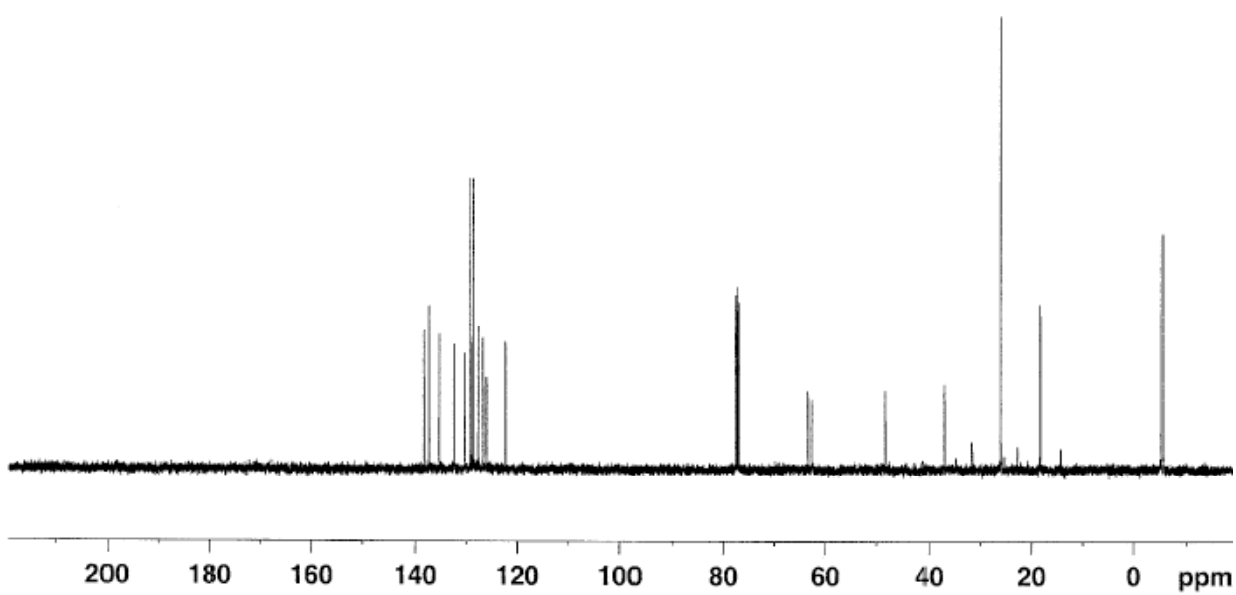



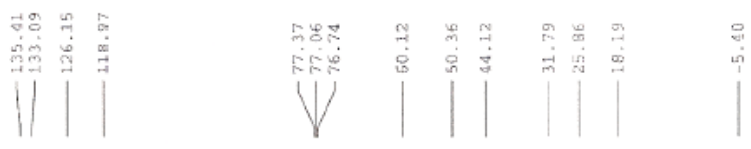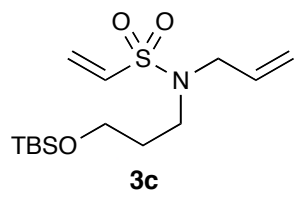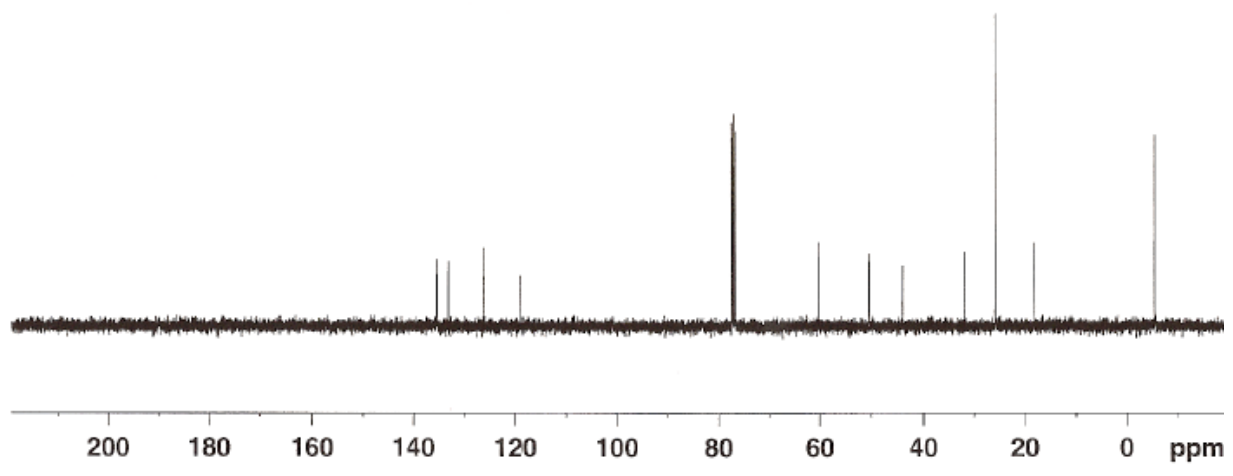



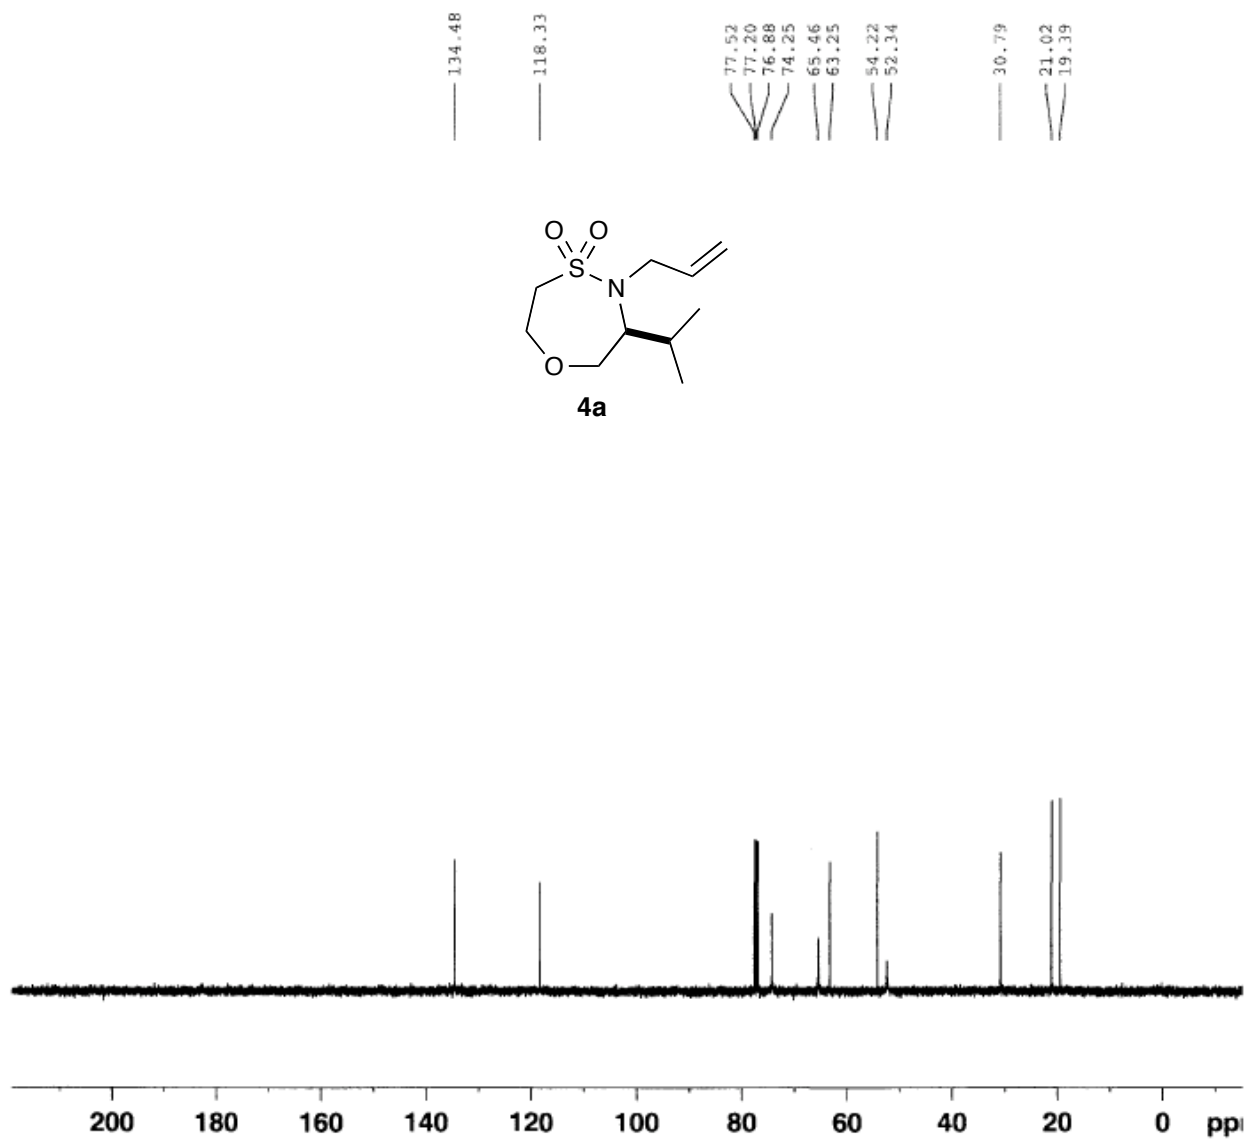

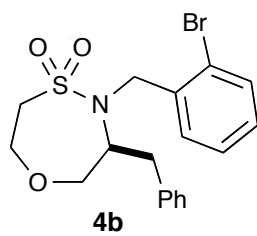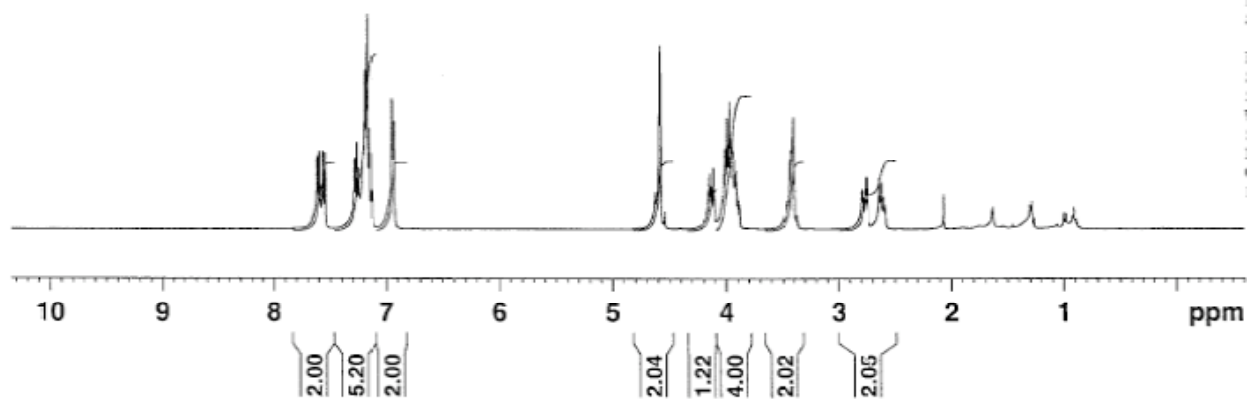

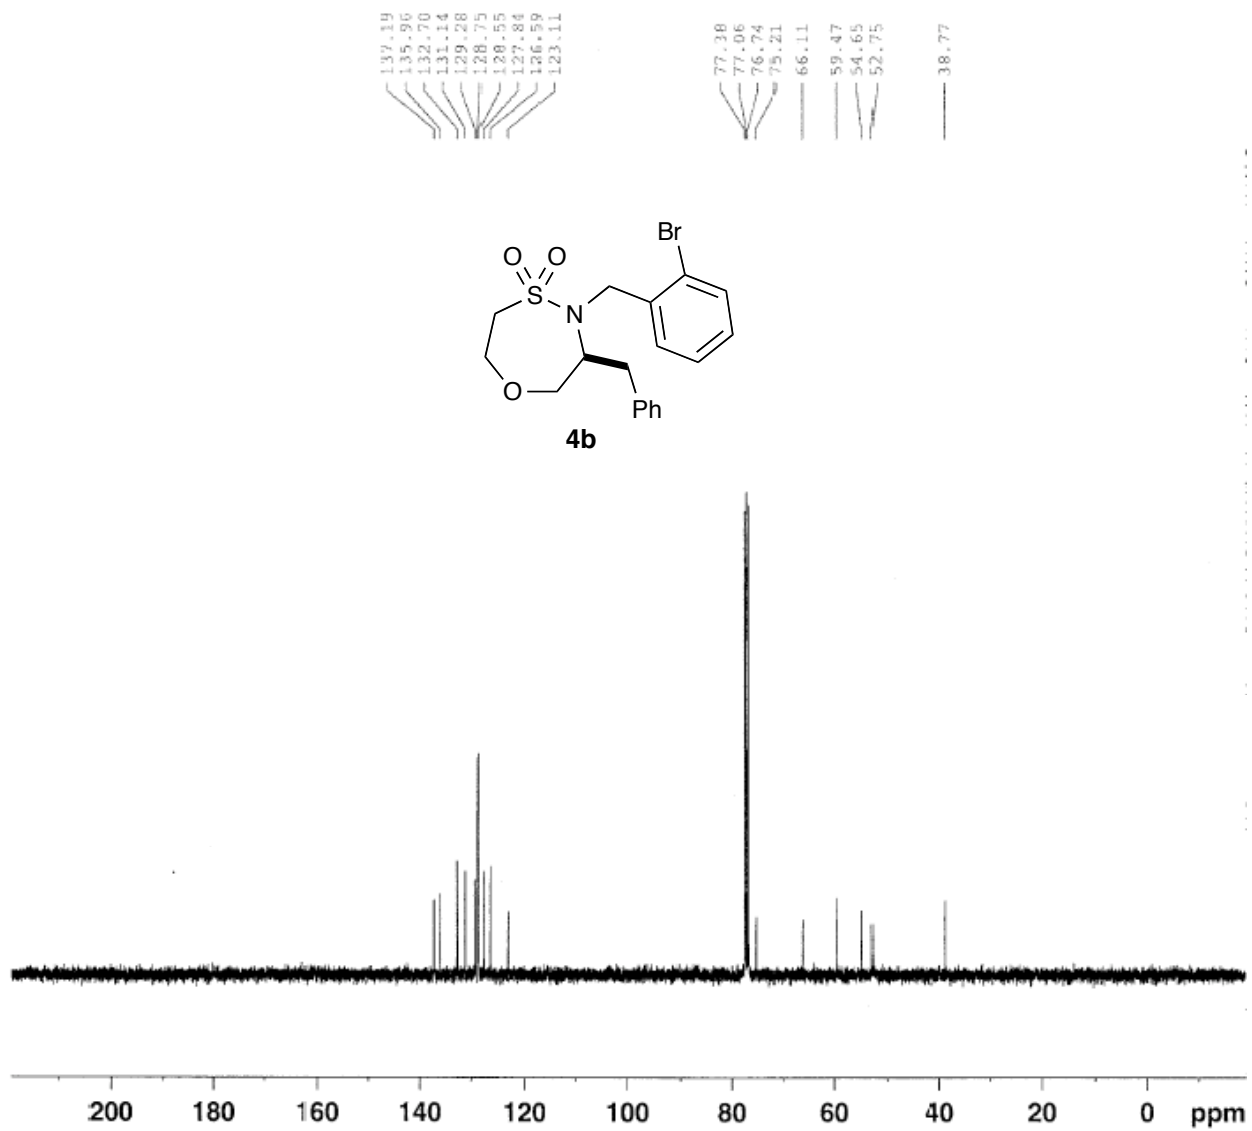

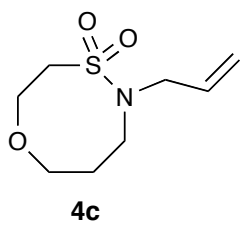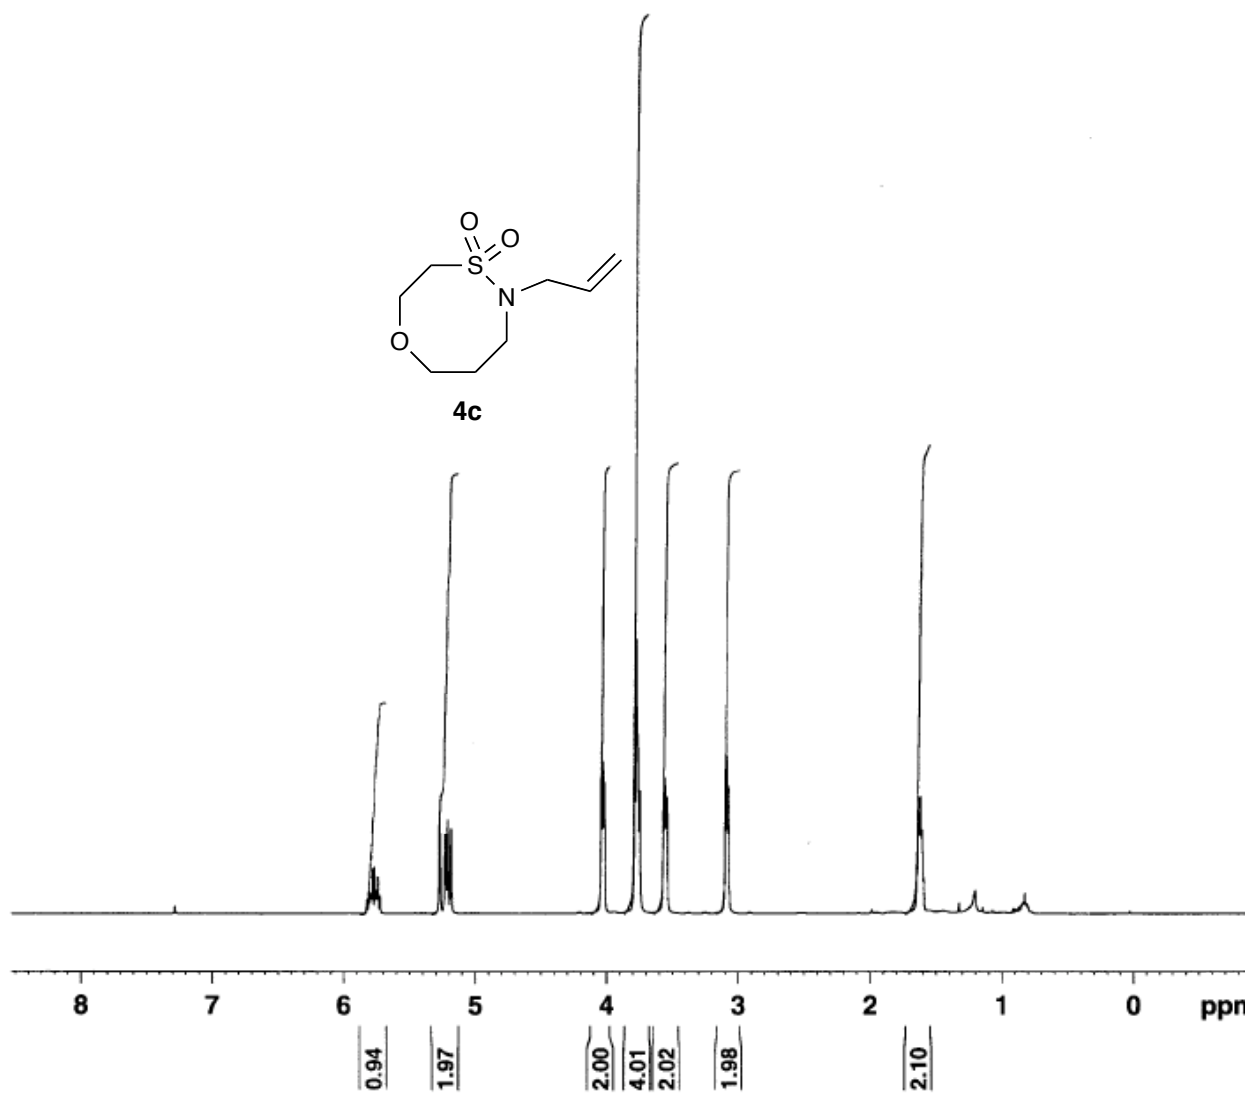

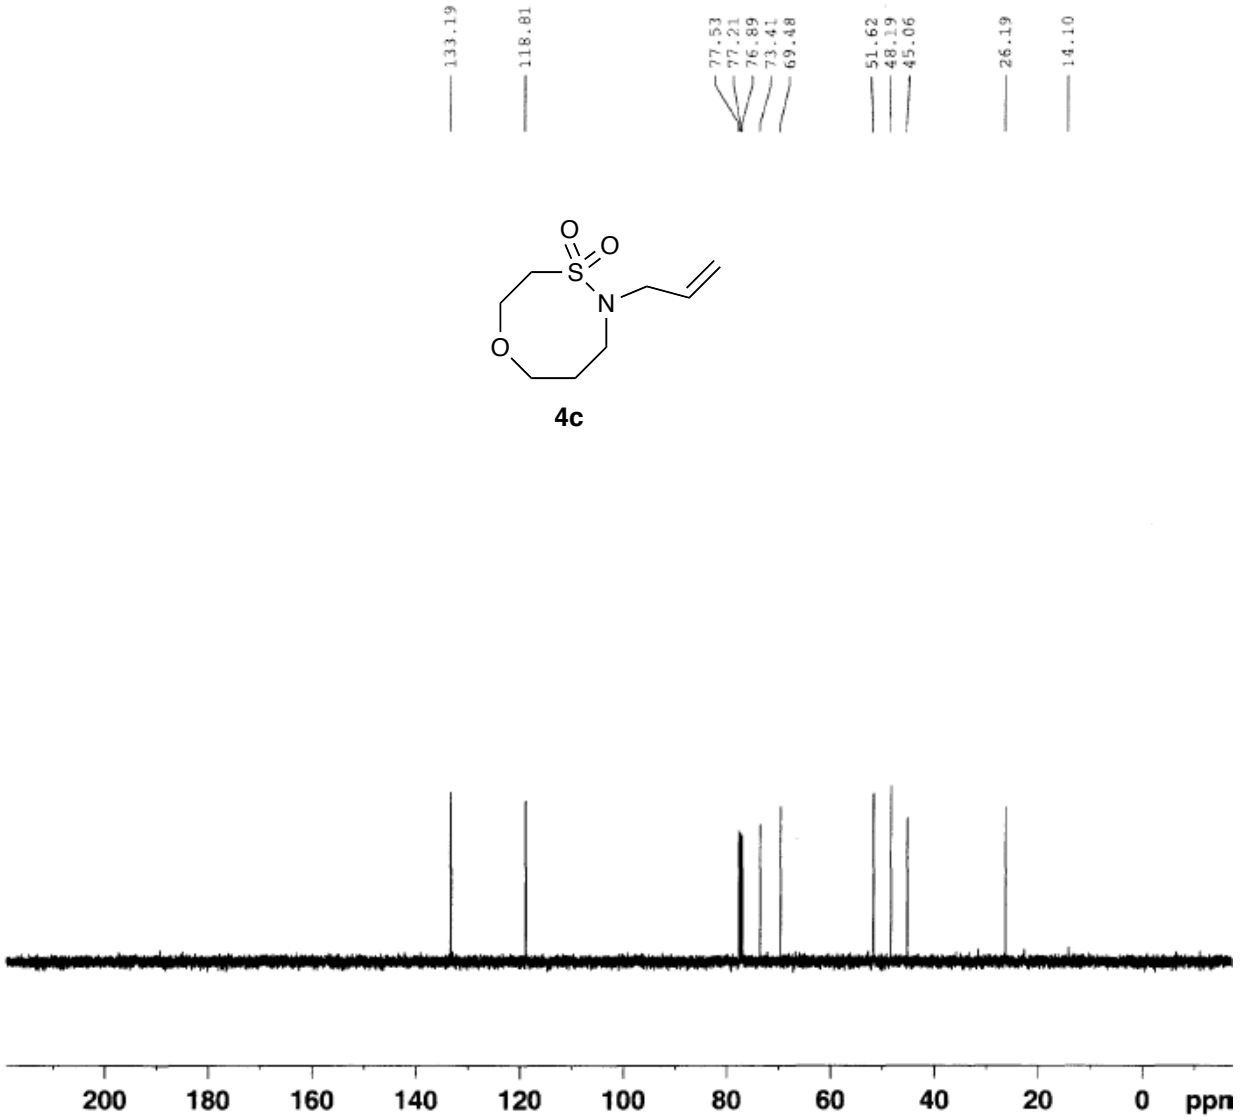

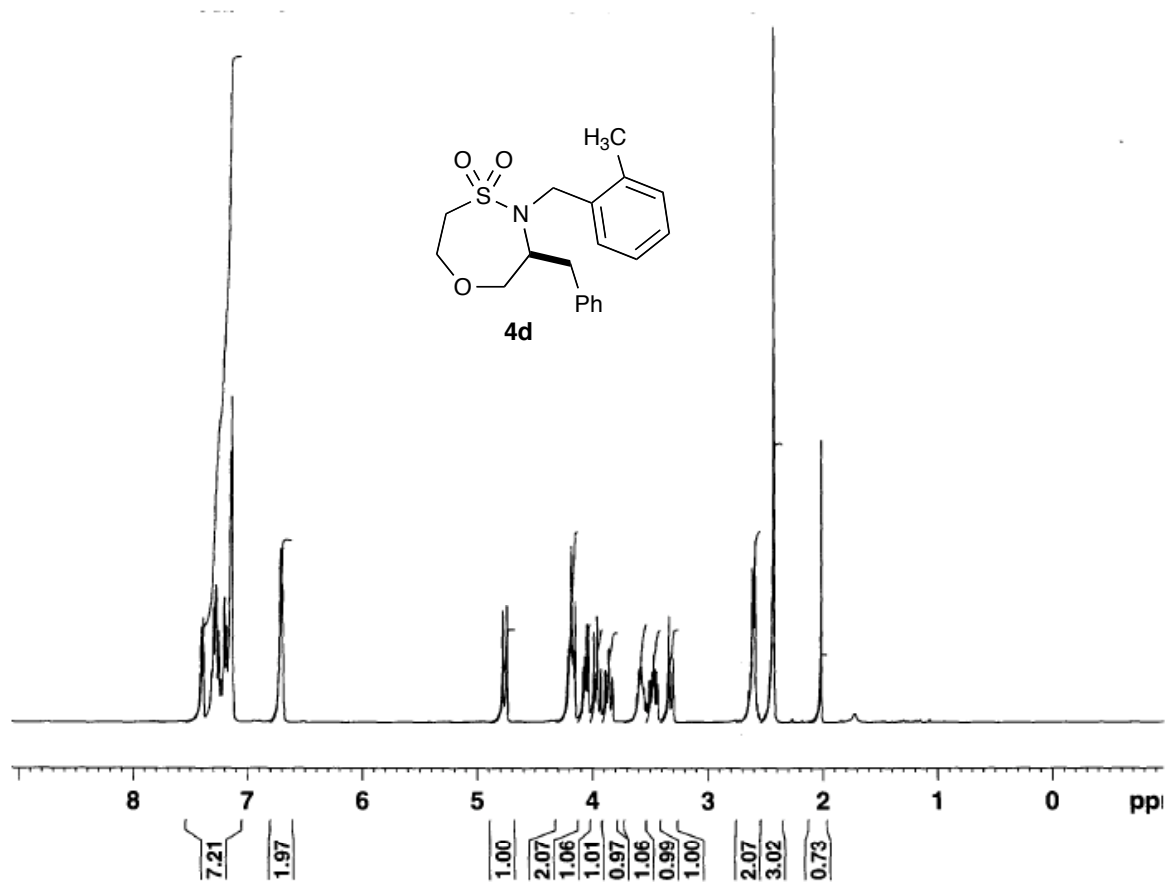

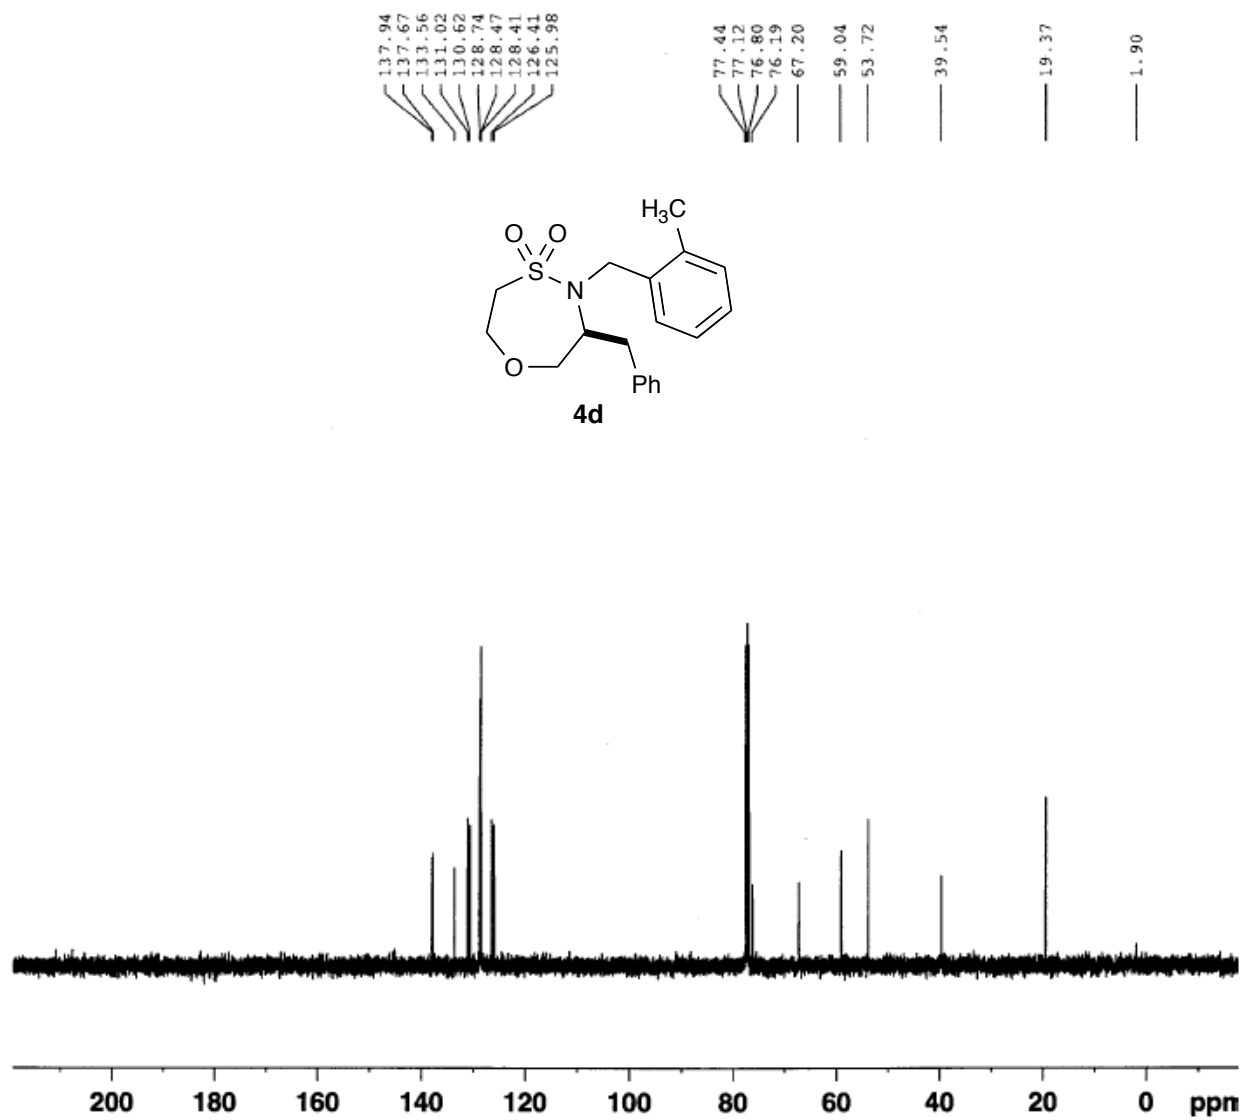

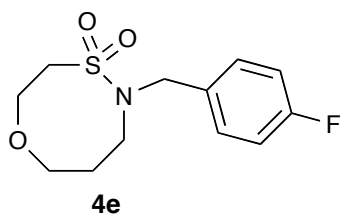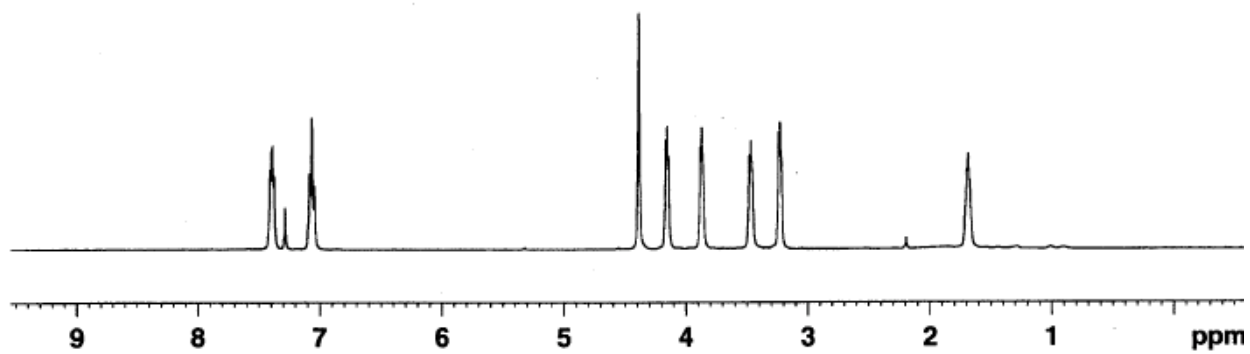



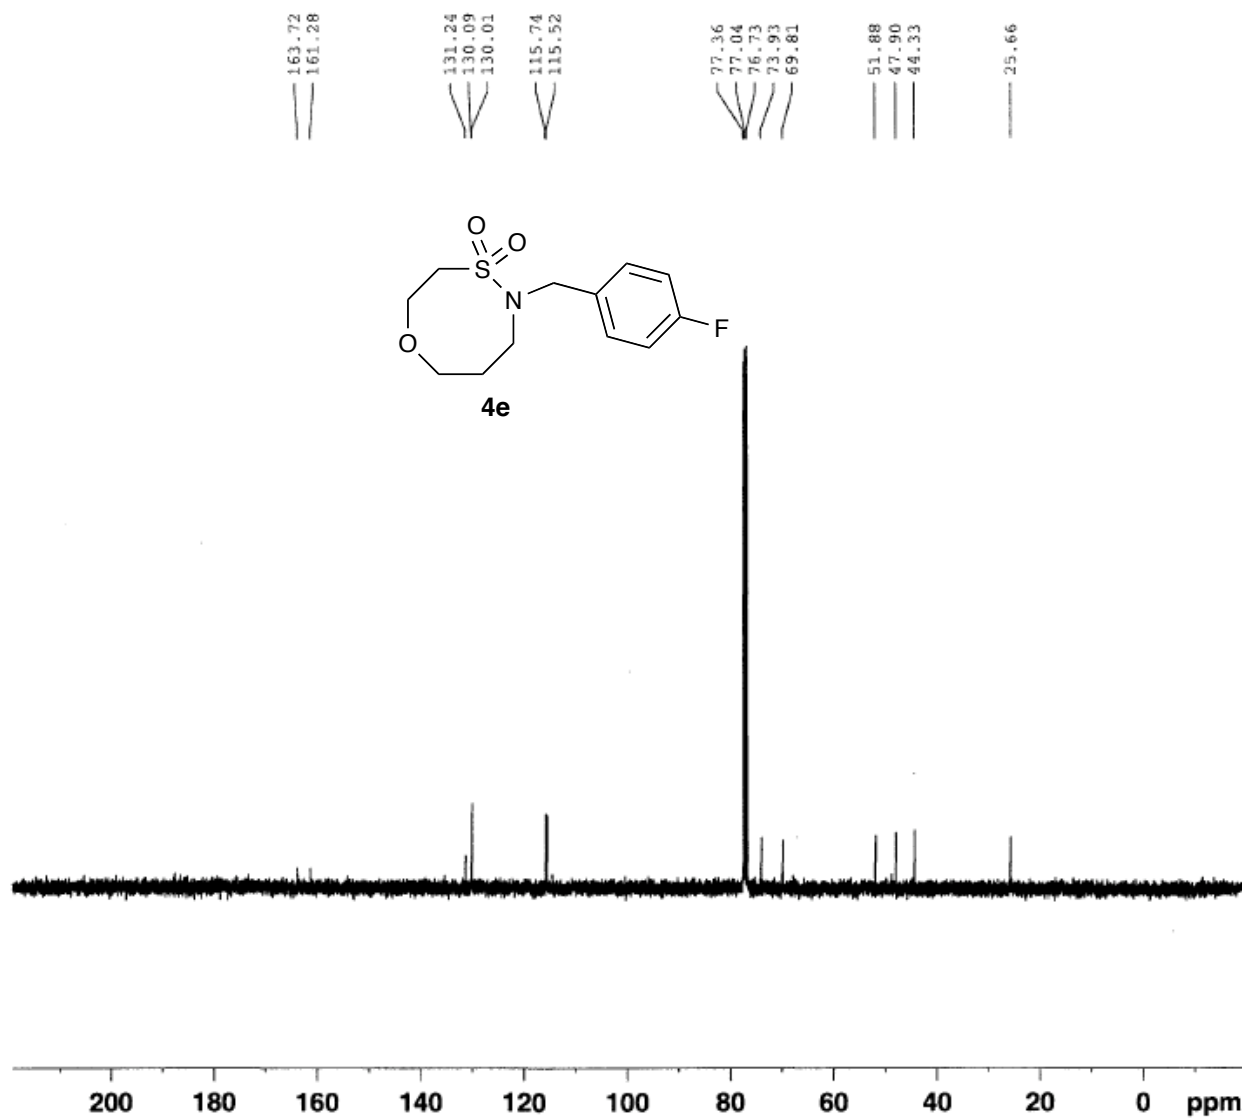

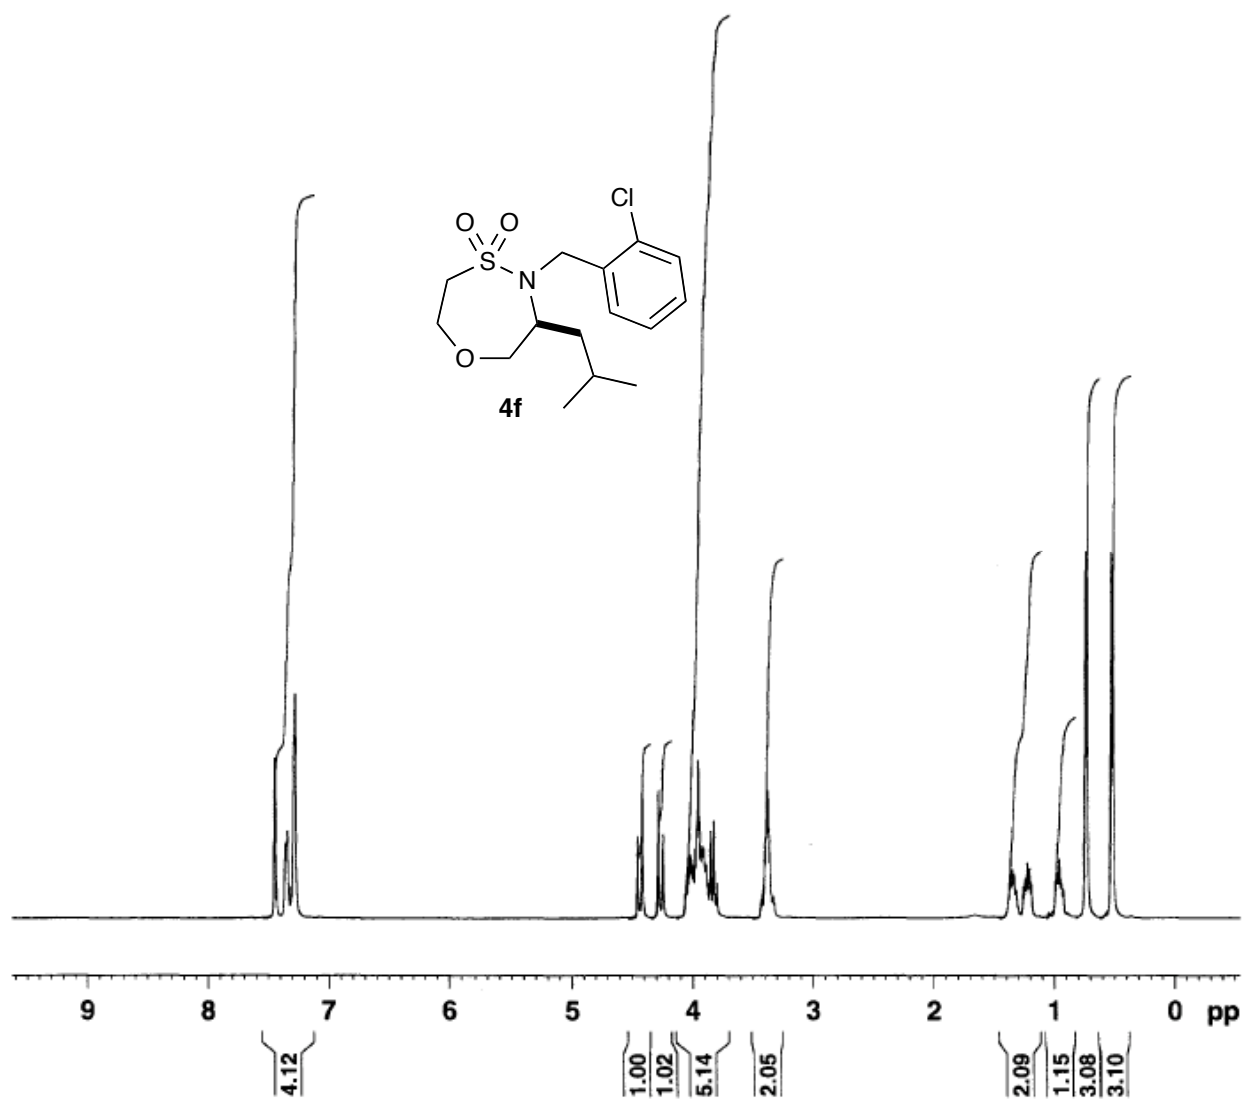

139.75  
134.33  
129.79  
128.51  
127.88  
126.64

77.38  
77.06  
76.74  
74.24

64.56  
55.60  
54.48  
50.92

39.77

24.33  
22.26  
21.88

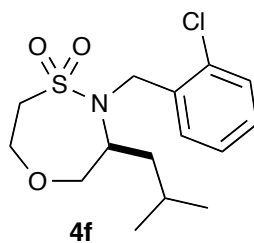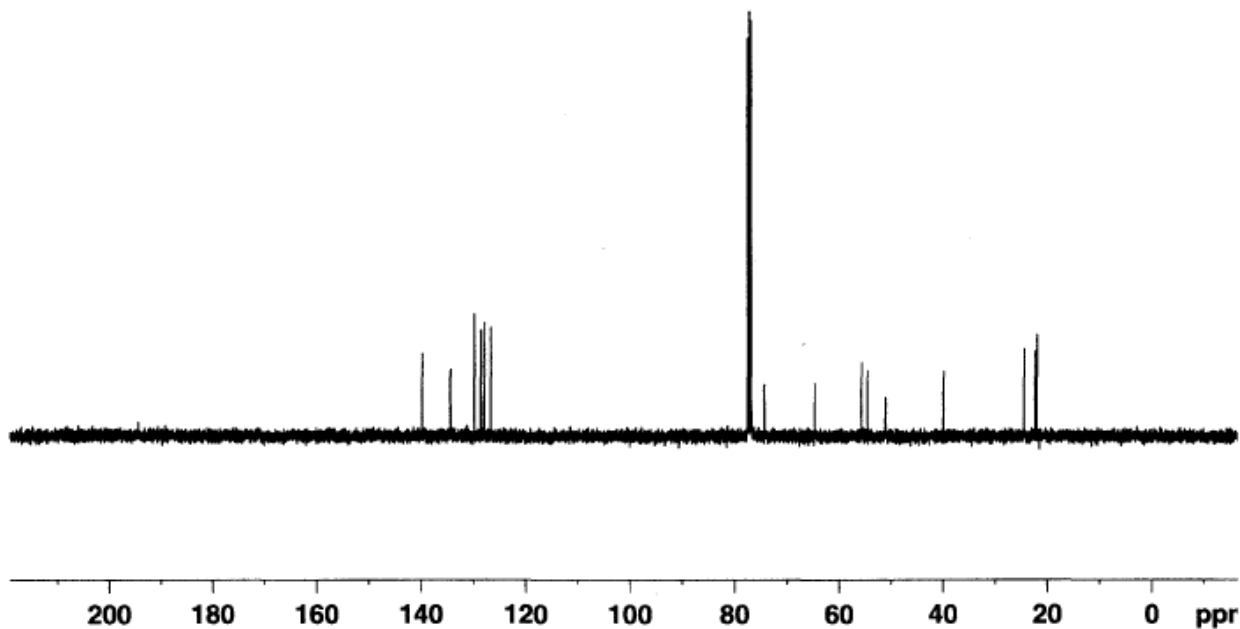

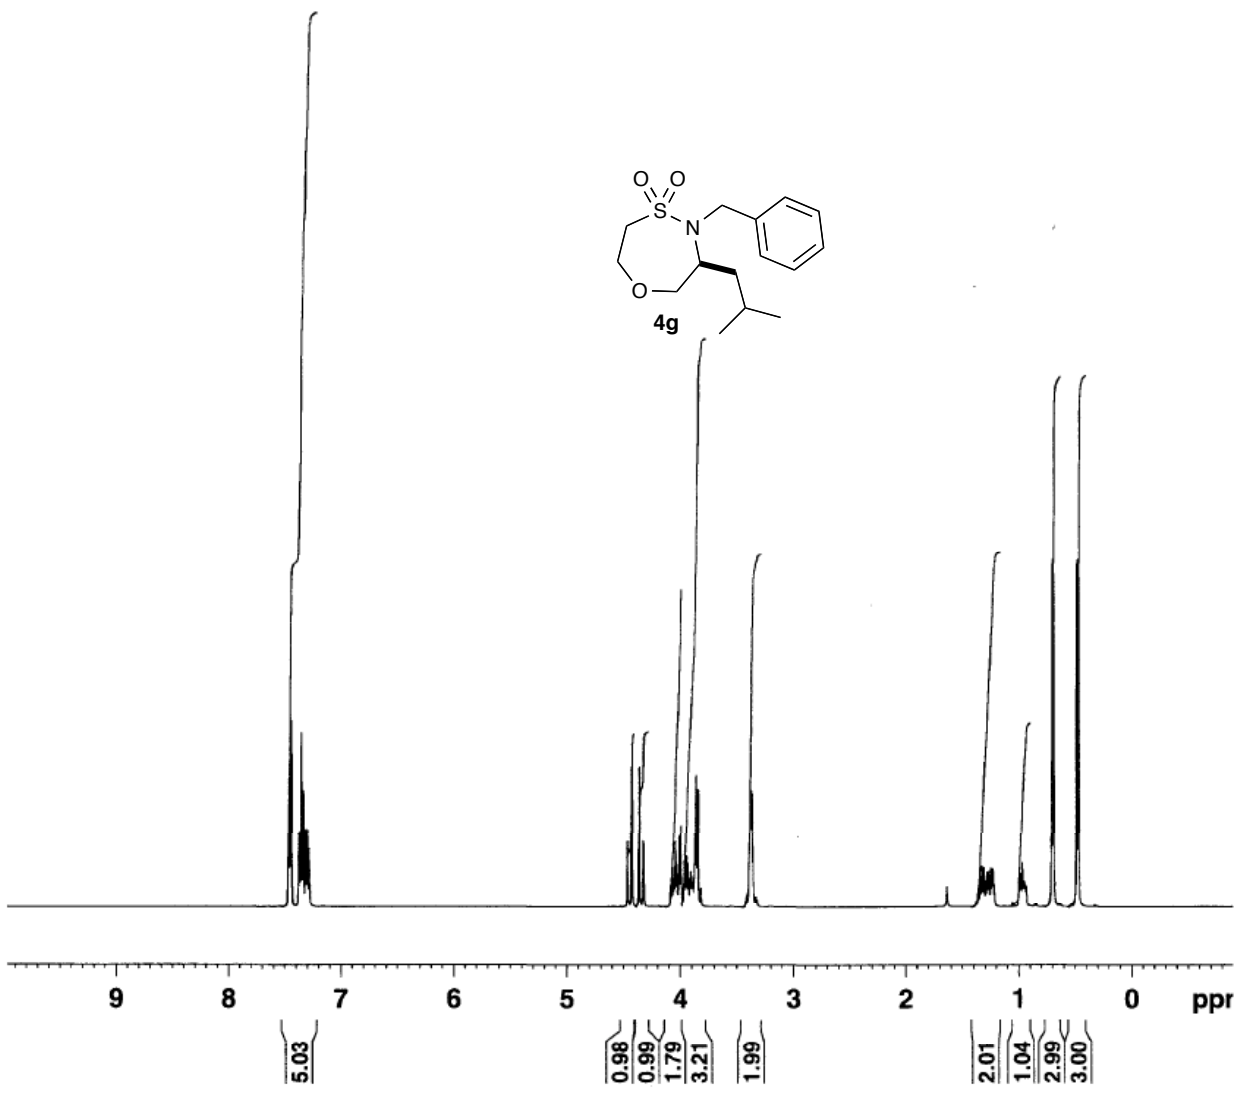

137.39  
128.65  
128.47  
127.74

77.37  
77.06  
76.74  
74.61

64.91  
55.62  
54.85  
51.97

39.96

24.31  
22.19  
21.96

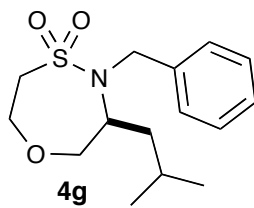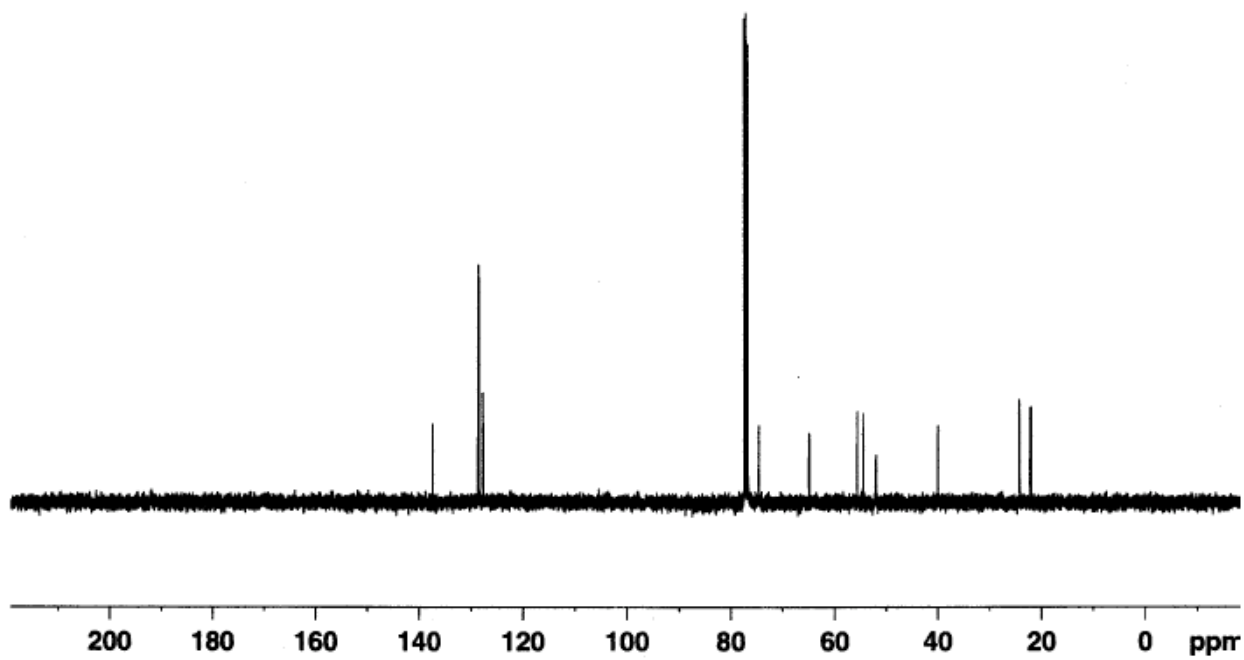

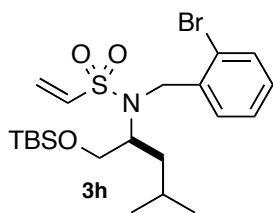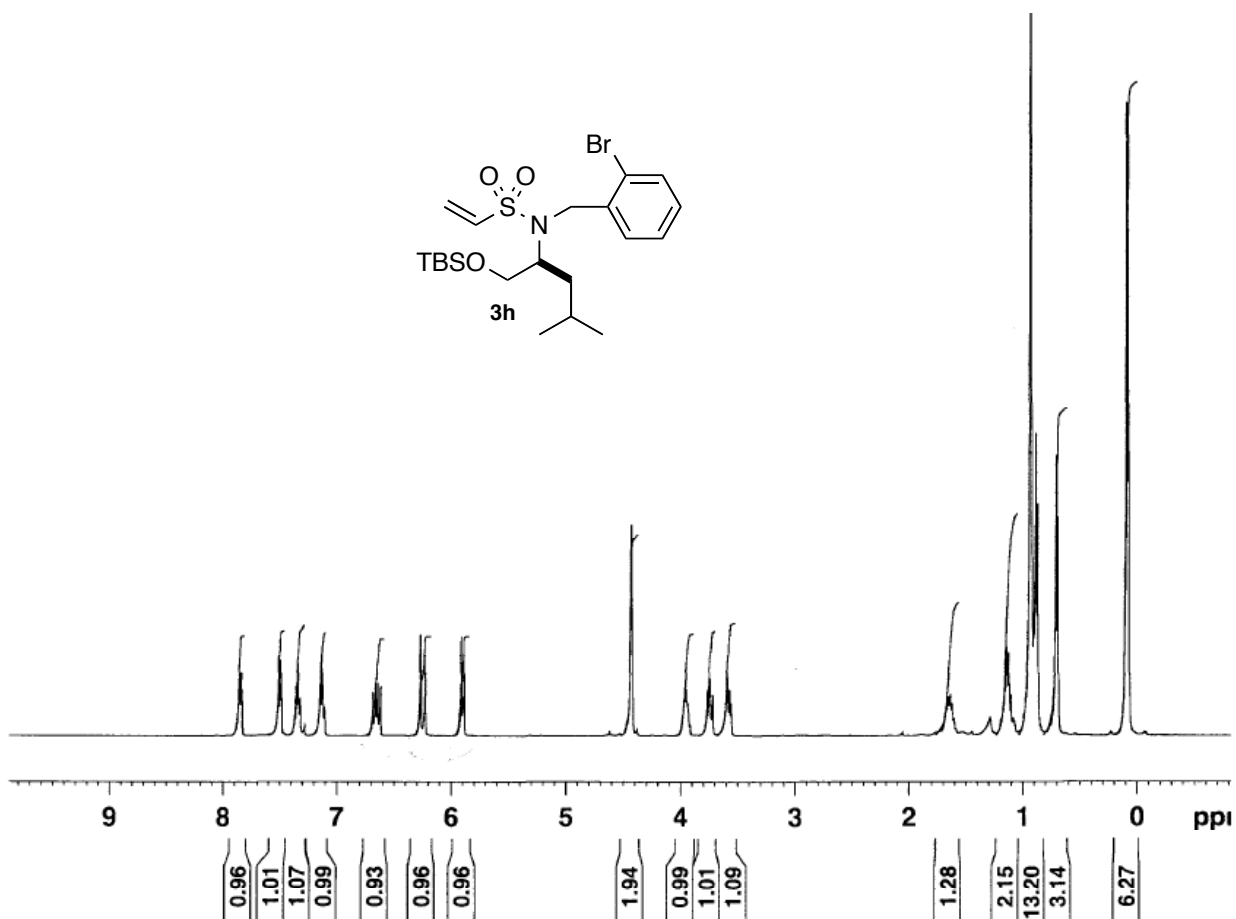

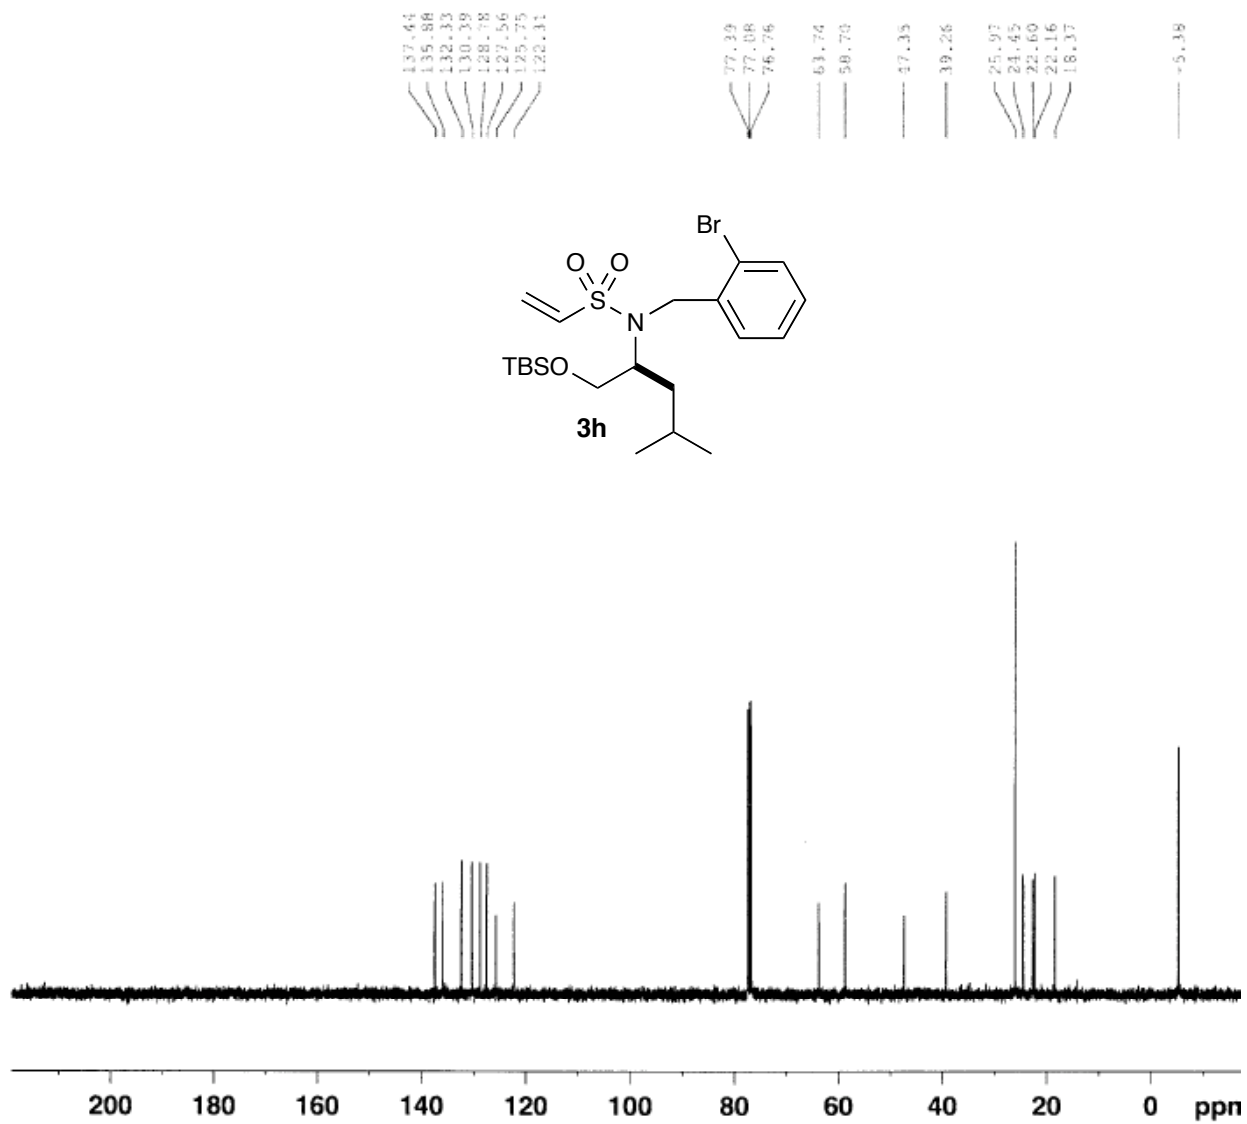





136.83  
 136.13  
 124.61  
 117.01  
 77.52  
 77.20  
 76.88  
 64.39  
 58.01  
 46.44  
 38.89  
 25.86  
 24.20  
 22.94  
 21.95  
 18.23  
 -5.49  
 -5.53

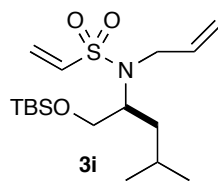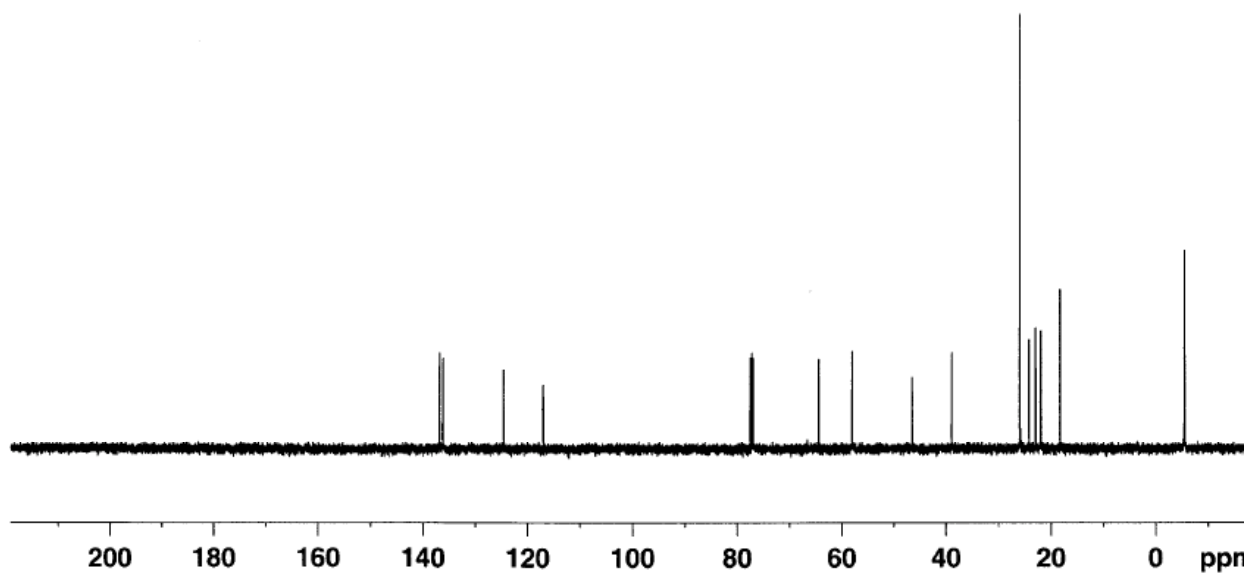

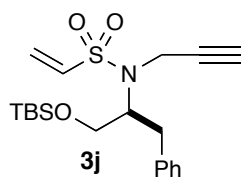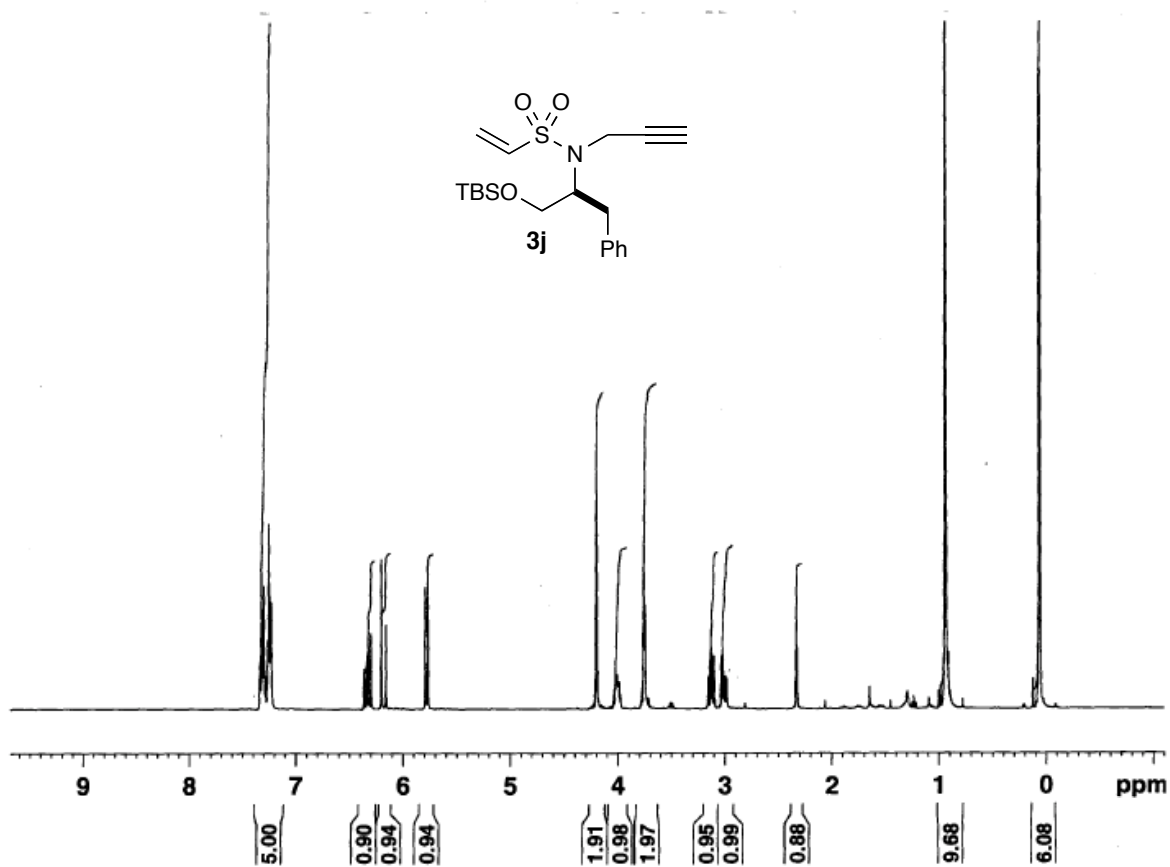

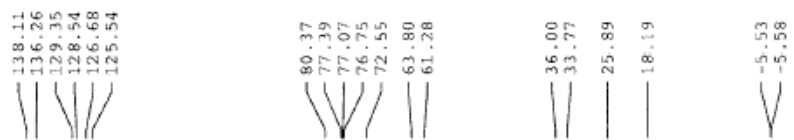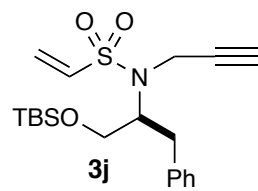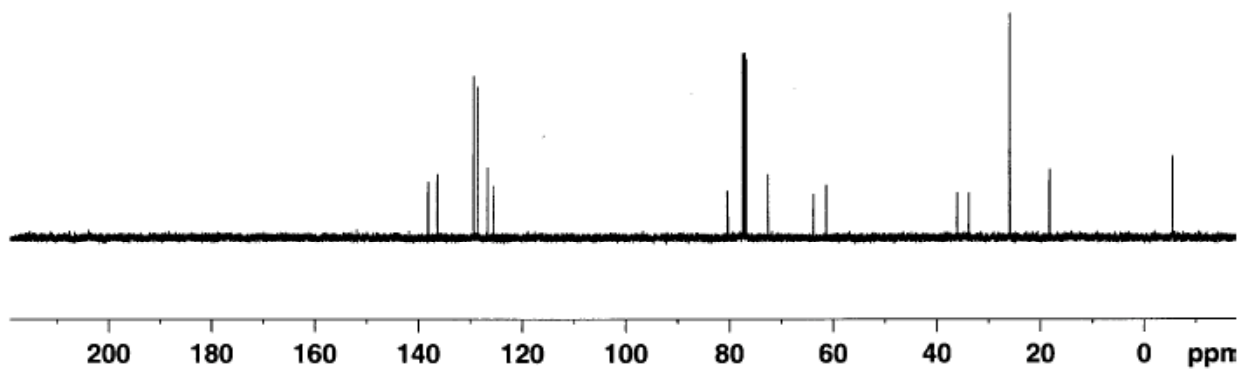



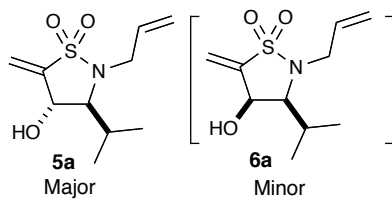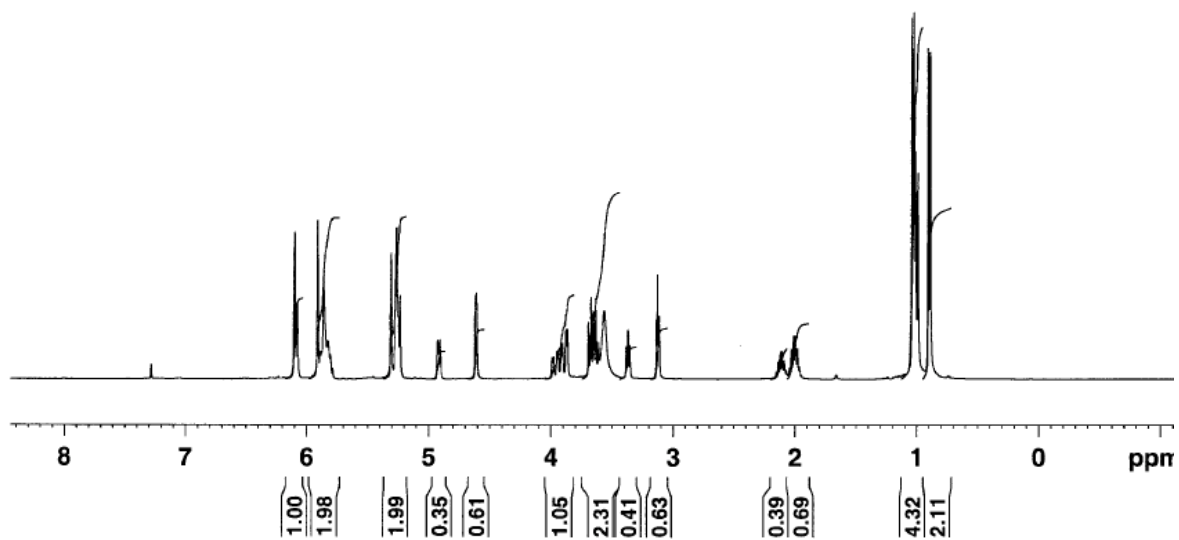

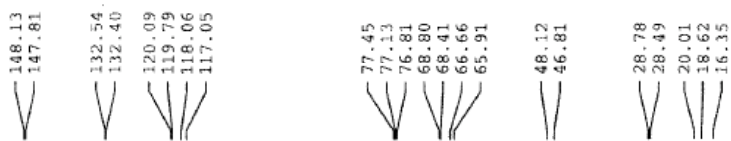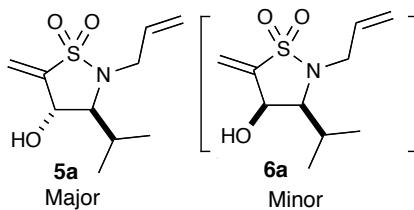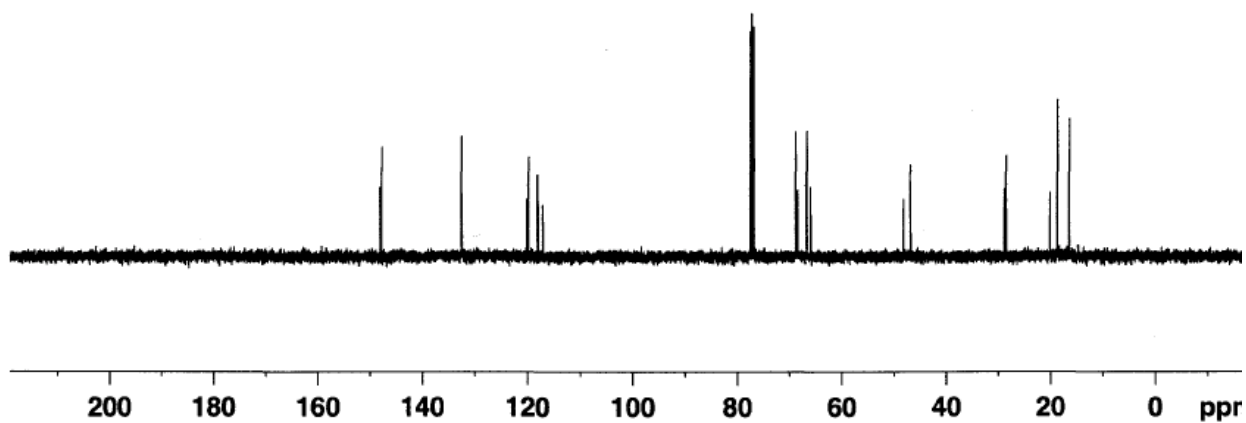

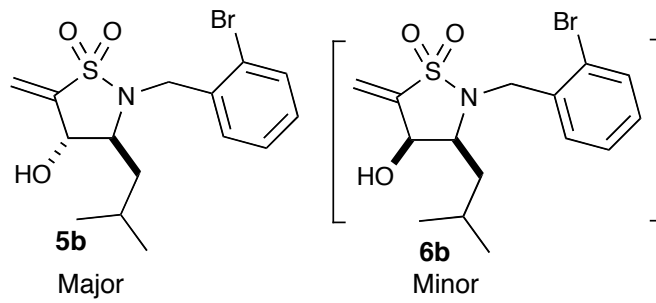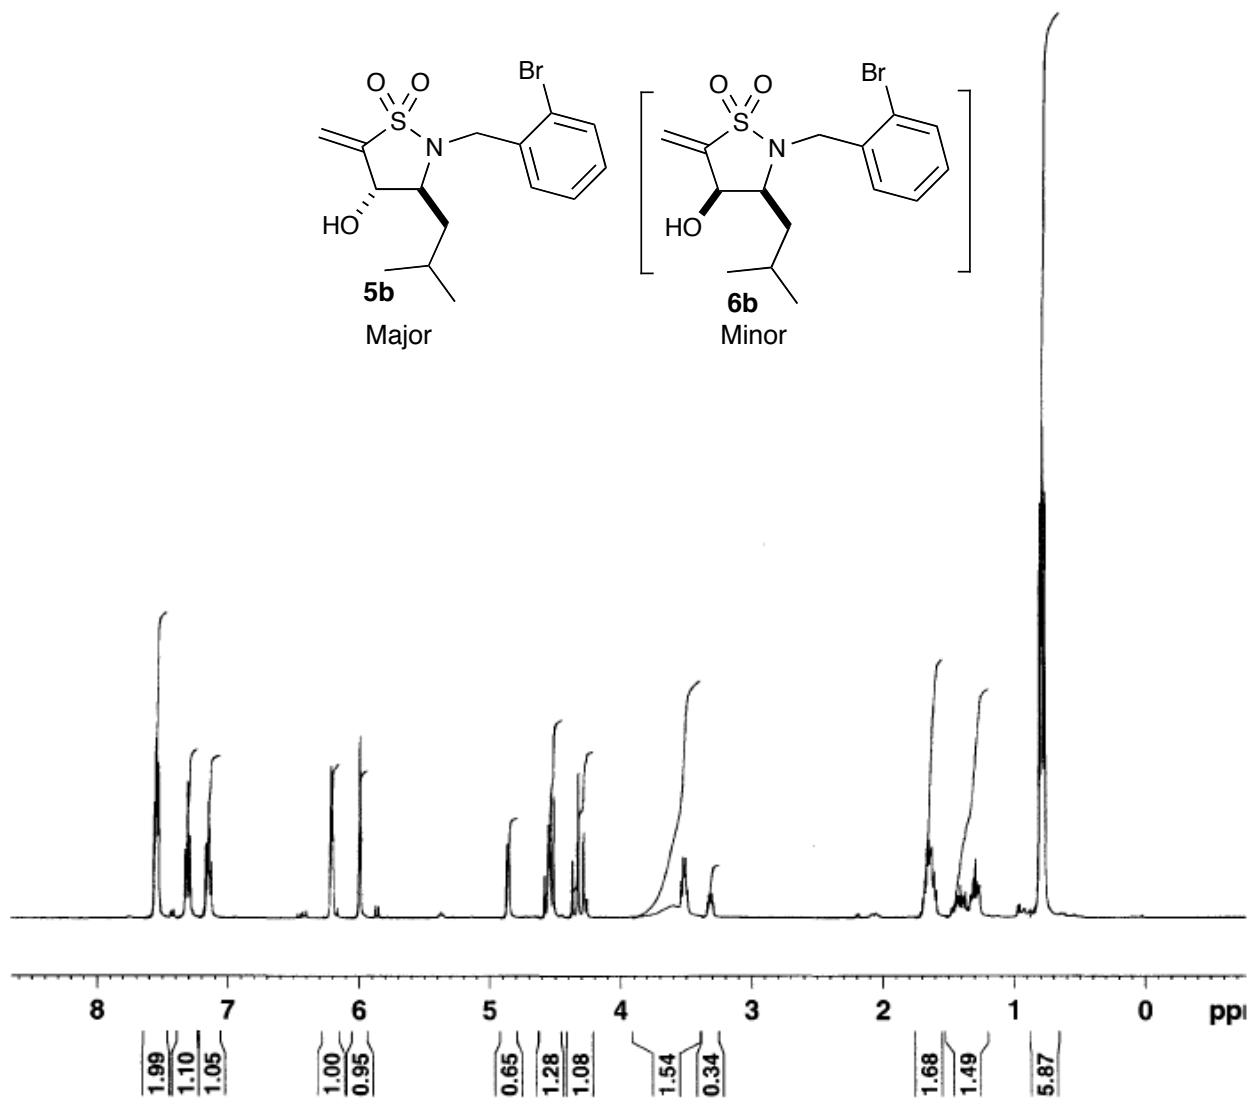

147.78  
147.72  
135.36  
135.04  
132.89  
132.85  
130.44  
130.32  
130.01  
129.45  
129.38  
127.84  
123.22  
123.07  
119.52

77.54  
77.22  
76.90  
71.45  
68.08  
63.68  
60.54  
46.90  
46.46  
40.55  
35.74  
24.71  
24.60  
23.26  
23.09  
22.20  
21.91

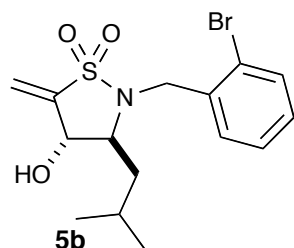

**5b**  
Major

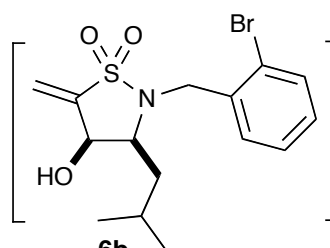

**6b**  
Minor

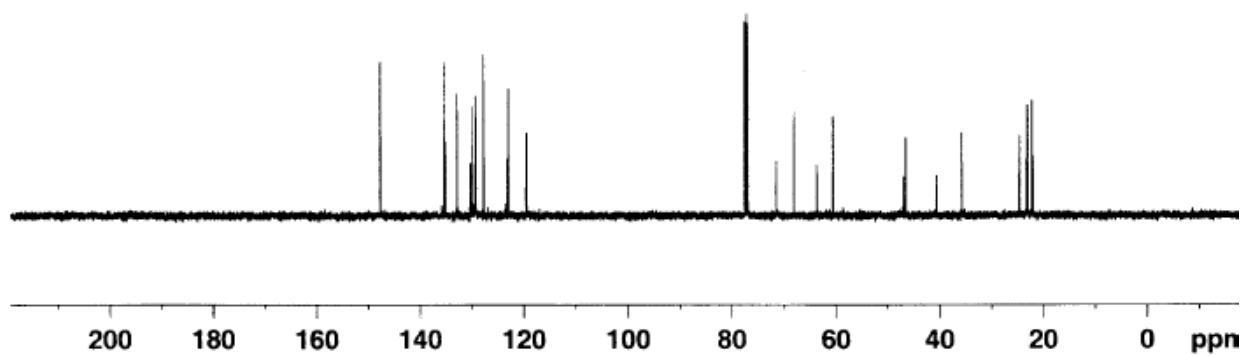



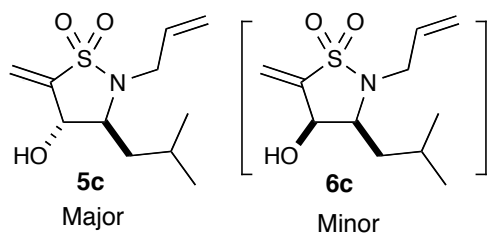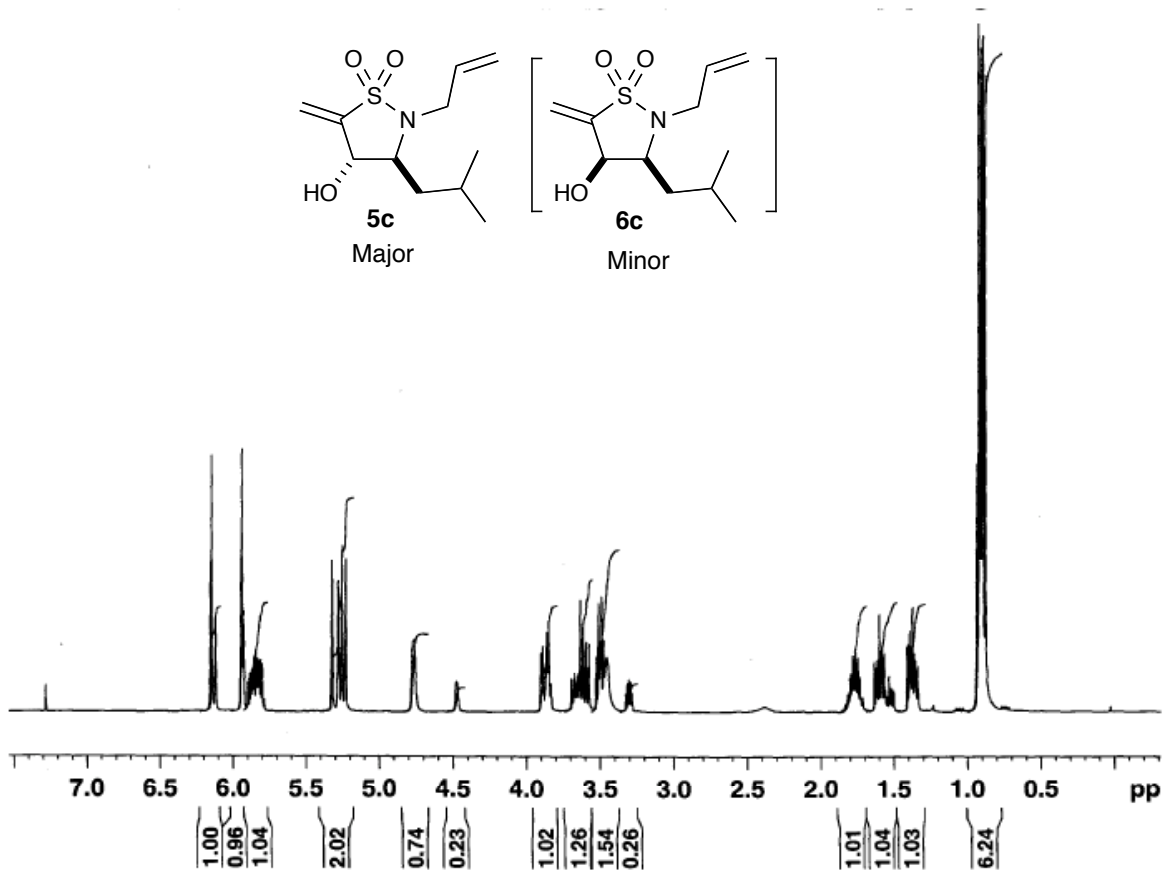

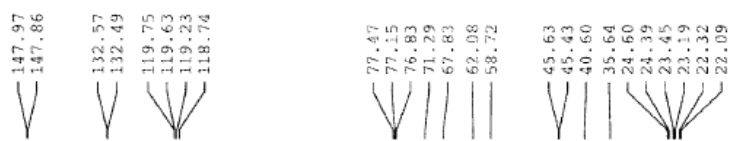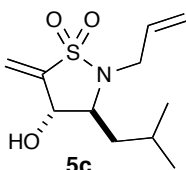

**5c**  
Major

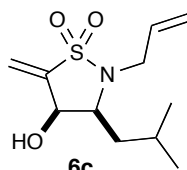

**6c**  
Minor

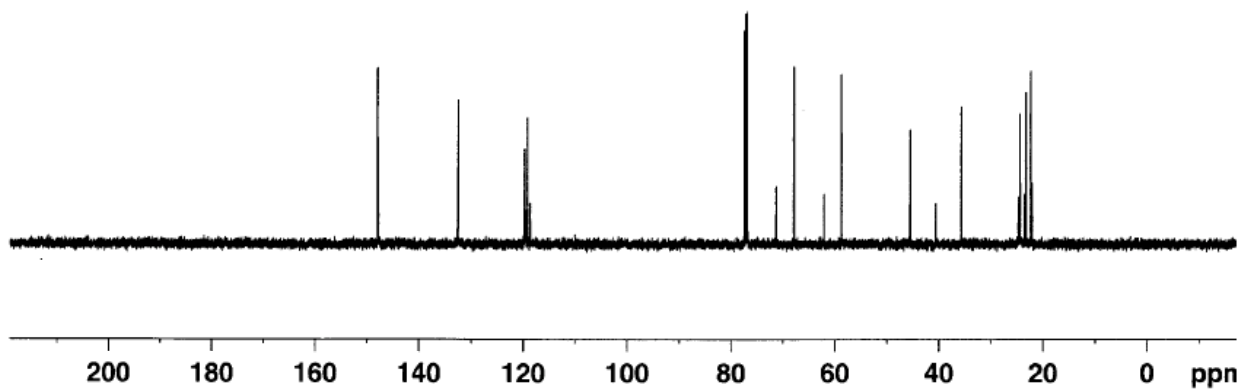

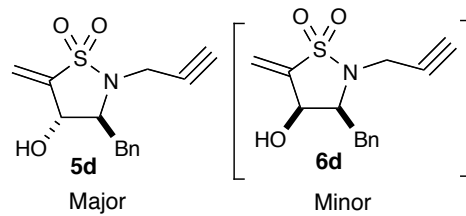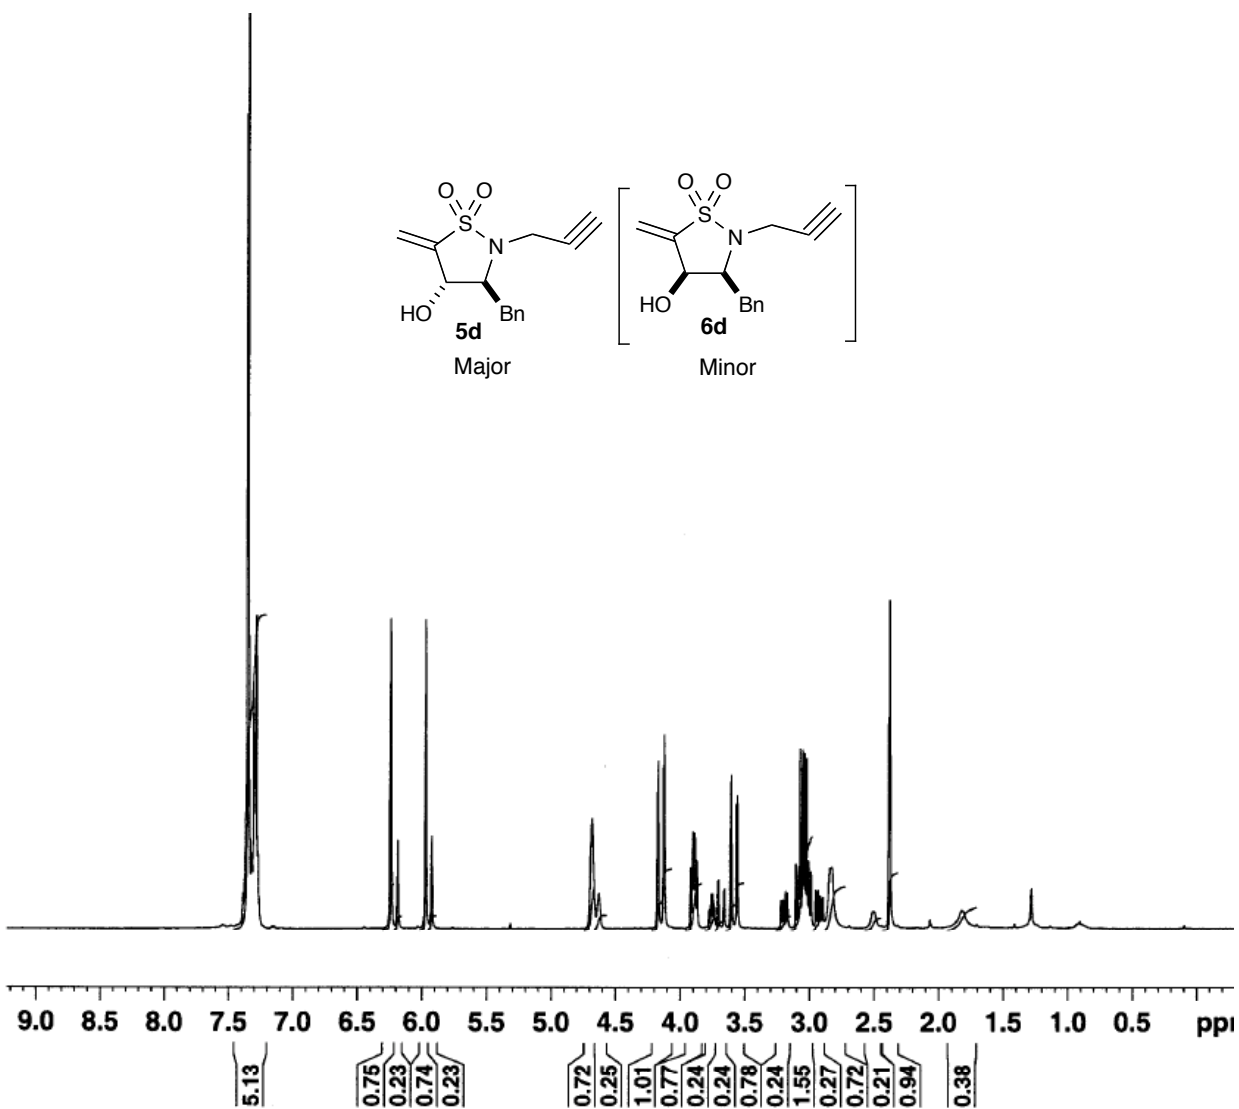

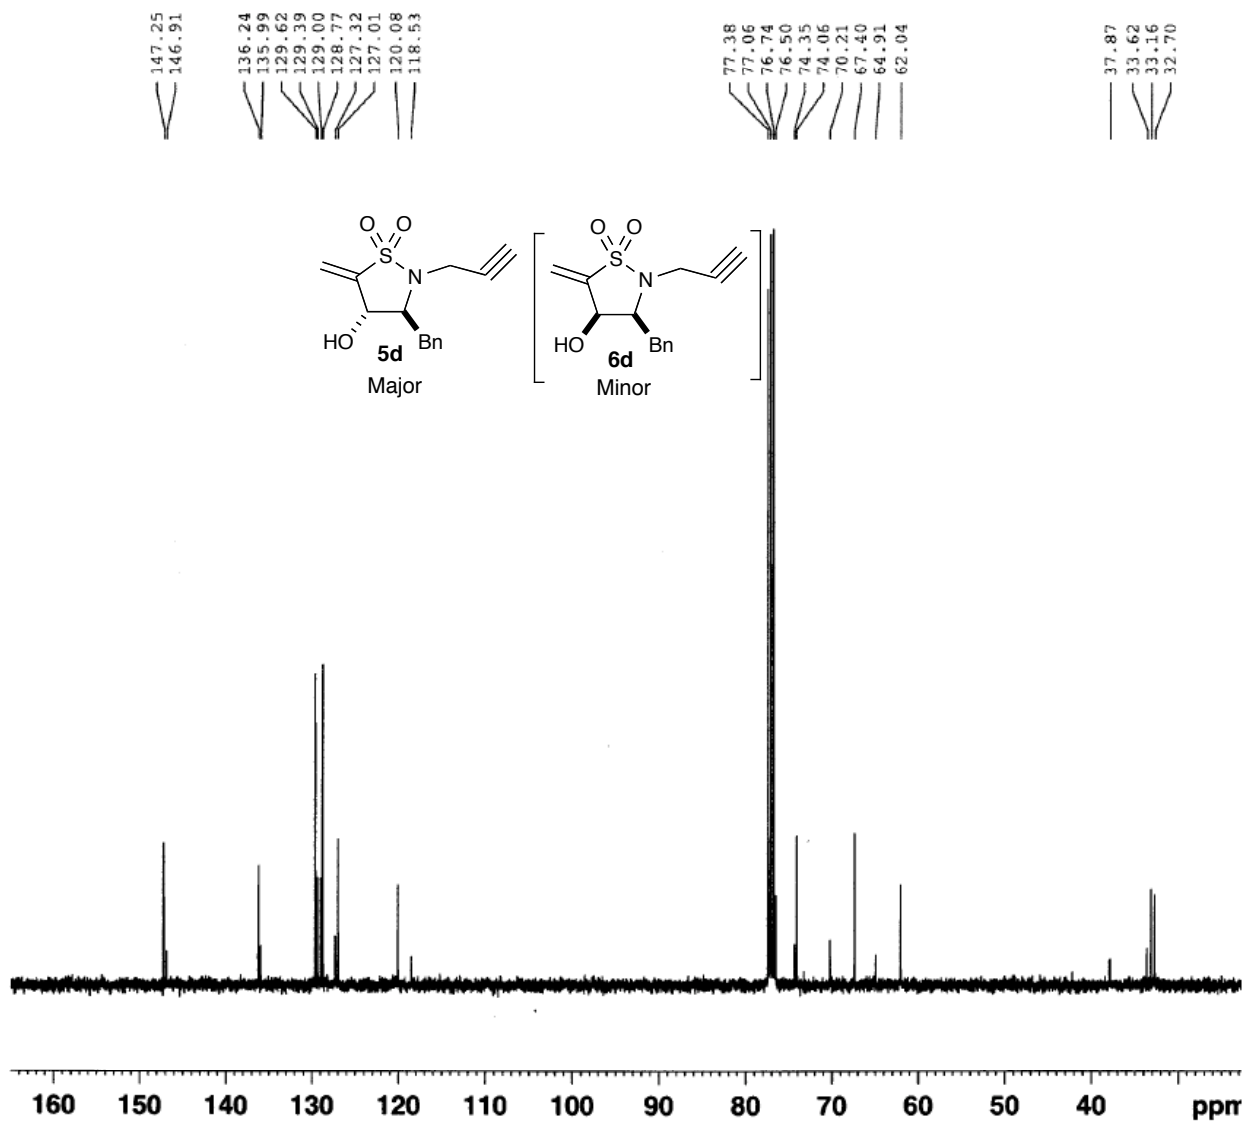

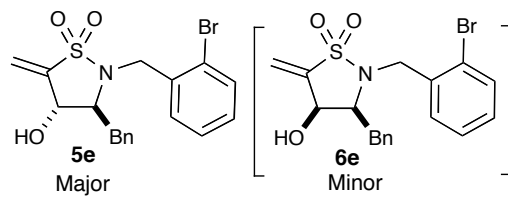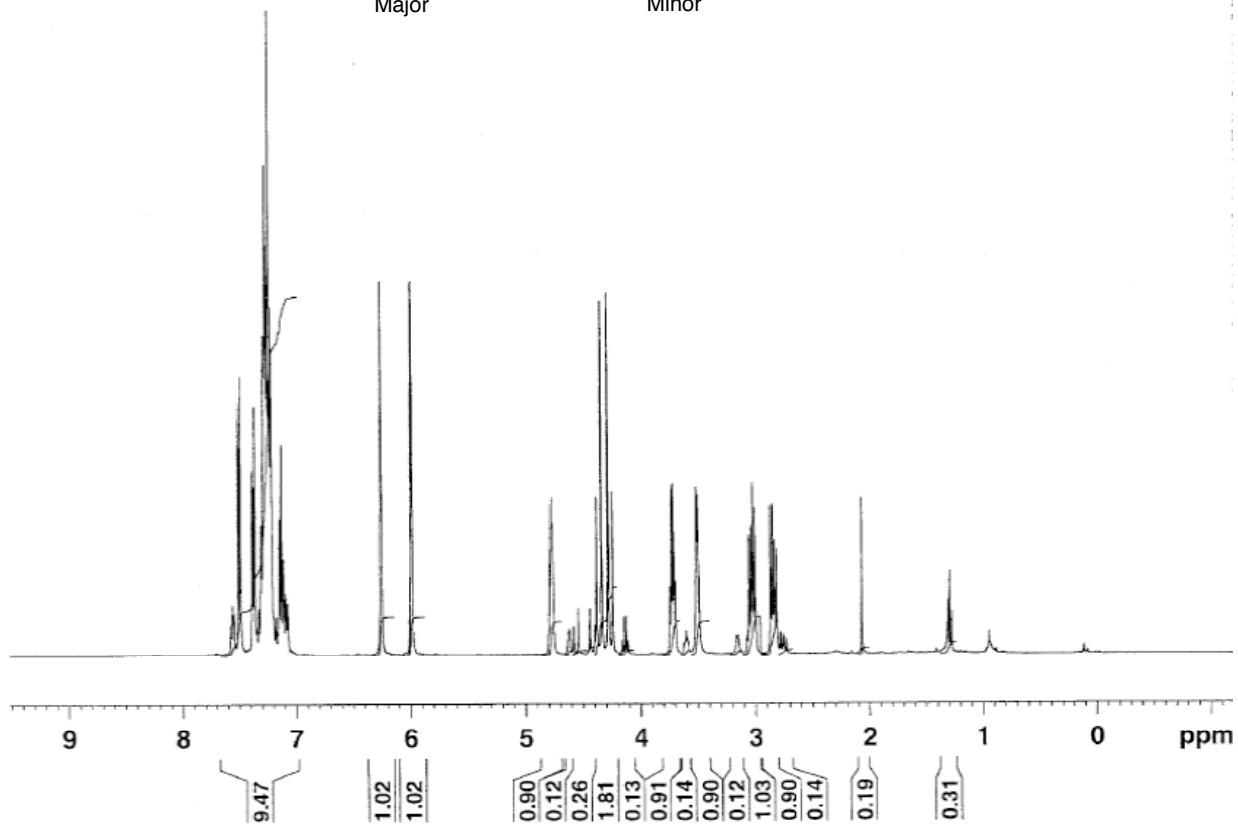

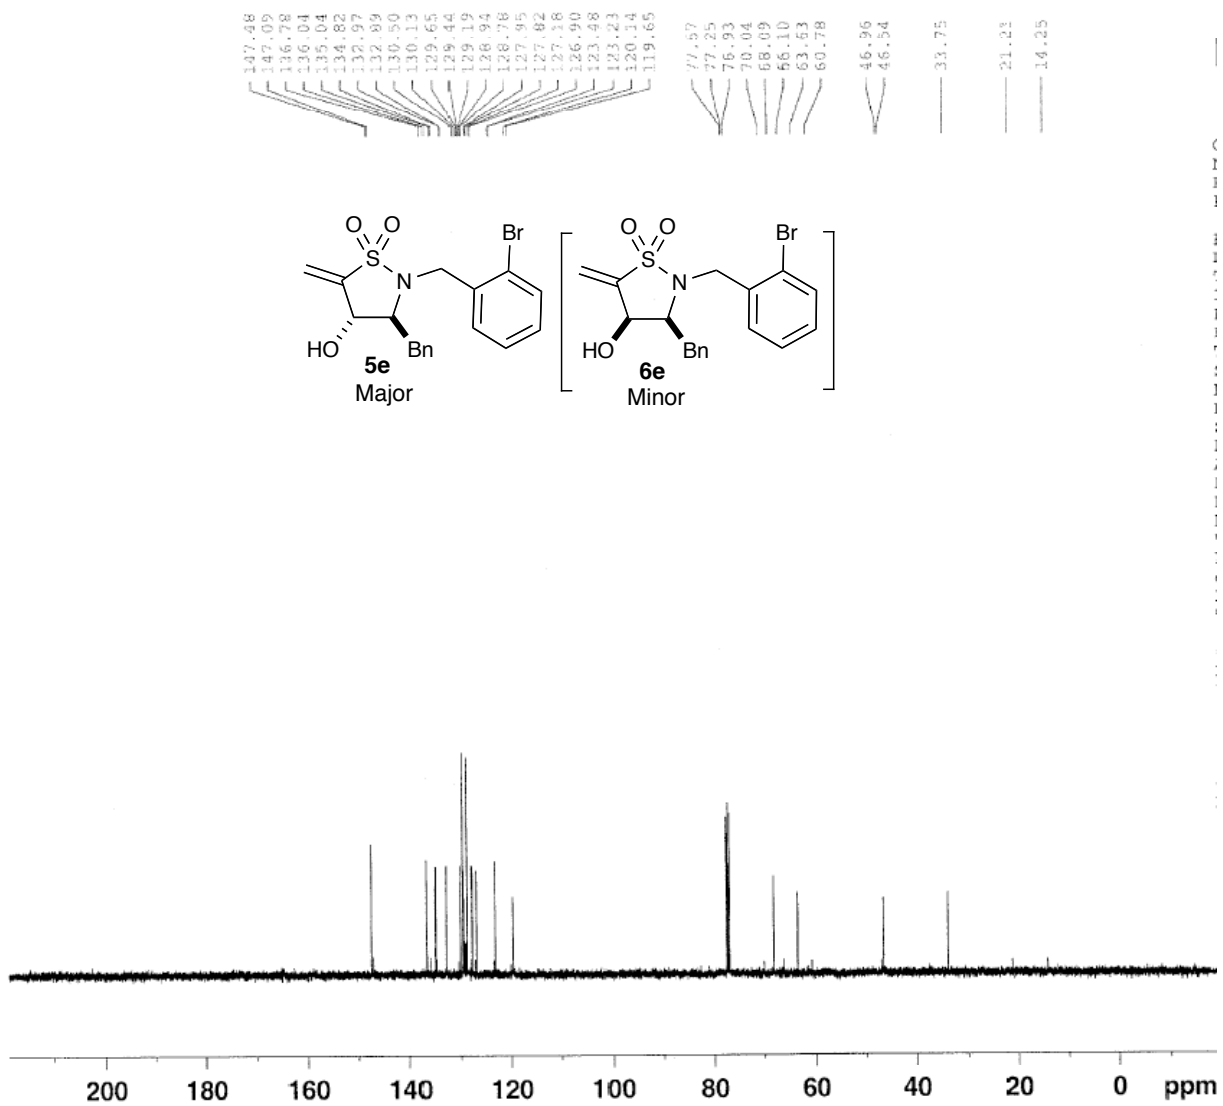

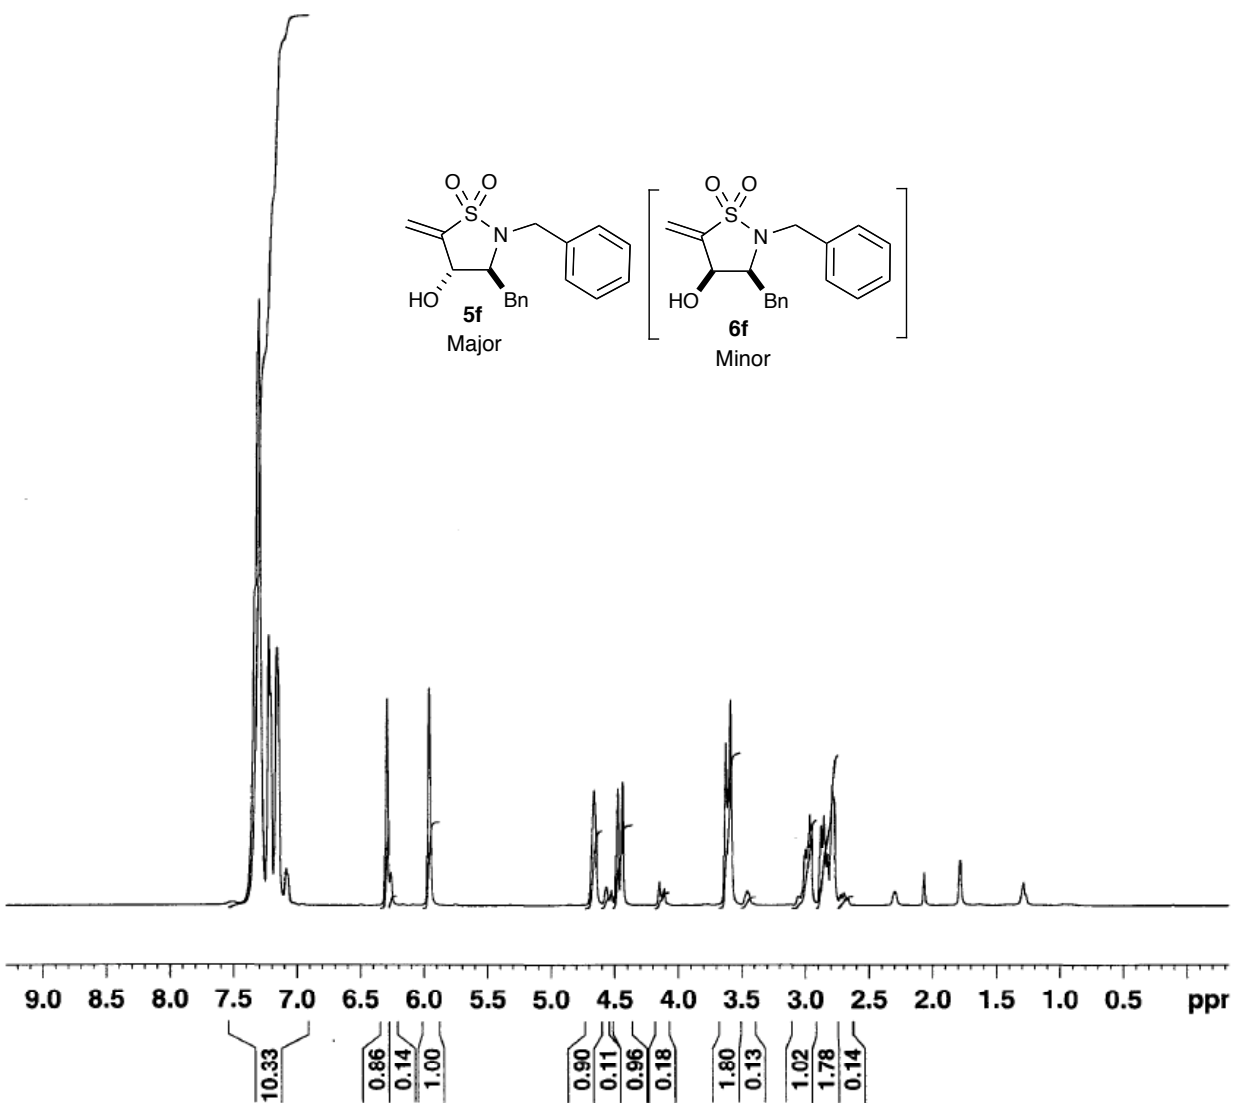

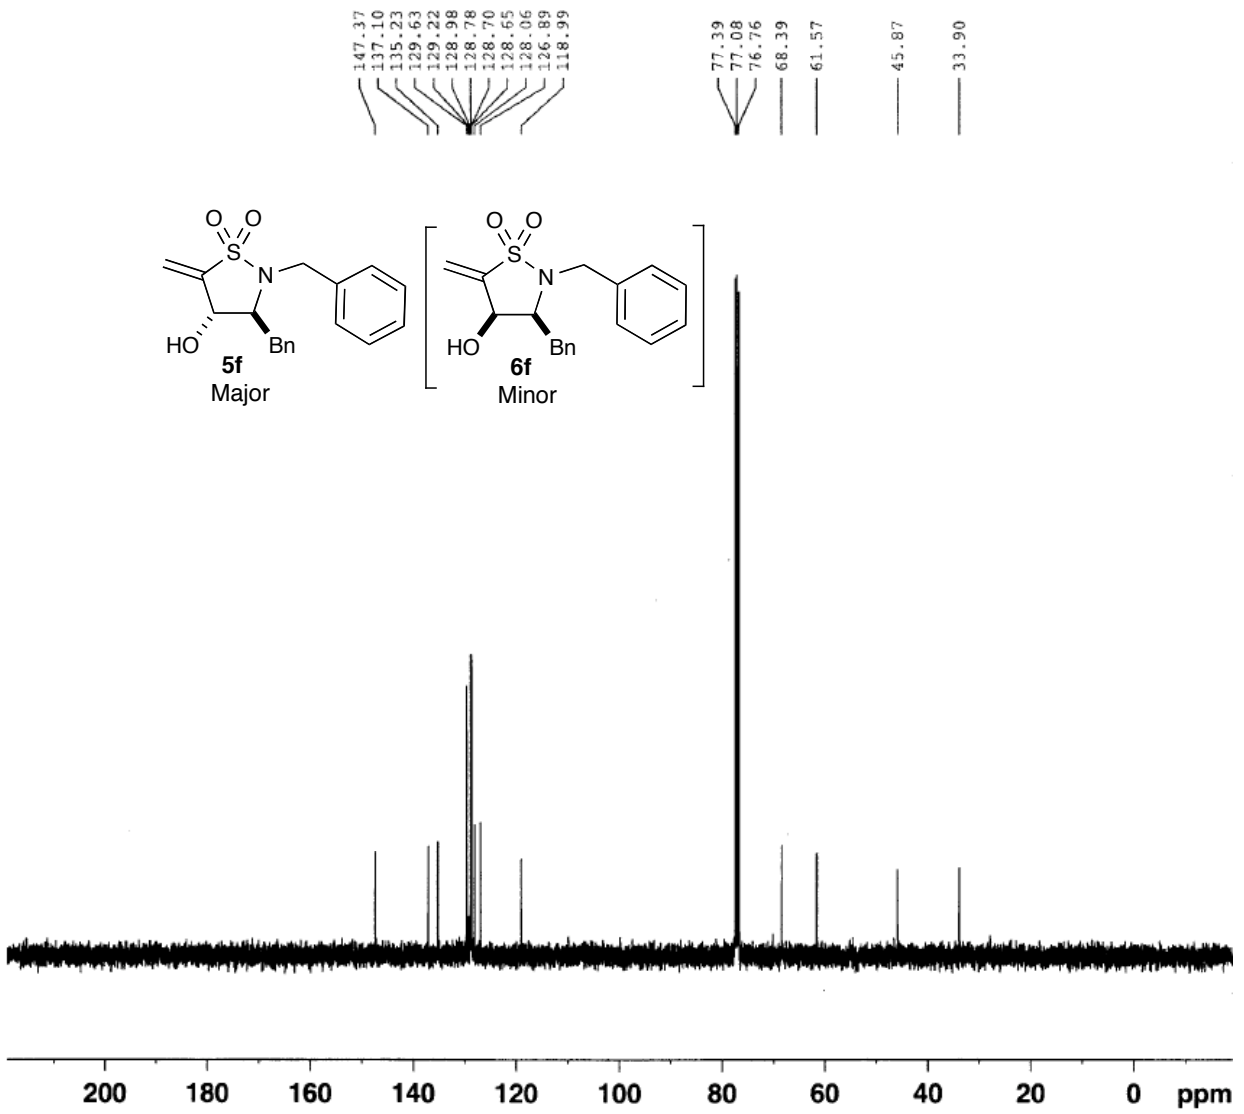



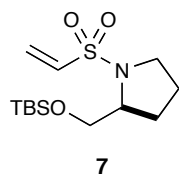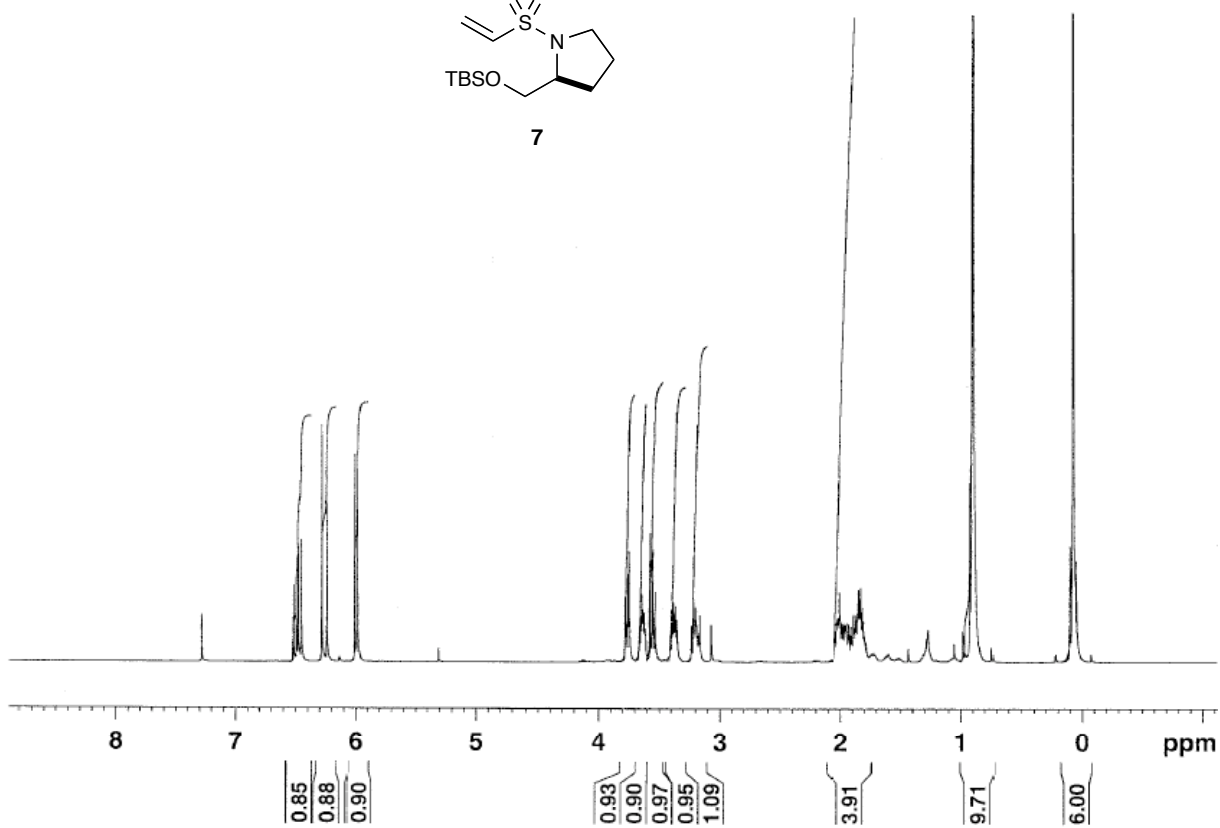

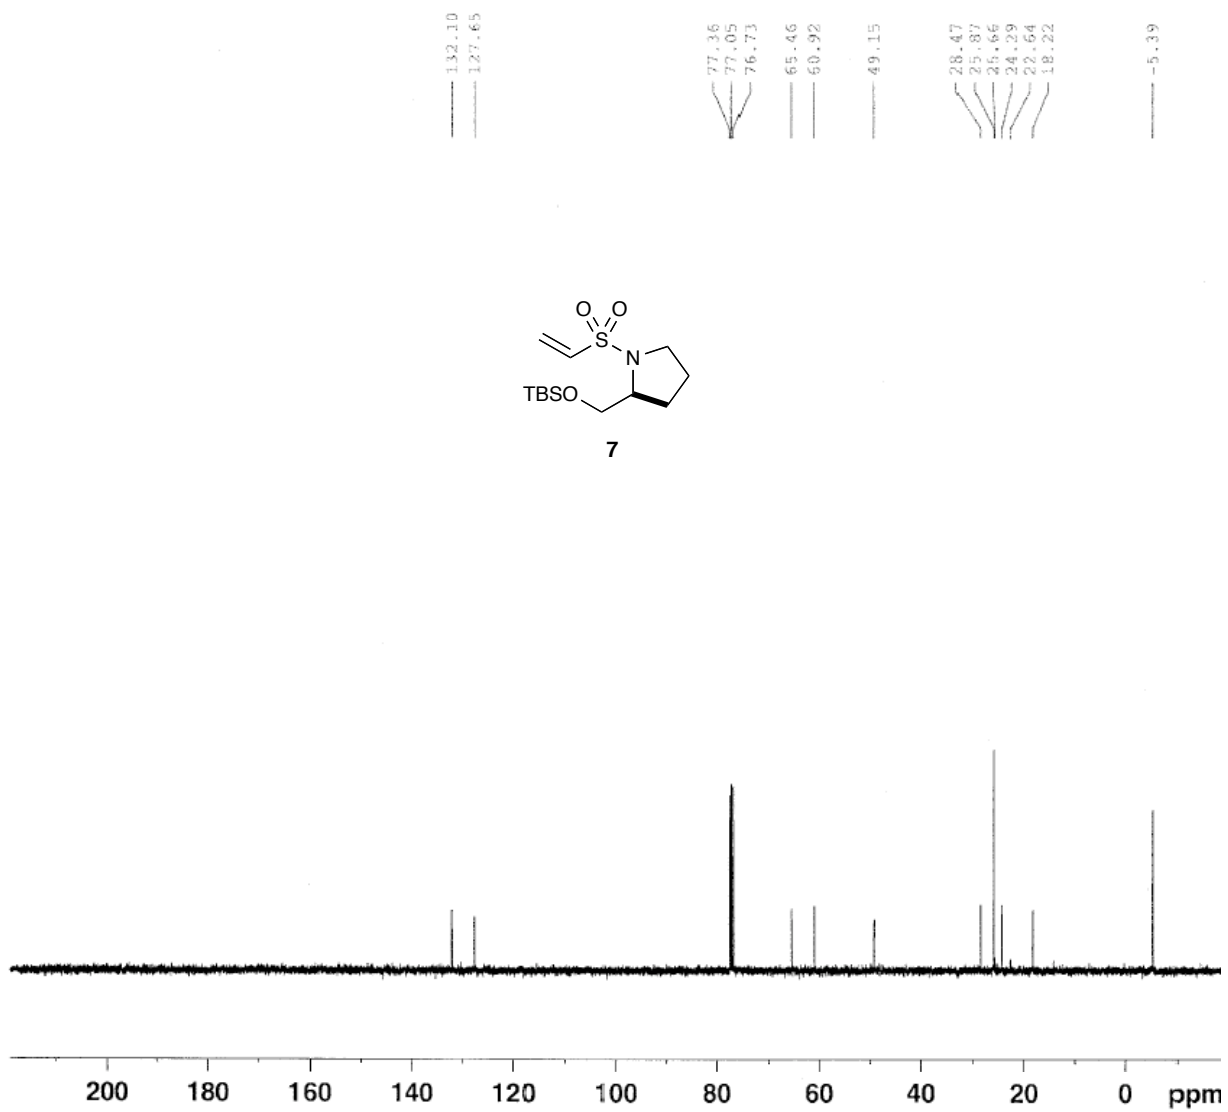

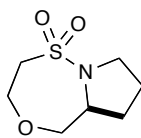

8

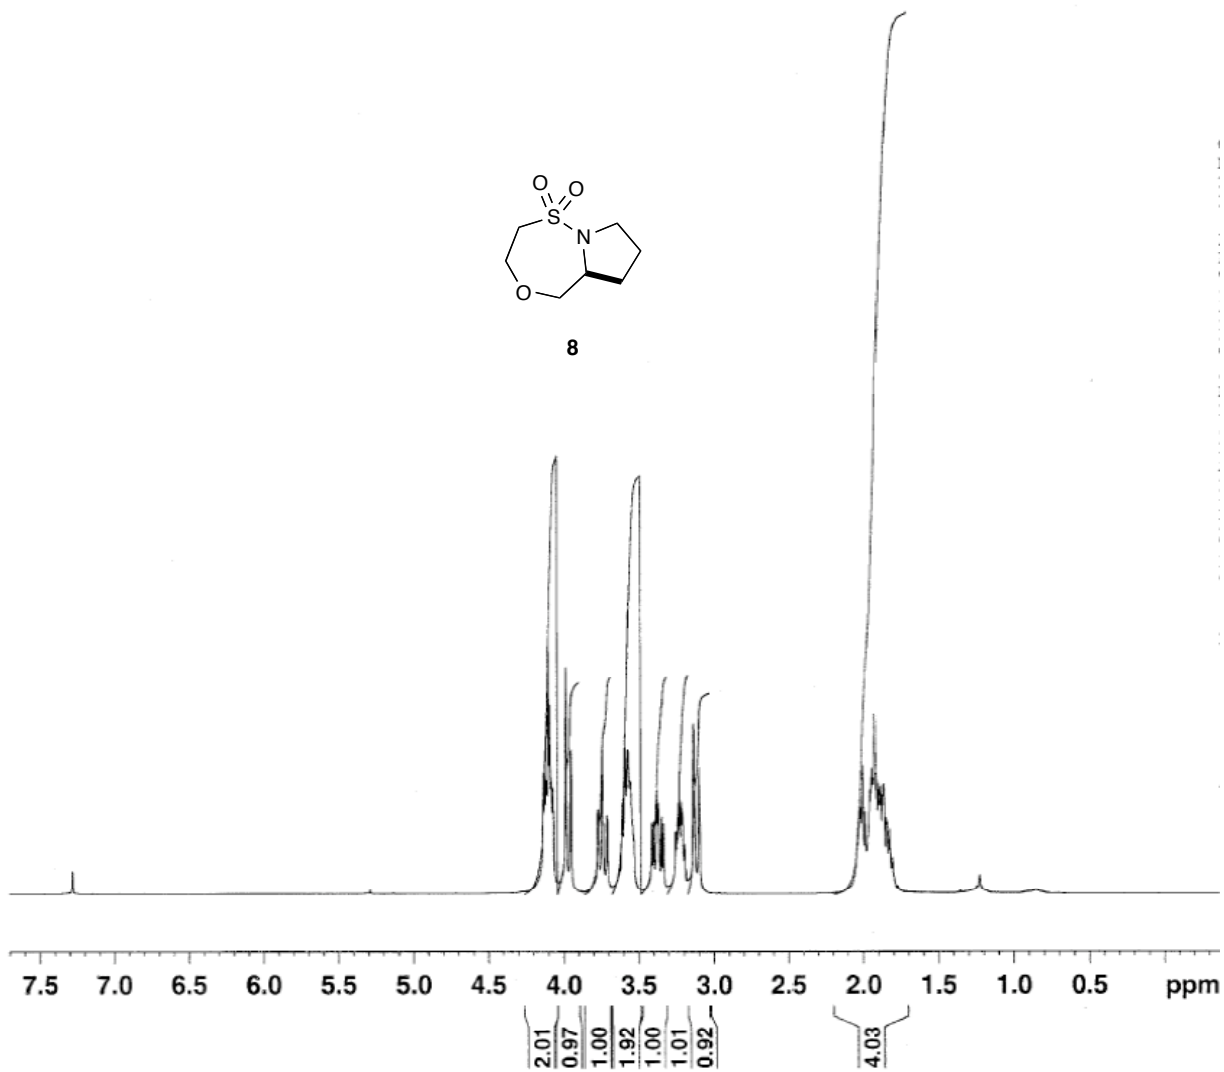

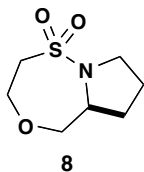

77.46  
77.14  
76.82  
74.42  
66.99  
58.05  
52.11  
50.60  
31.29  
24.22

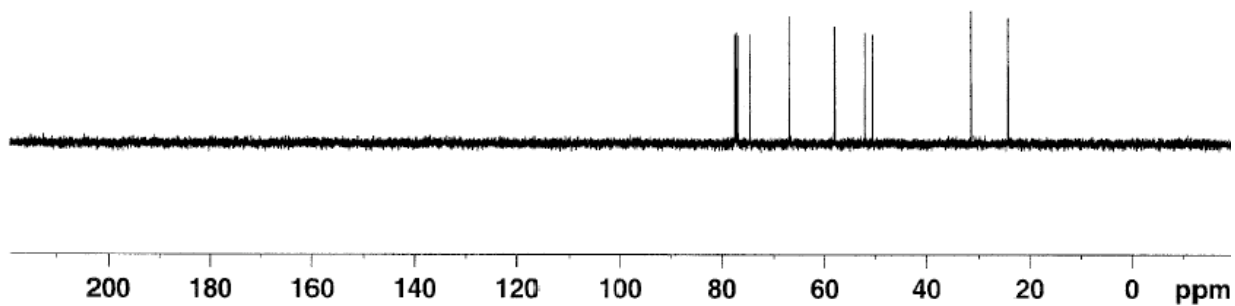

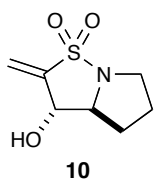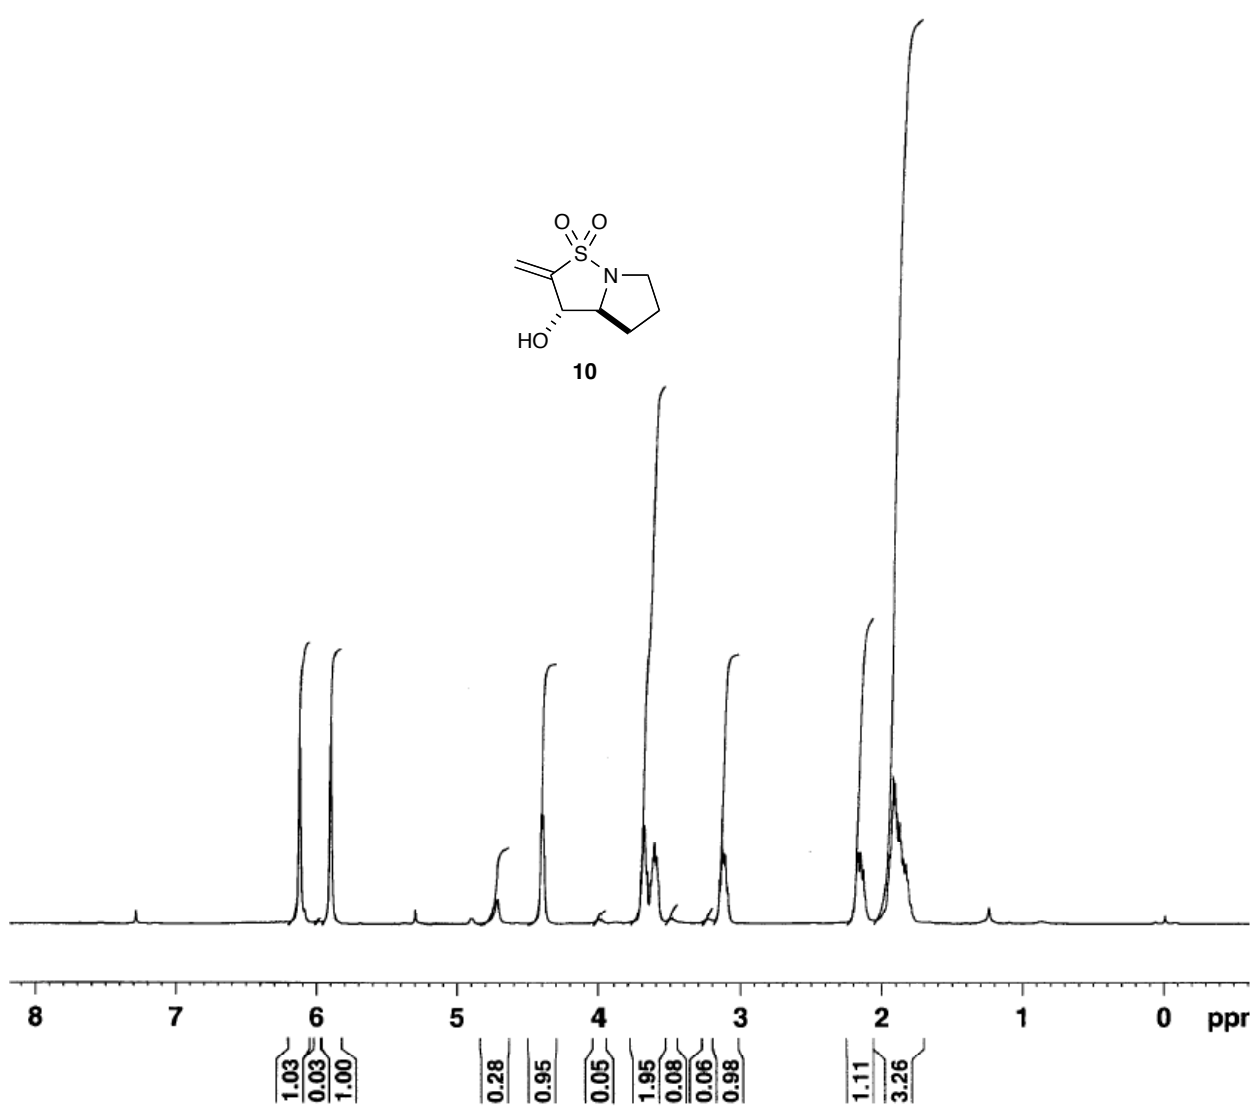

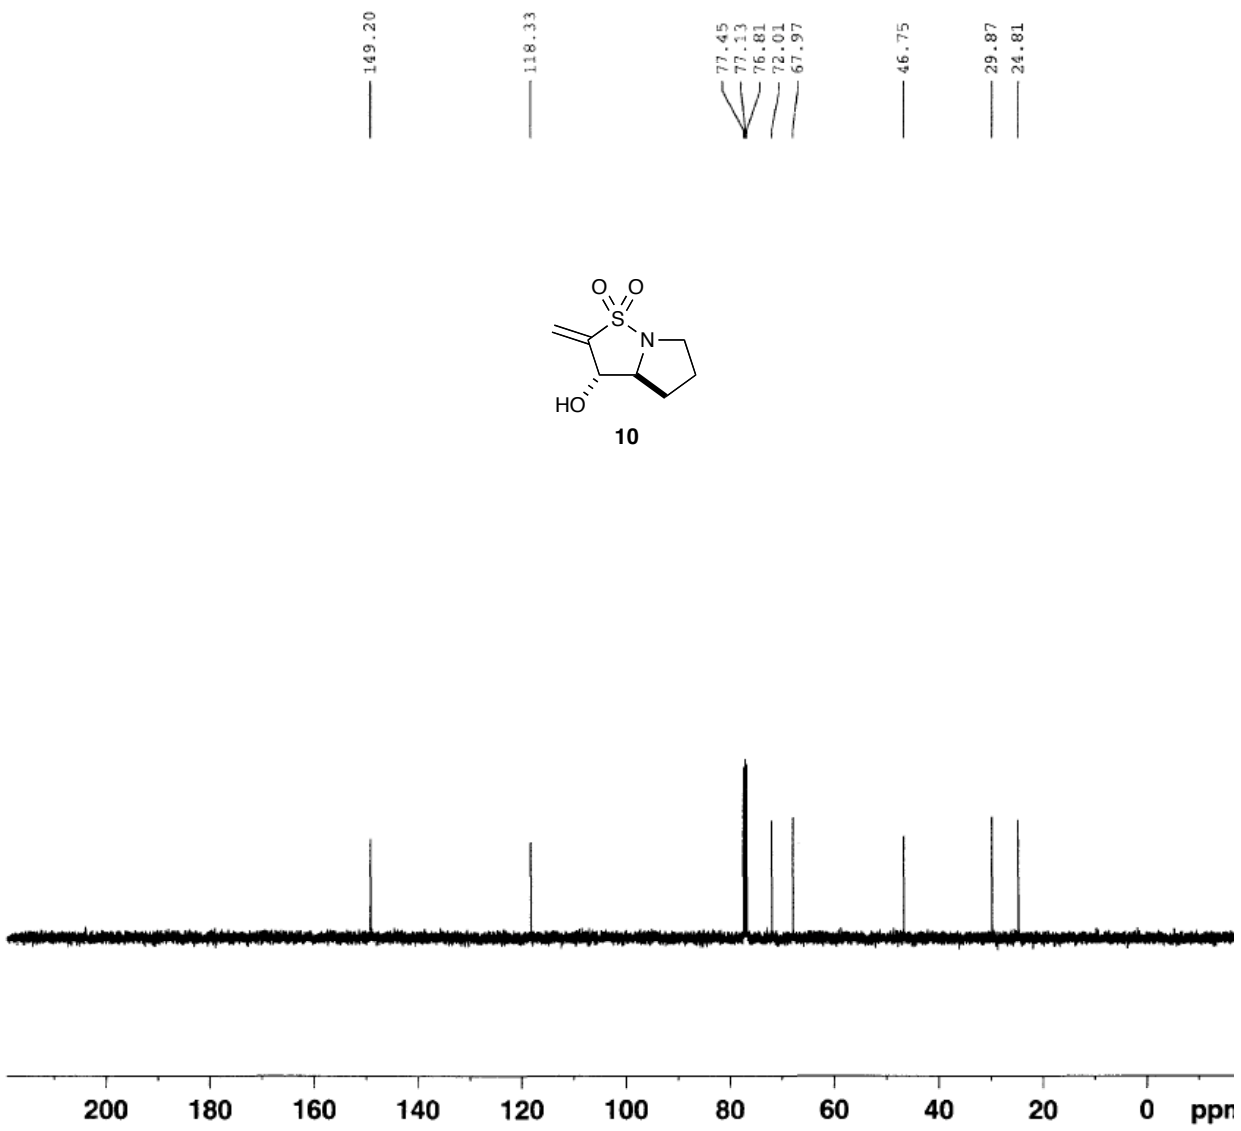

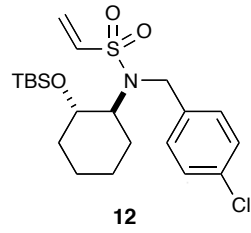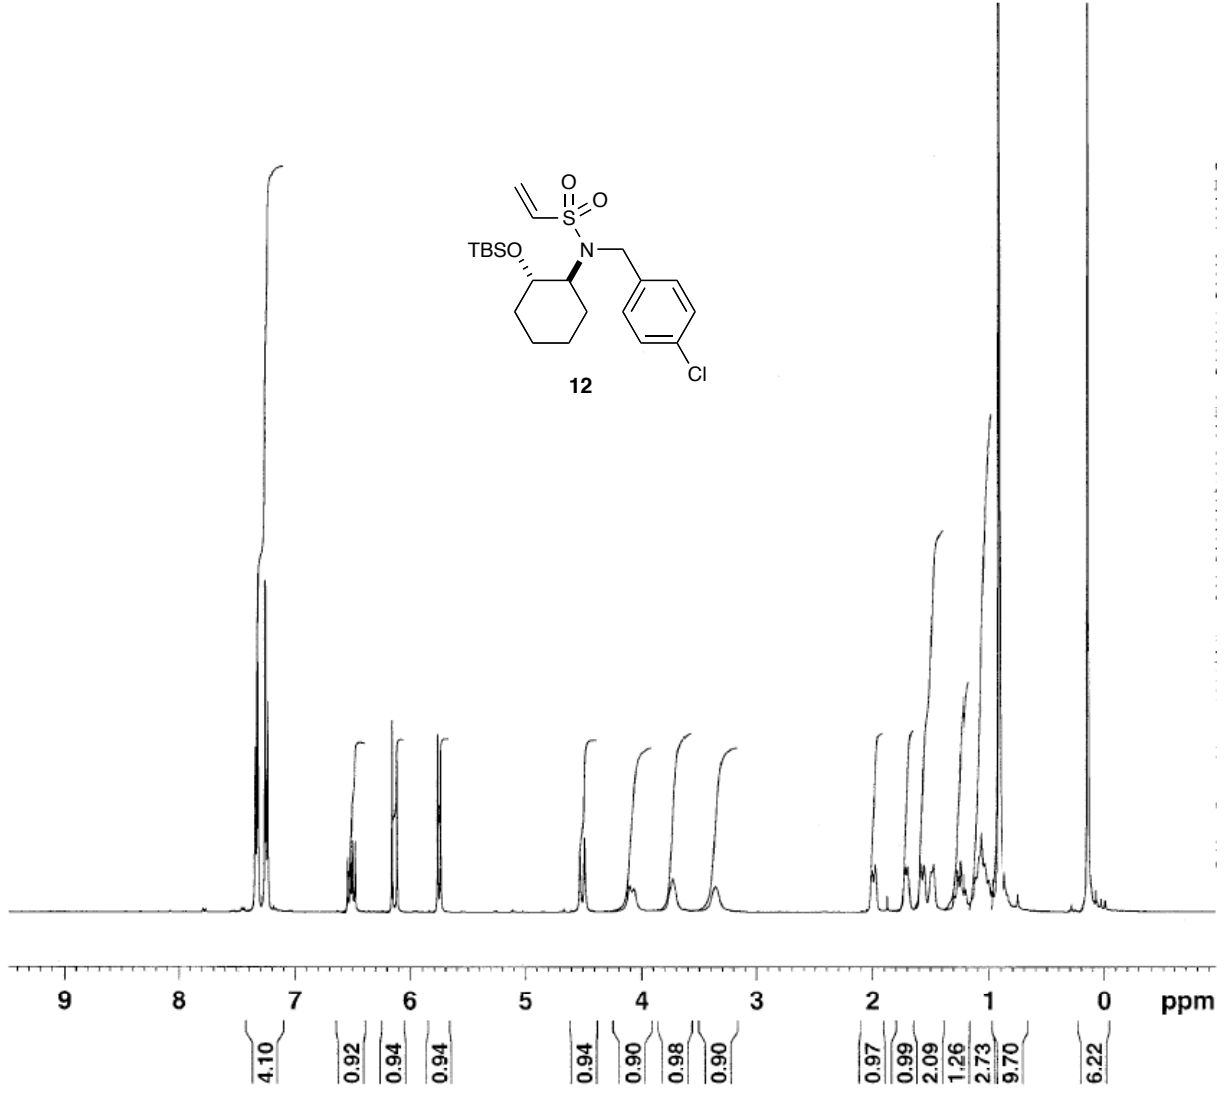

137.29  
136.72  
133.19  
129.52  
128.54  
124.58

77.58  
77.26  
76.94  
71.66  
64.57

36.48  
33.21  
26.01  
25.47  
24.21  
18.04

-3.56  
-3.84

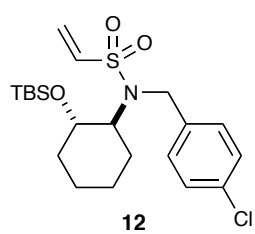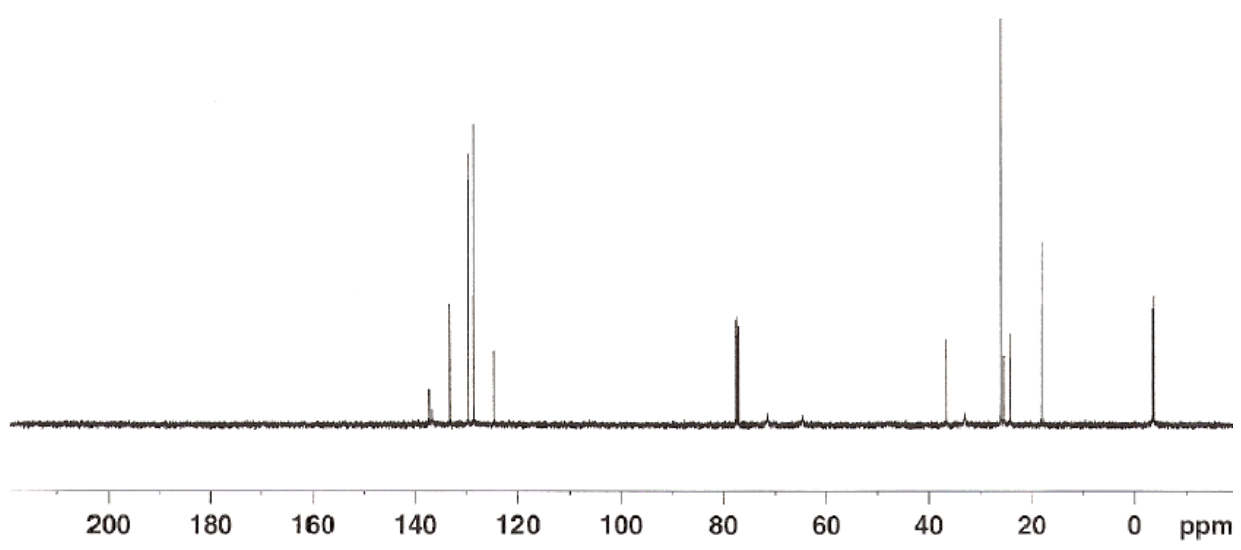



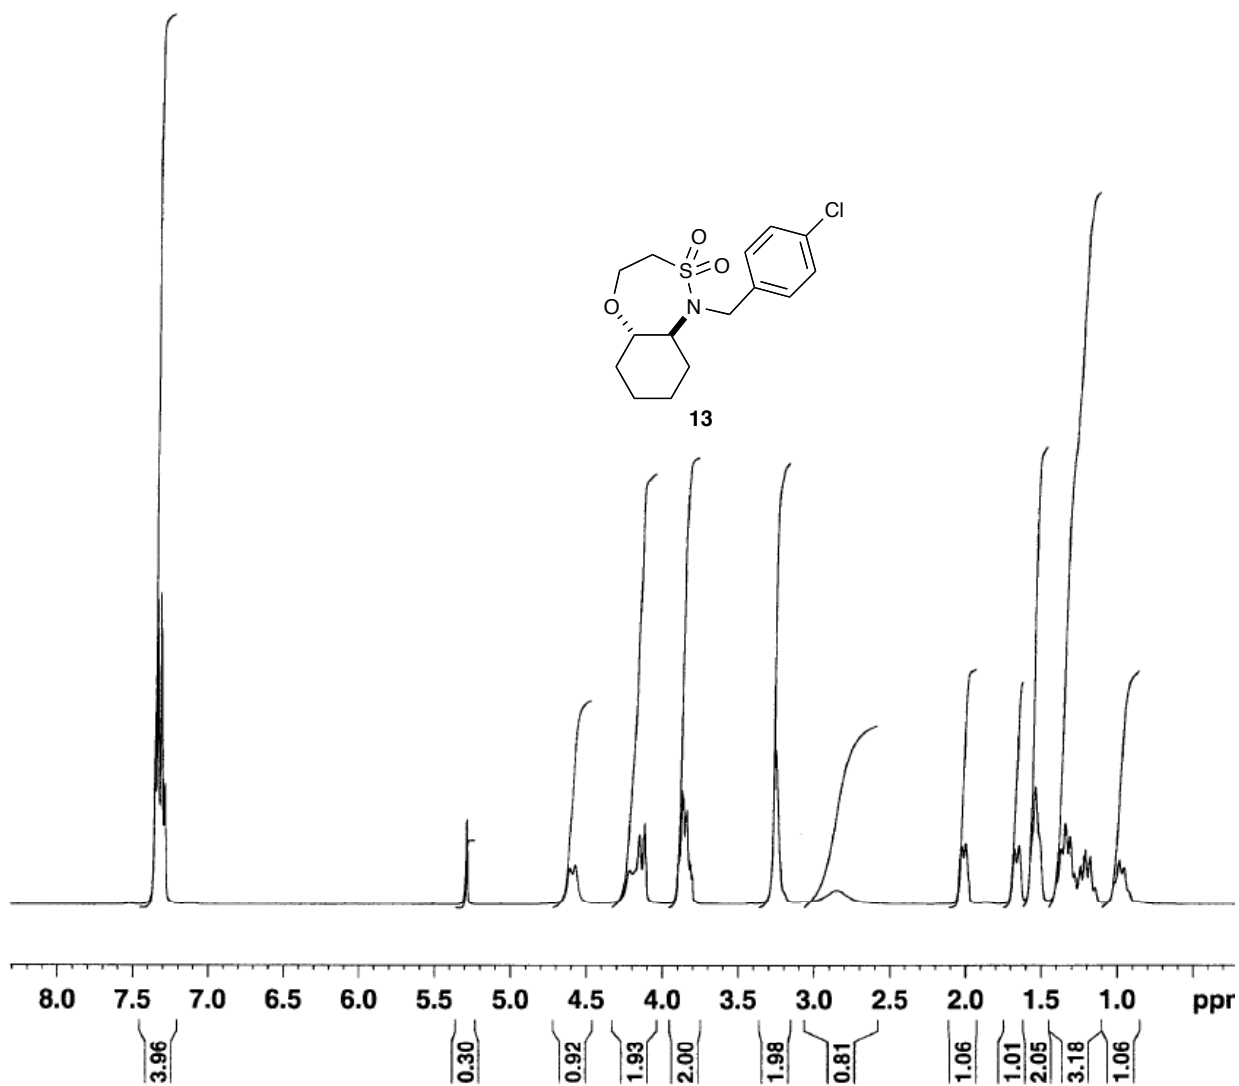

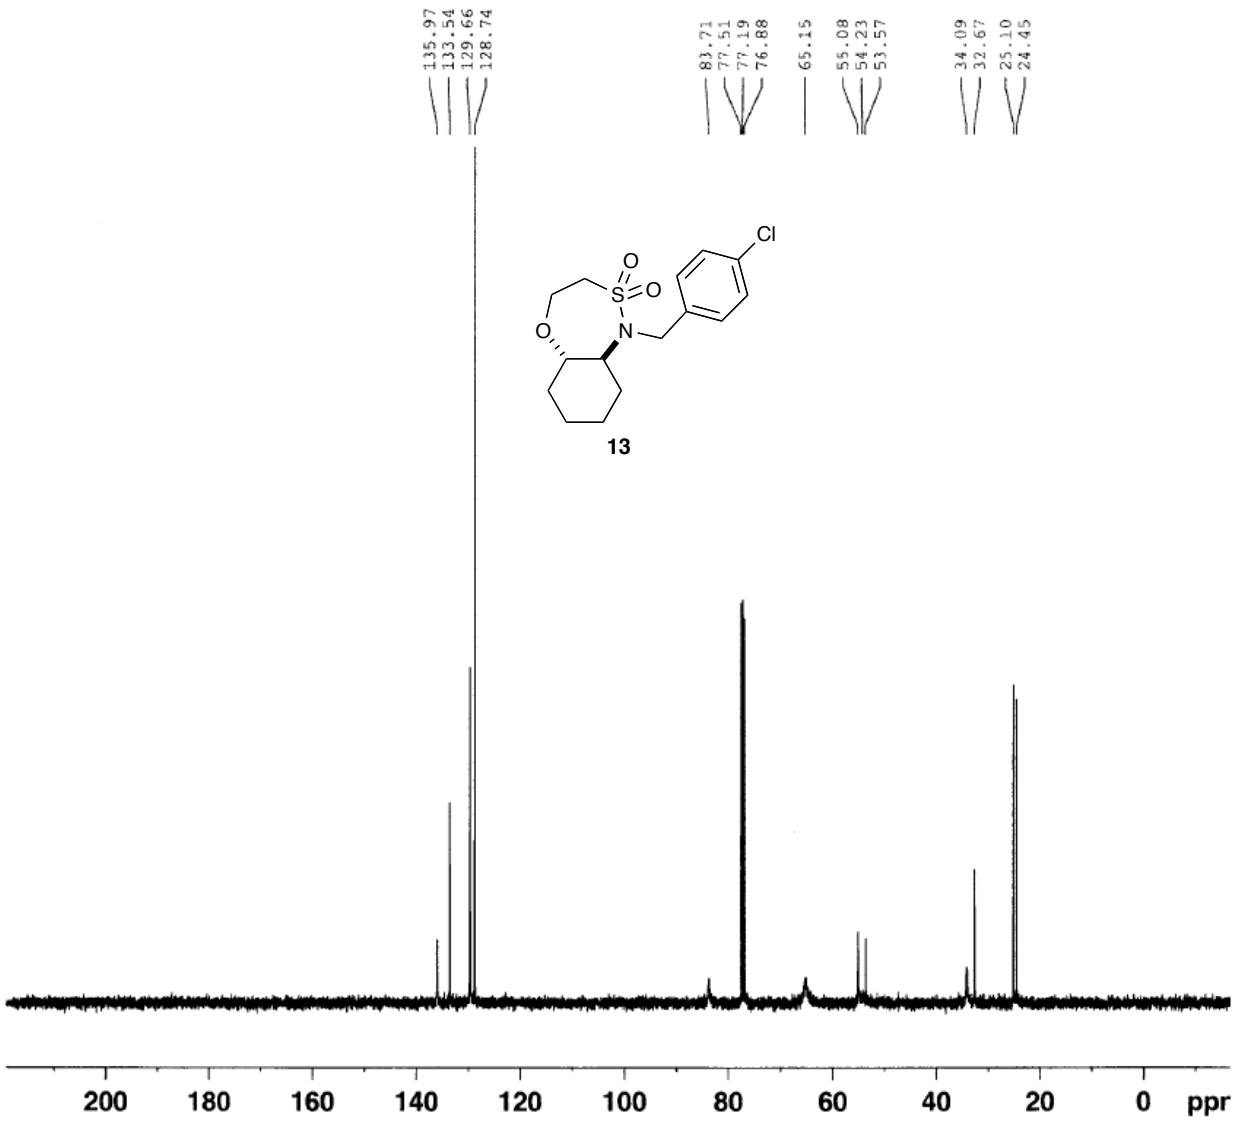

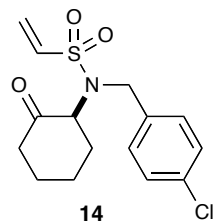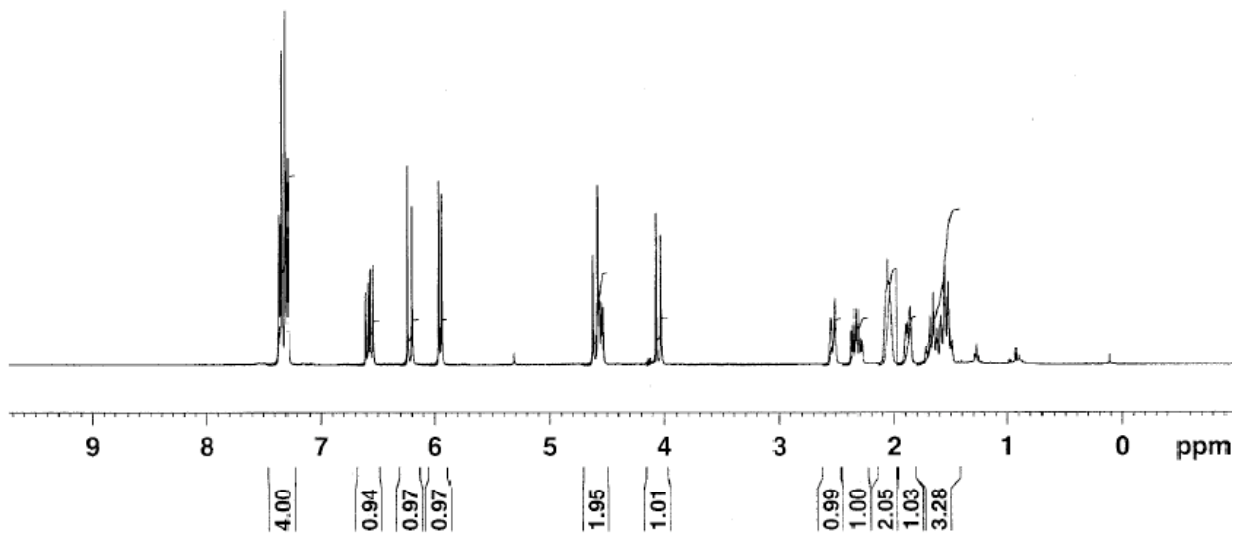

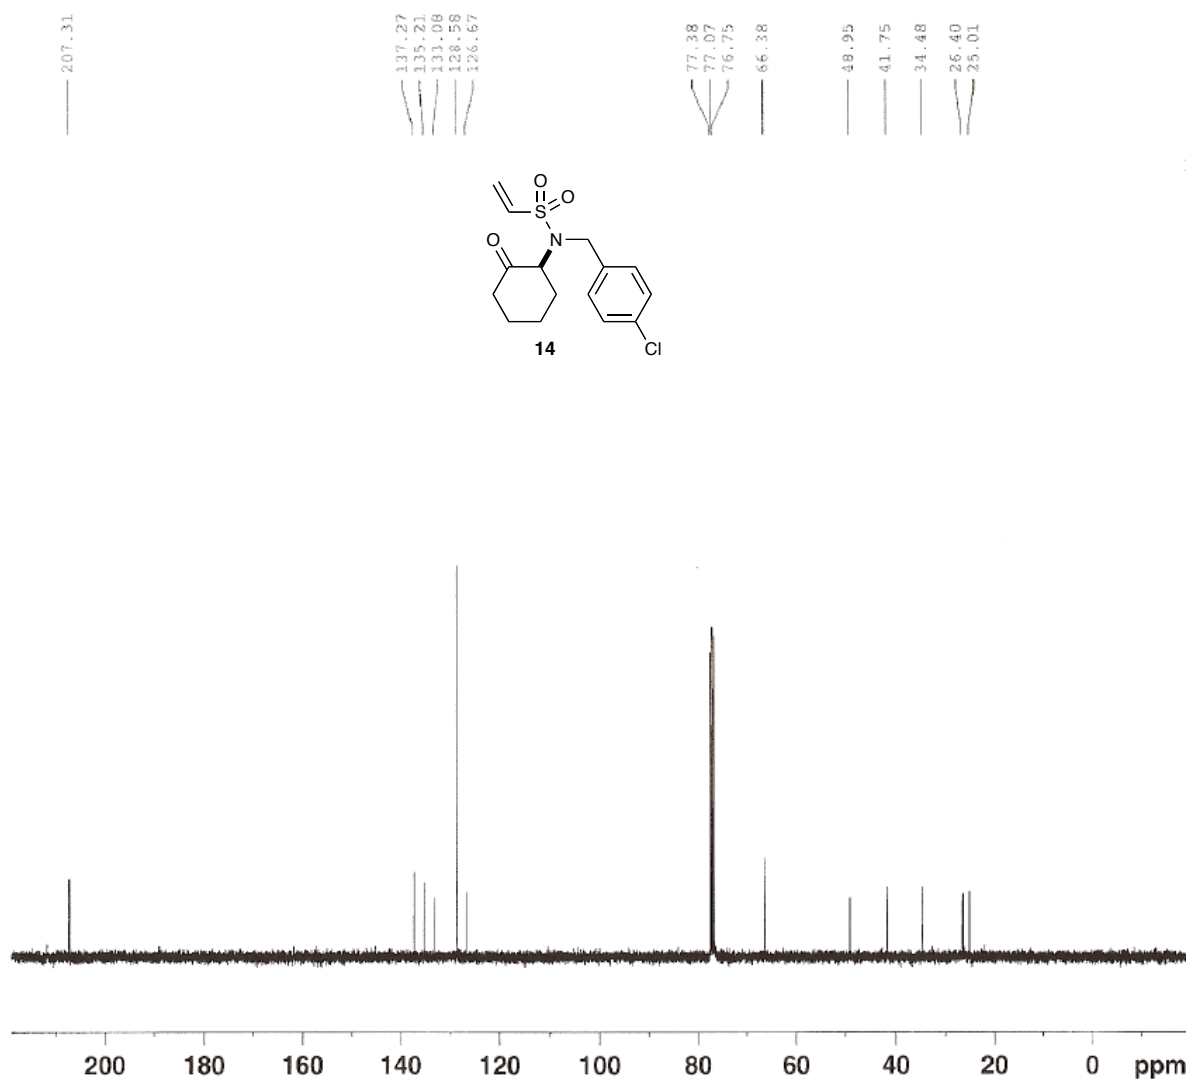

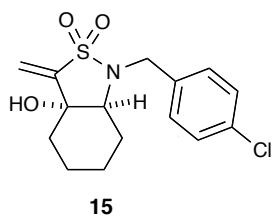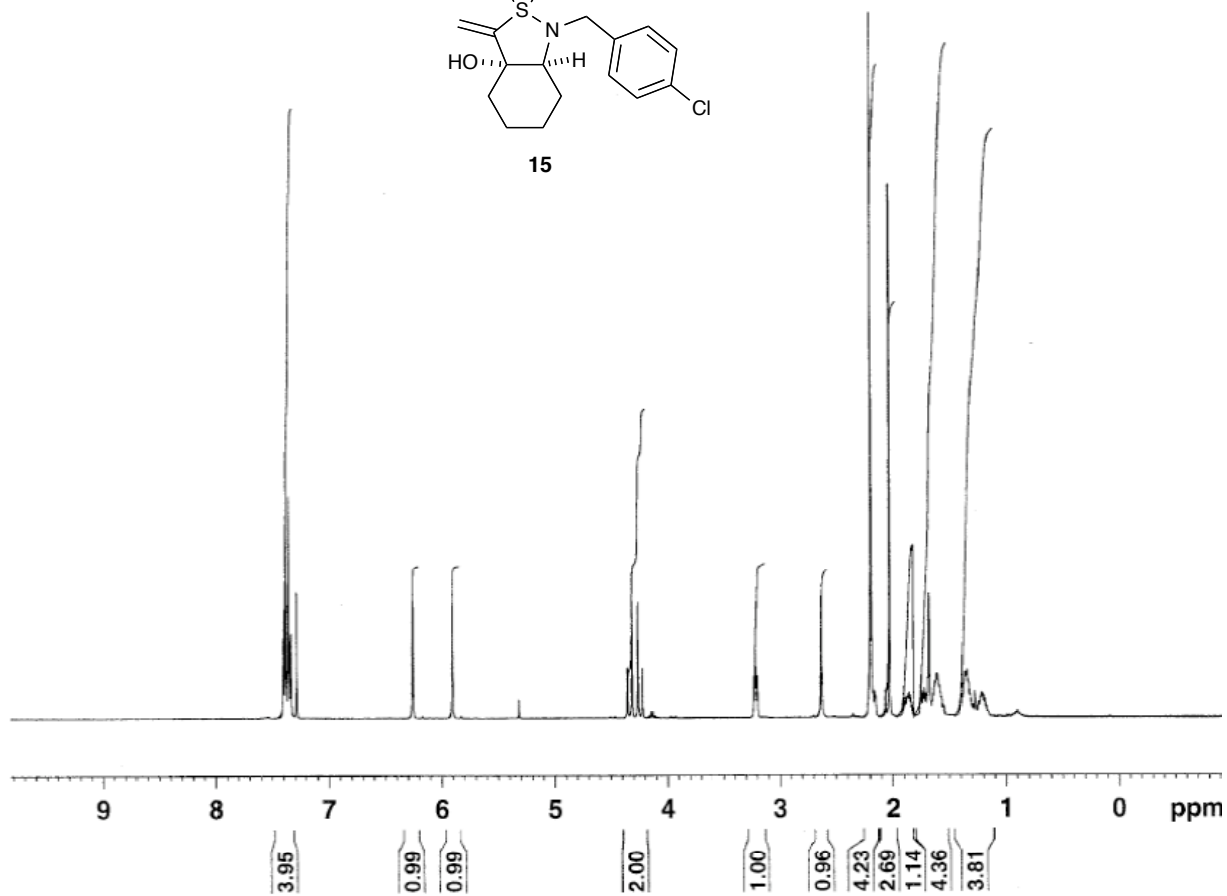

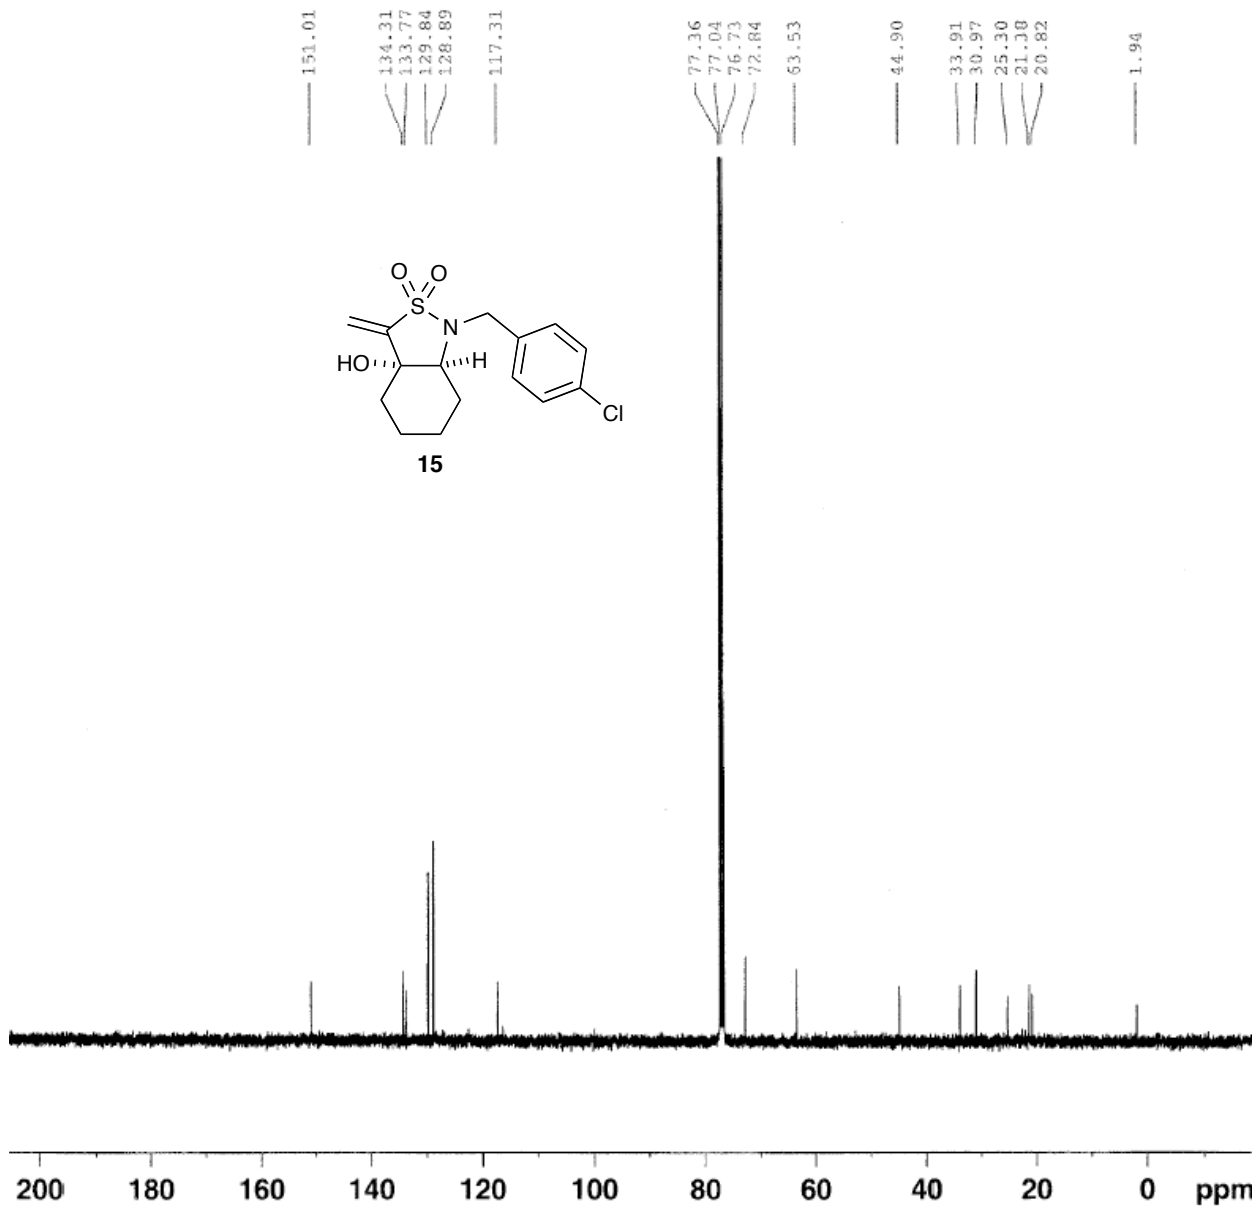

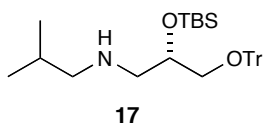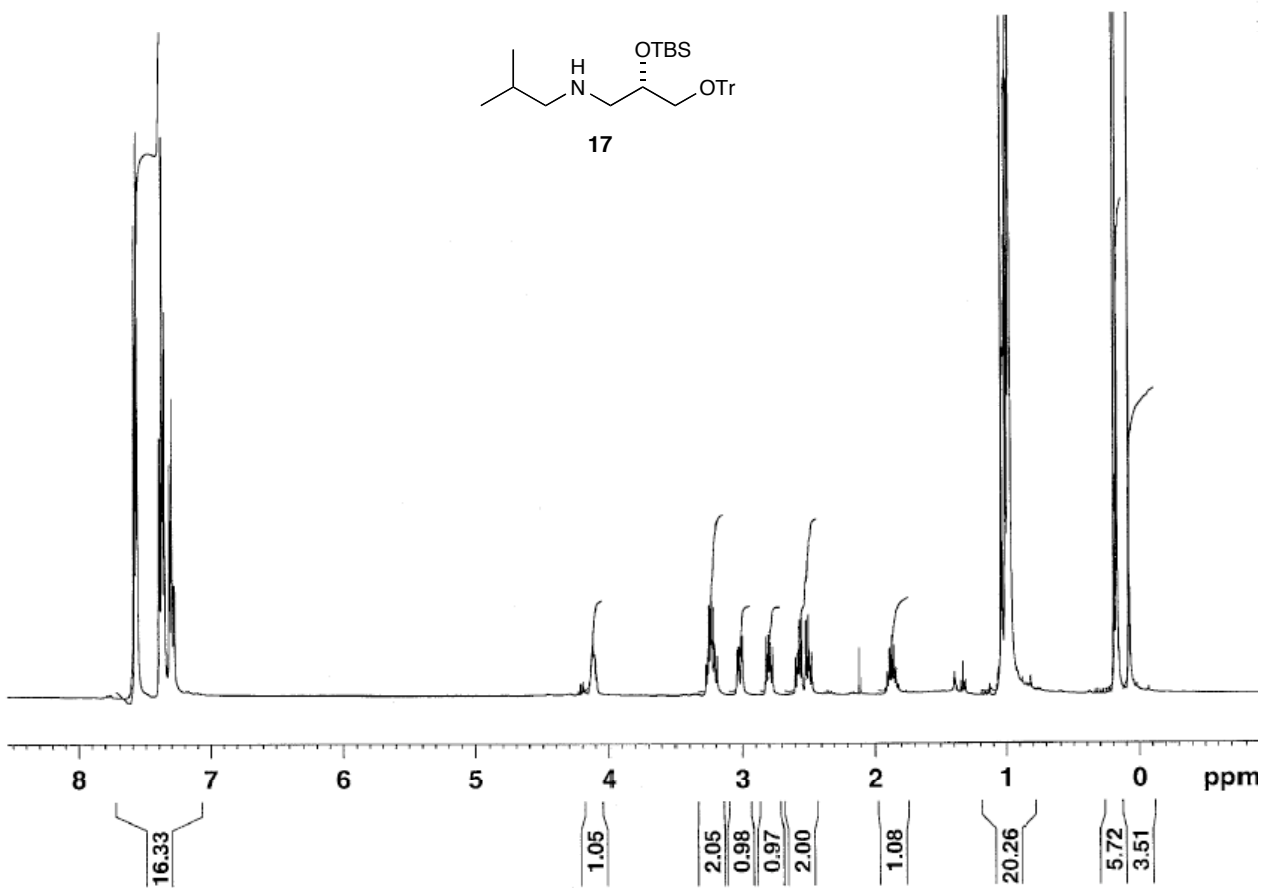

144.11  
 128.81  
 127.81  
 127.06  
 86.67  
 77.55  
 77.23  
 76.91  
 71.20  
 66.57  
 58.23  
 54.15  
 28.37  
 25.96  
 20.79  
 18.19  
 18.14  
 14.30  
 -3.18  
 -4.30  
 -4.65

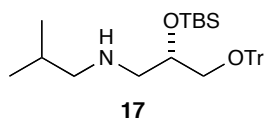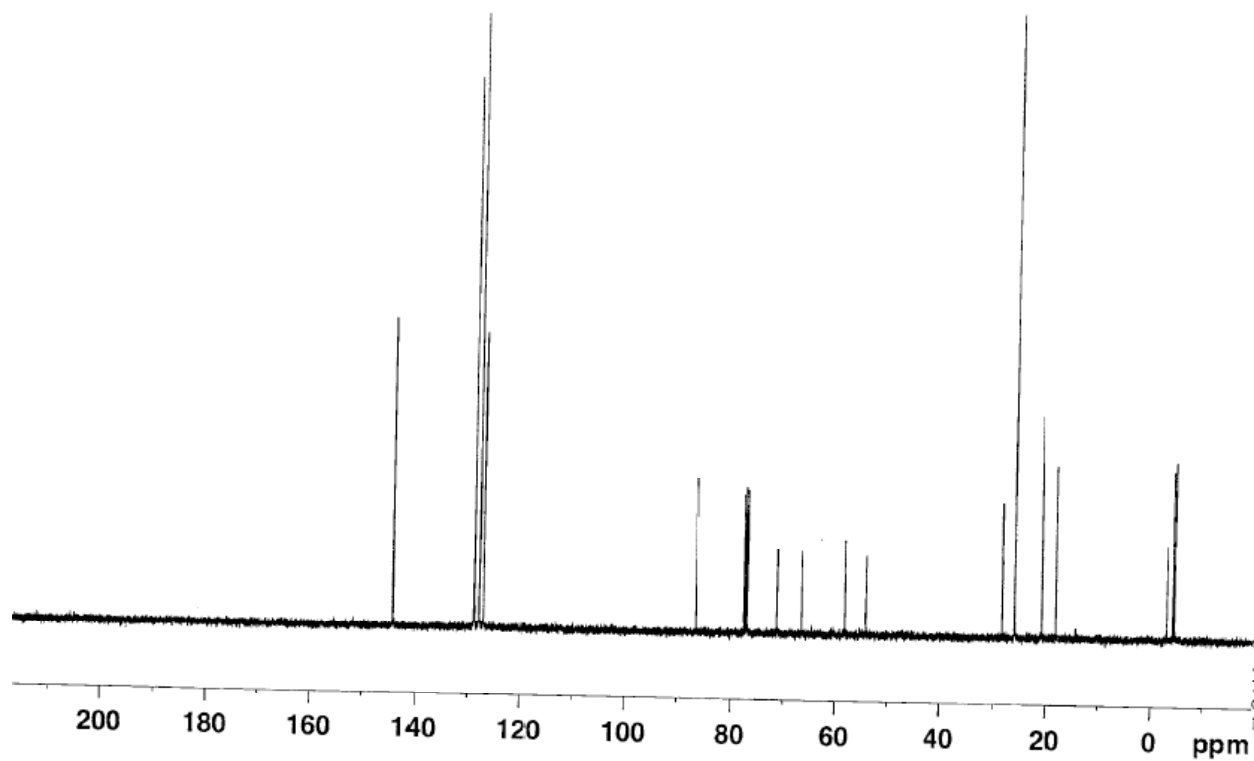



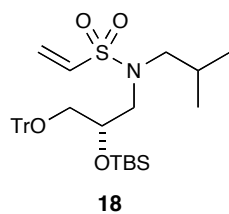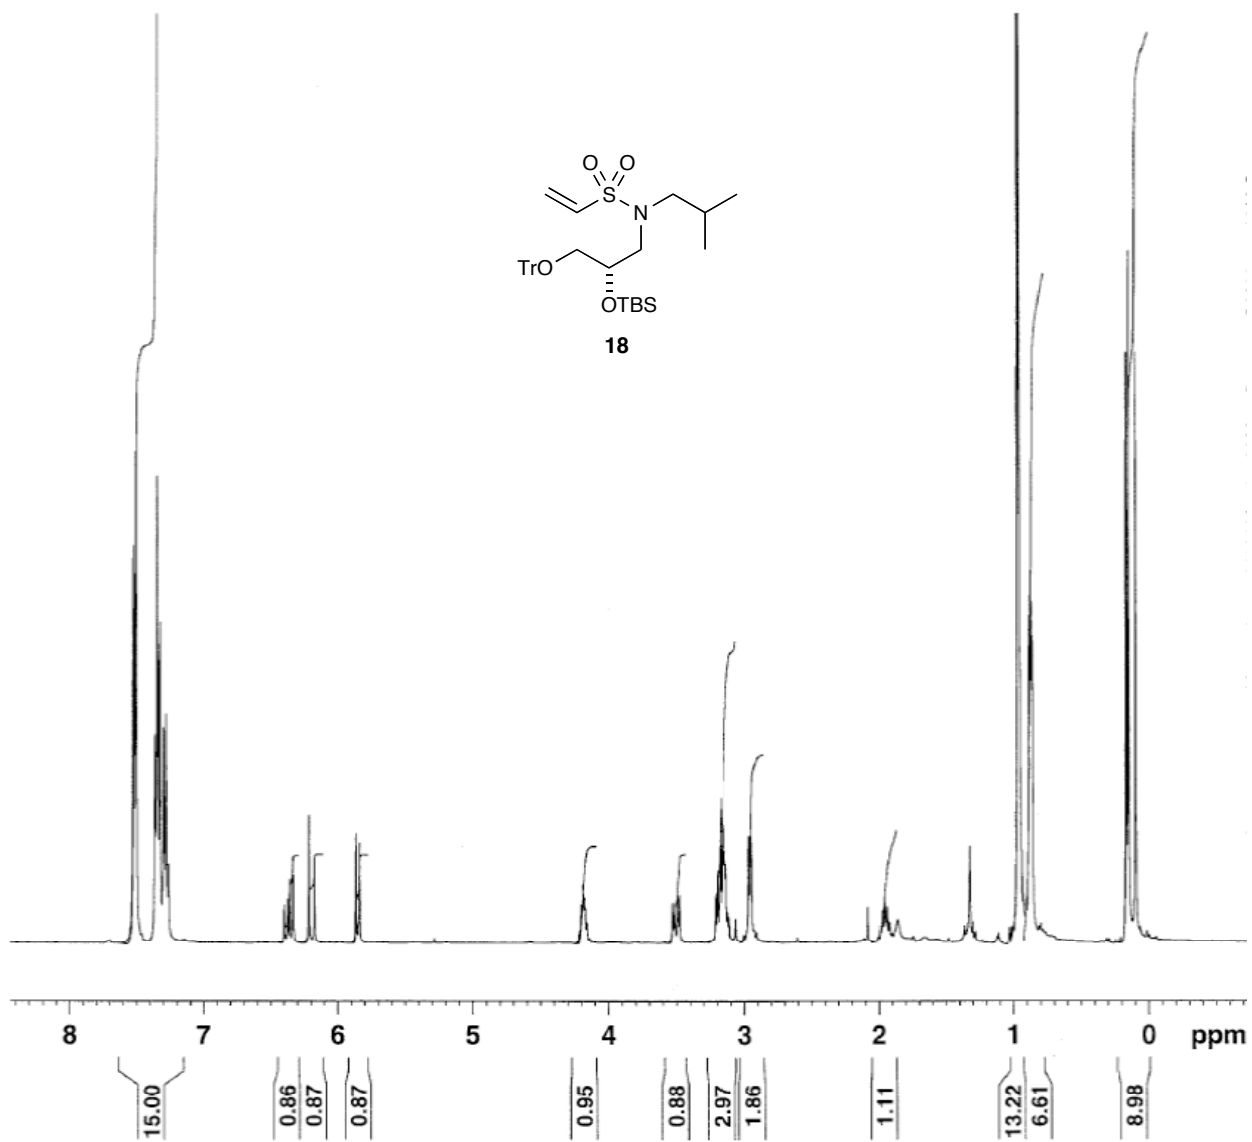



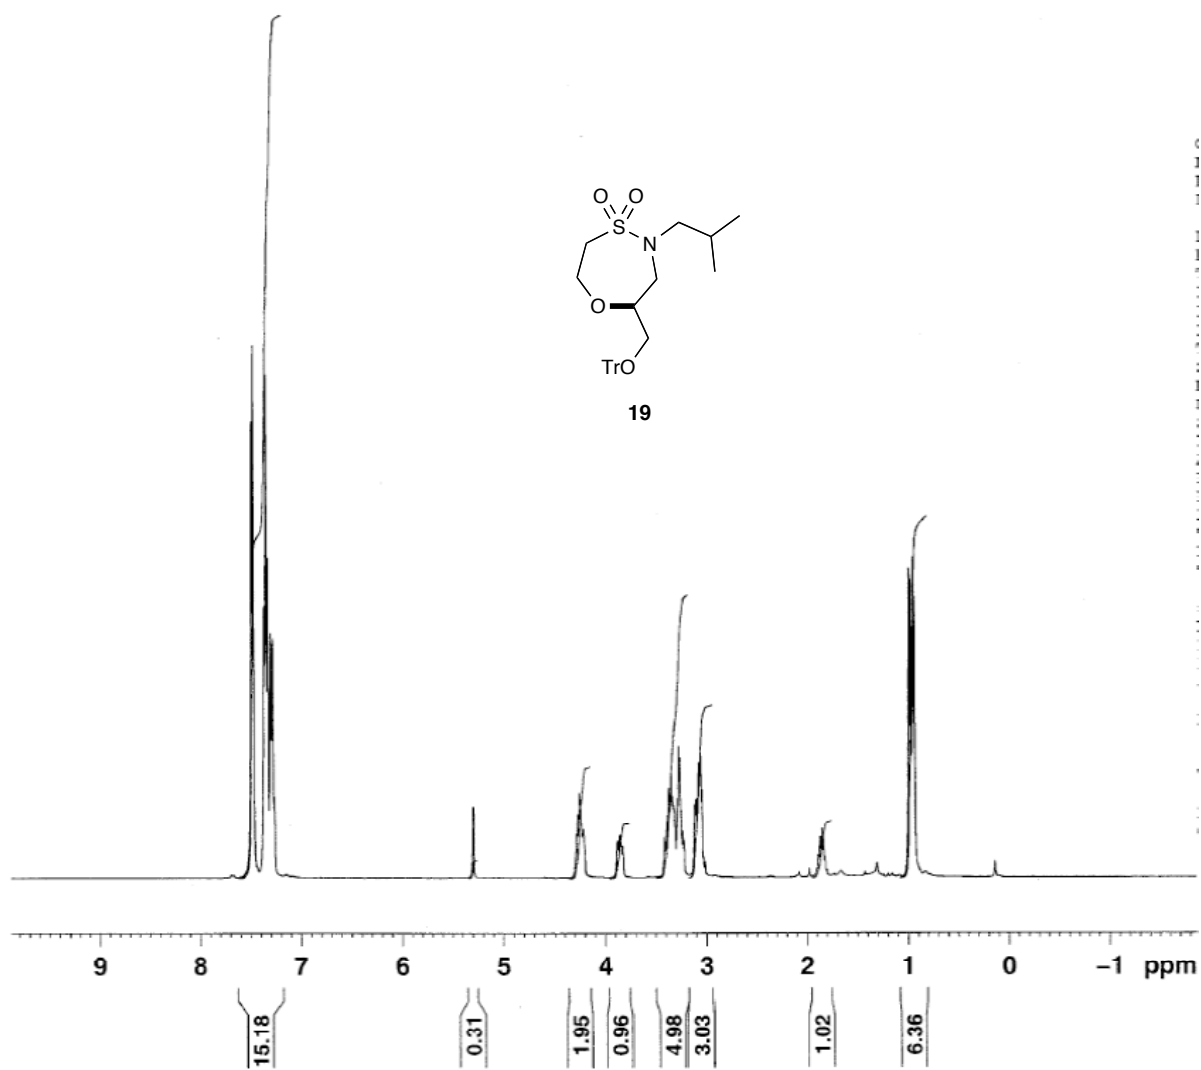

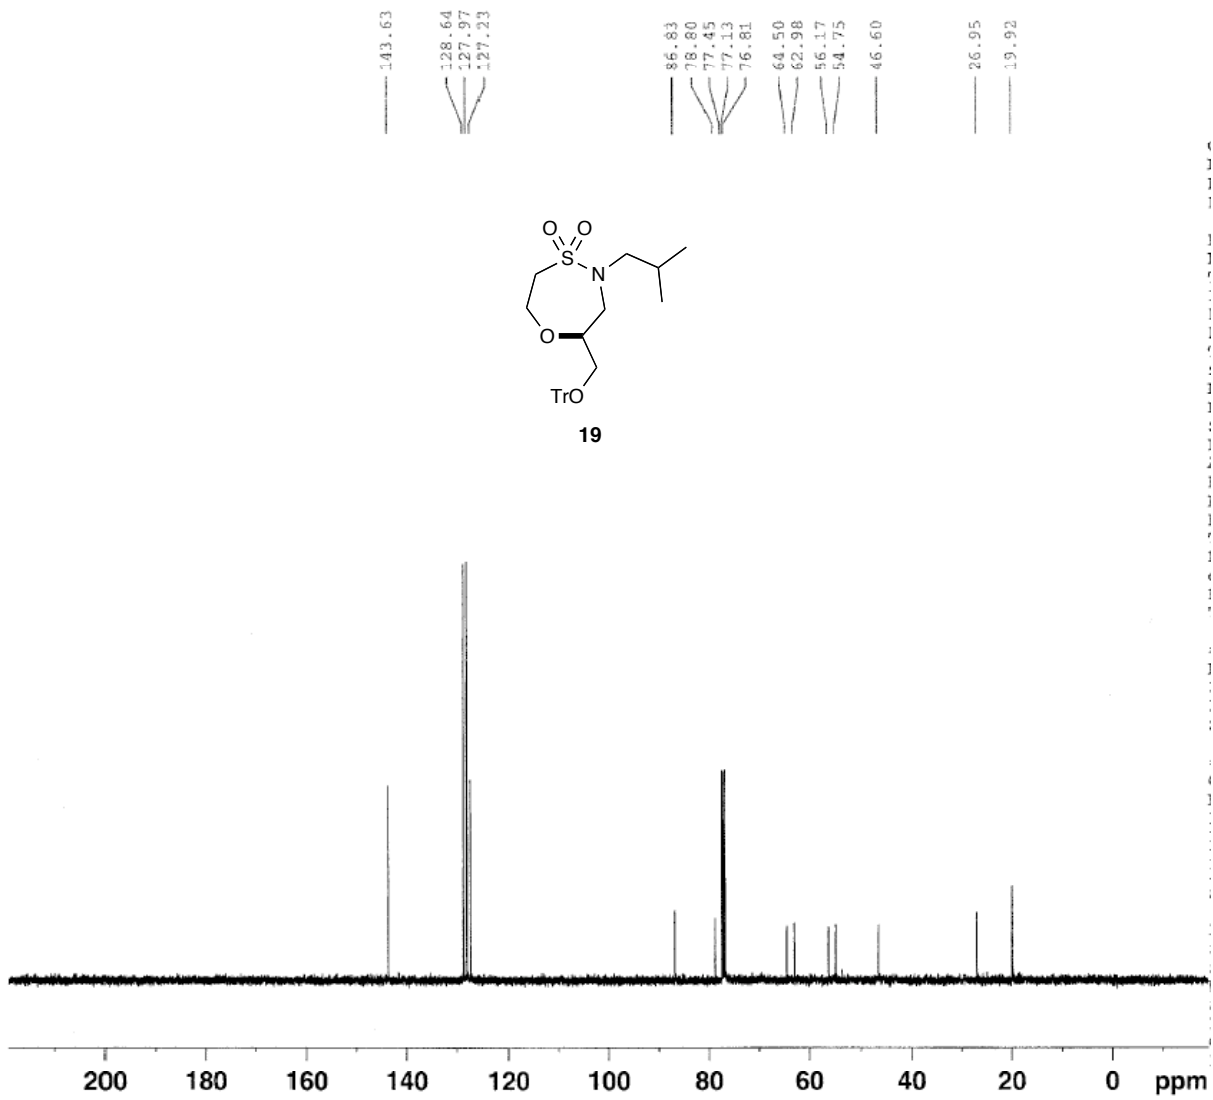

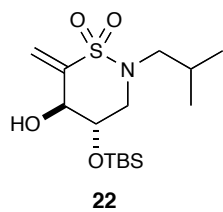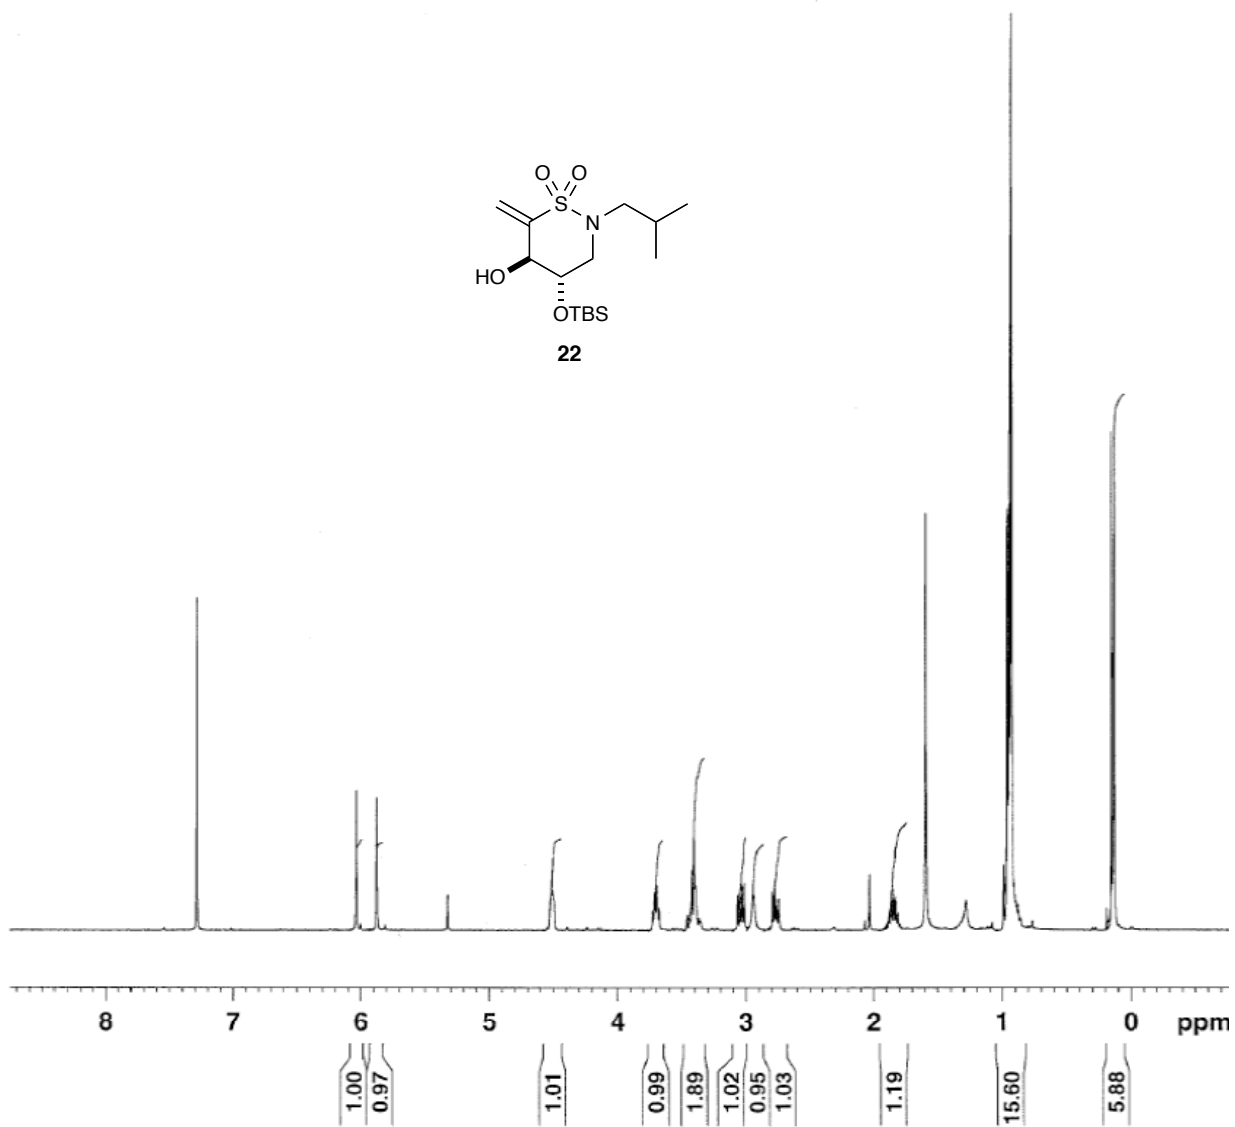

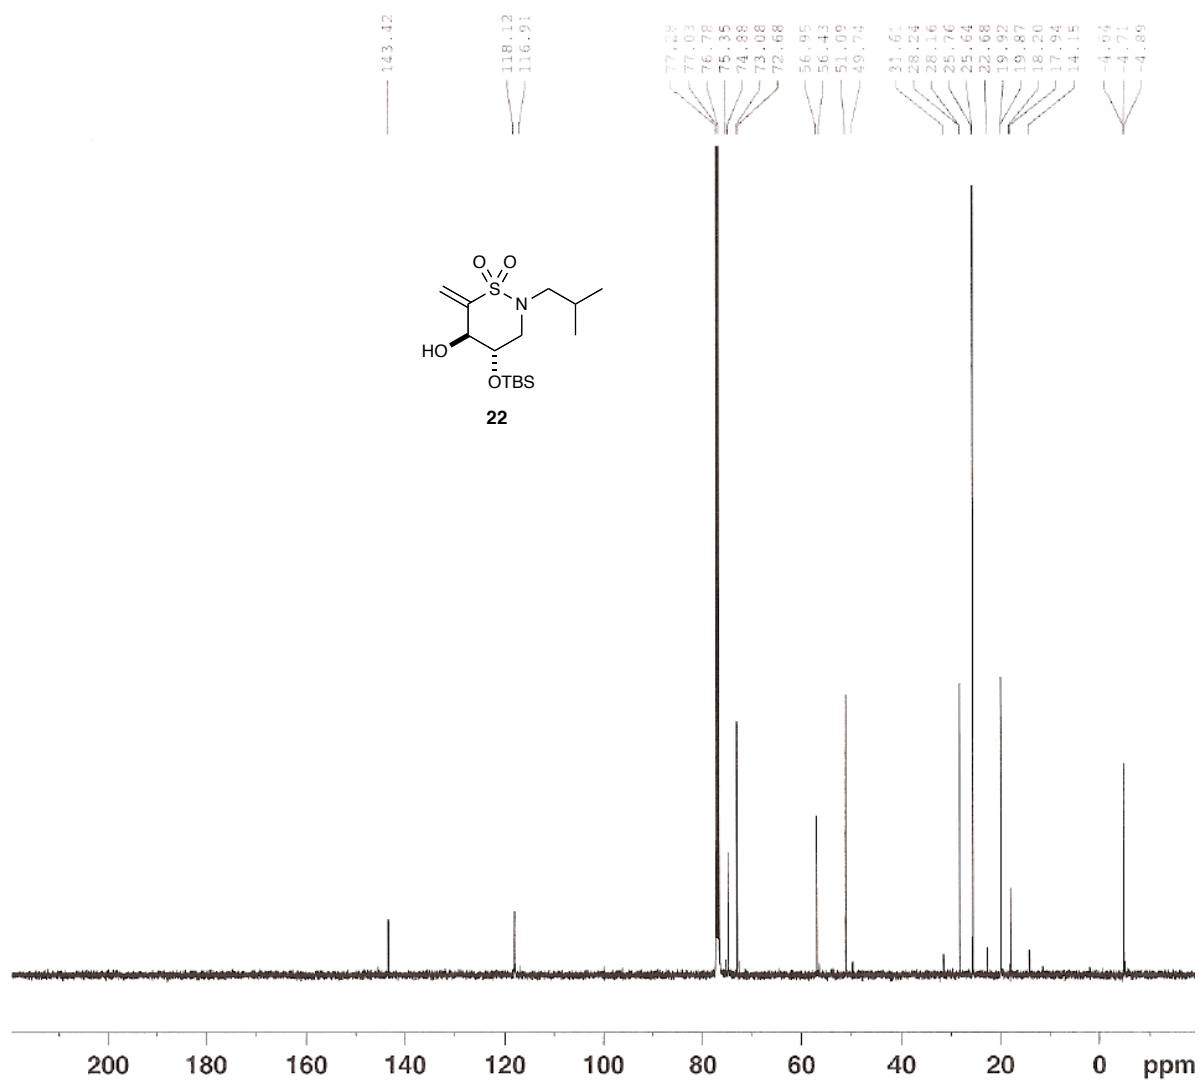

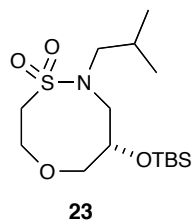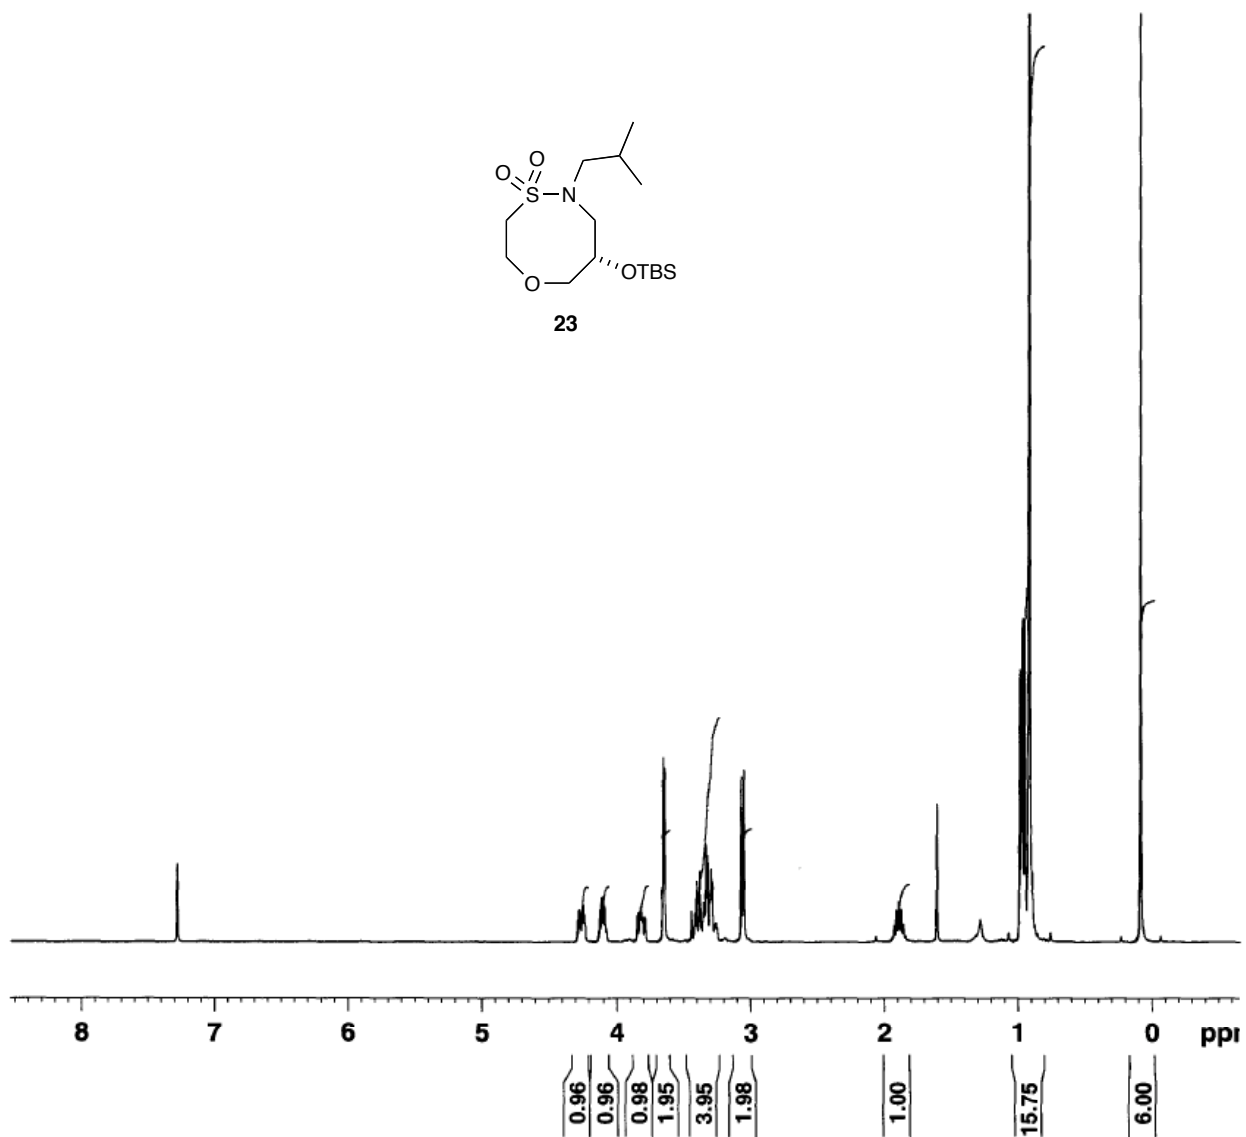

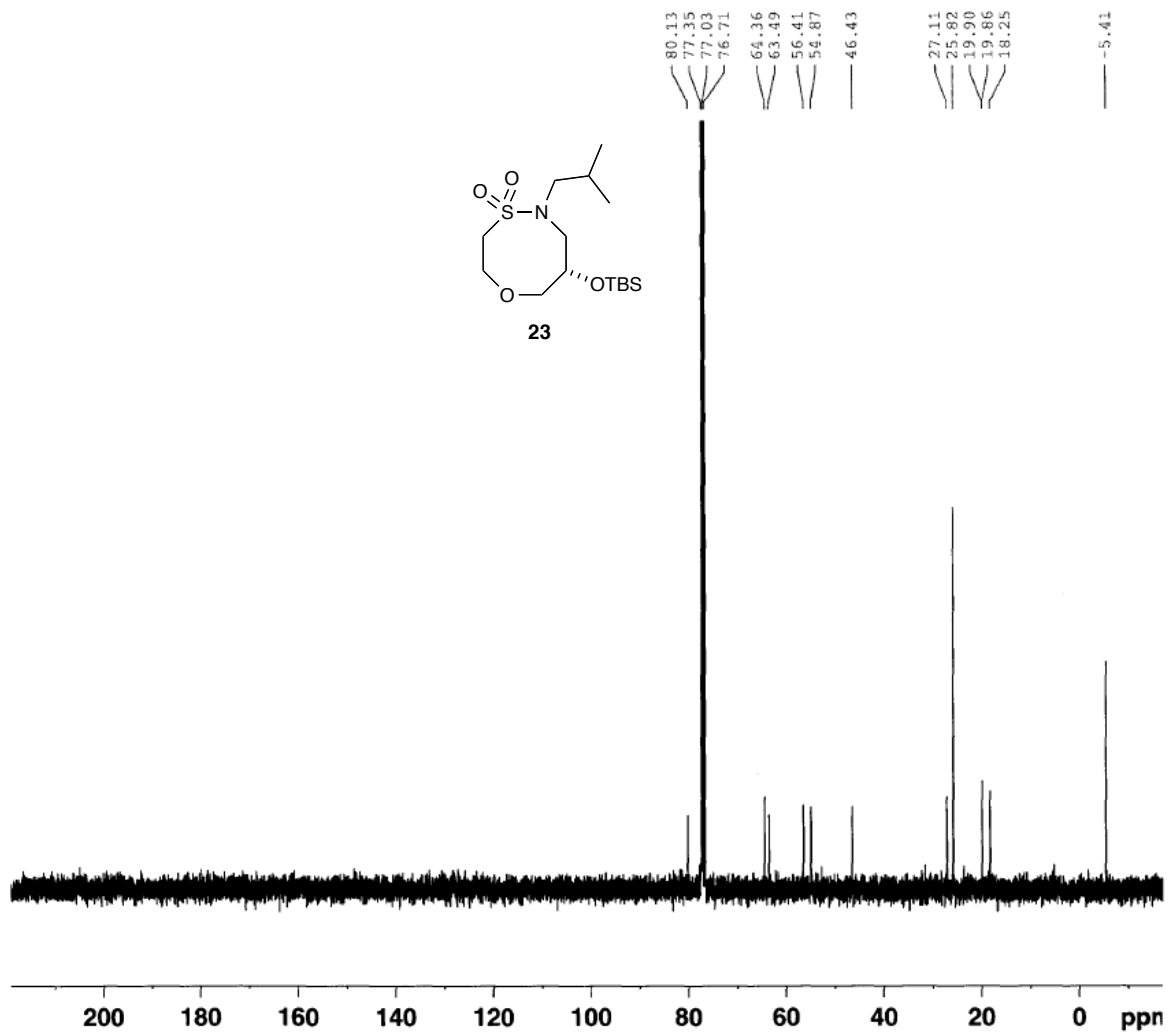



# 1D-NOE-difference of Compound 5b

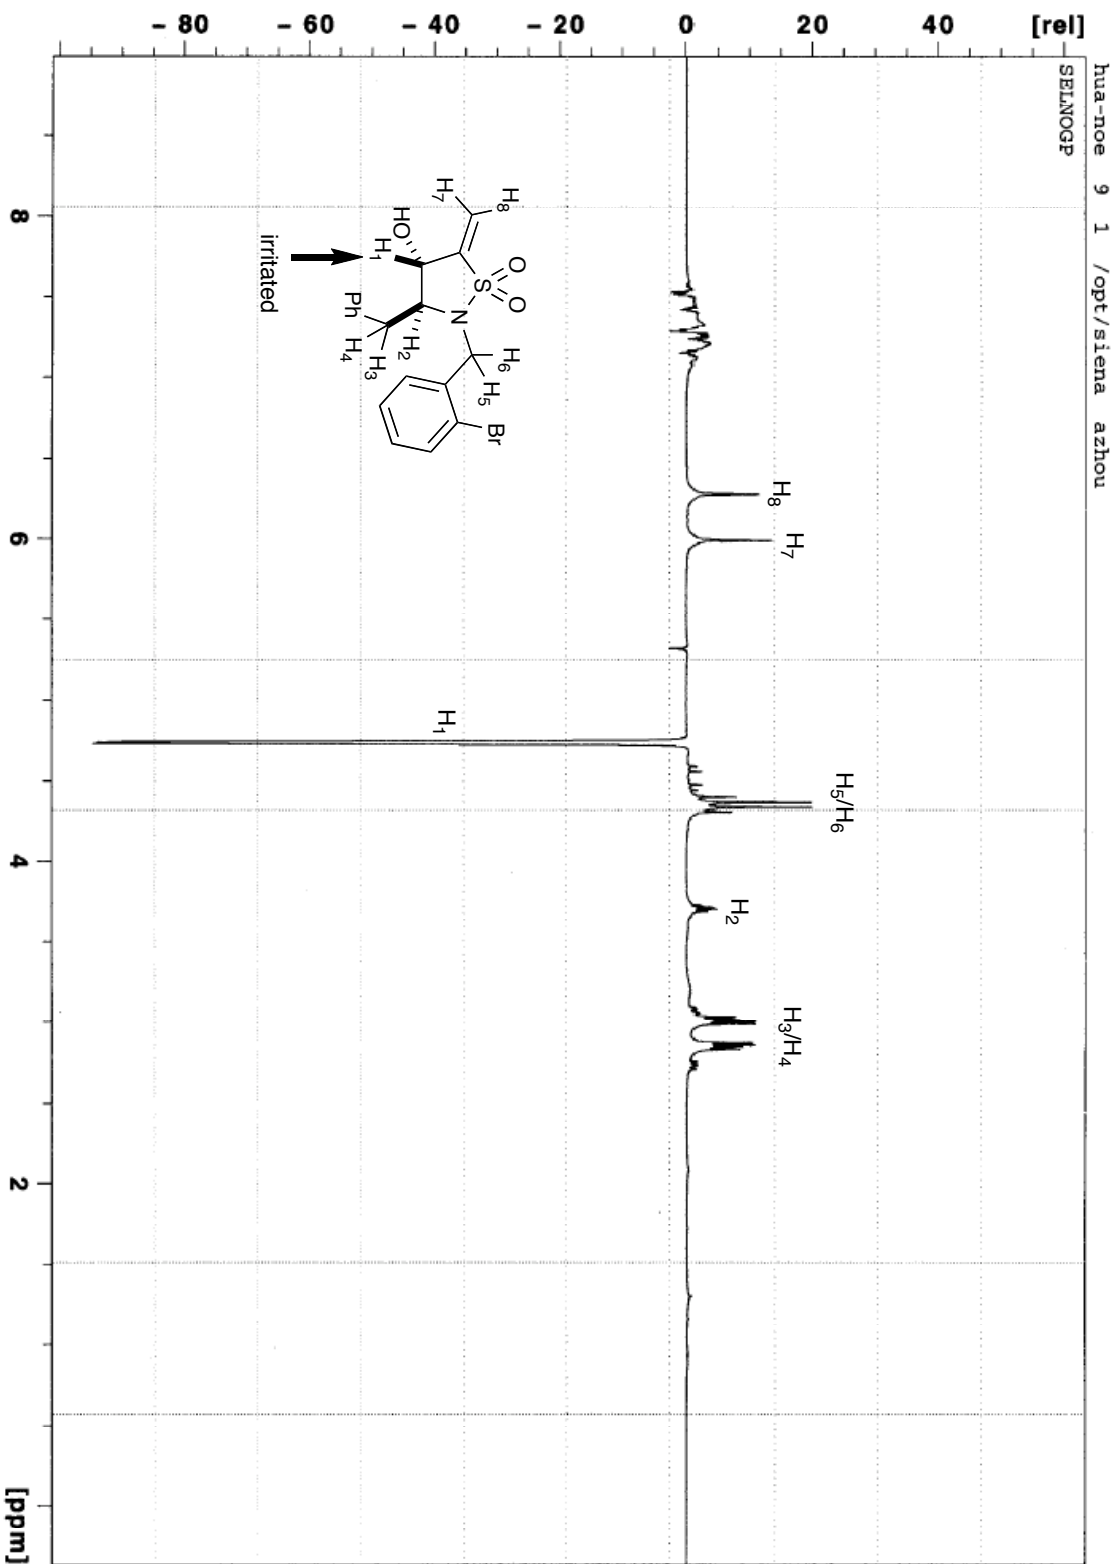

# COSY of Compound 5b

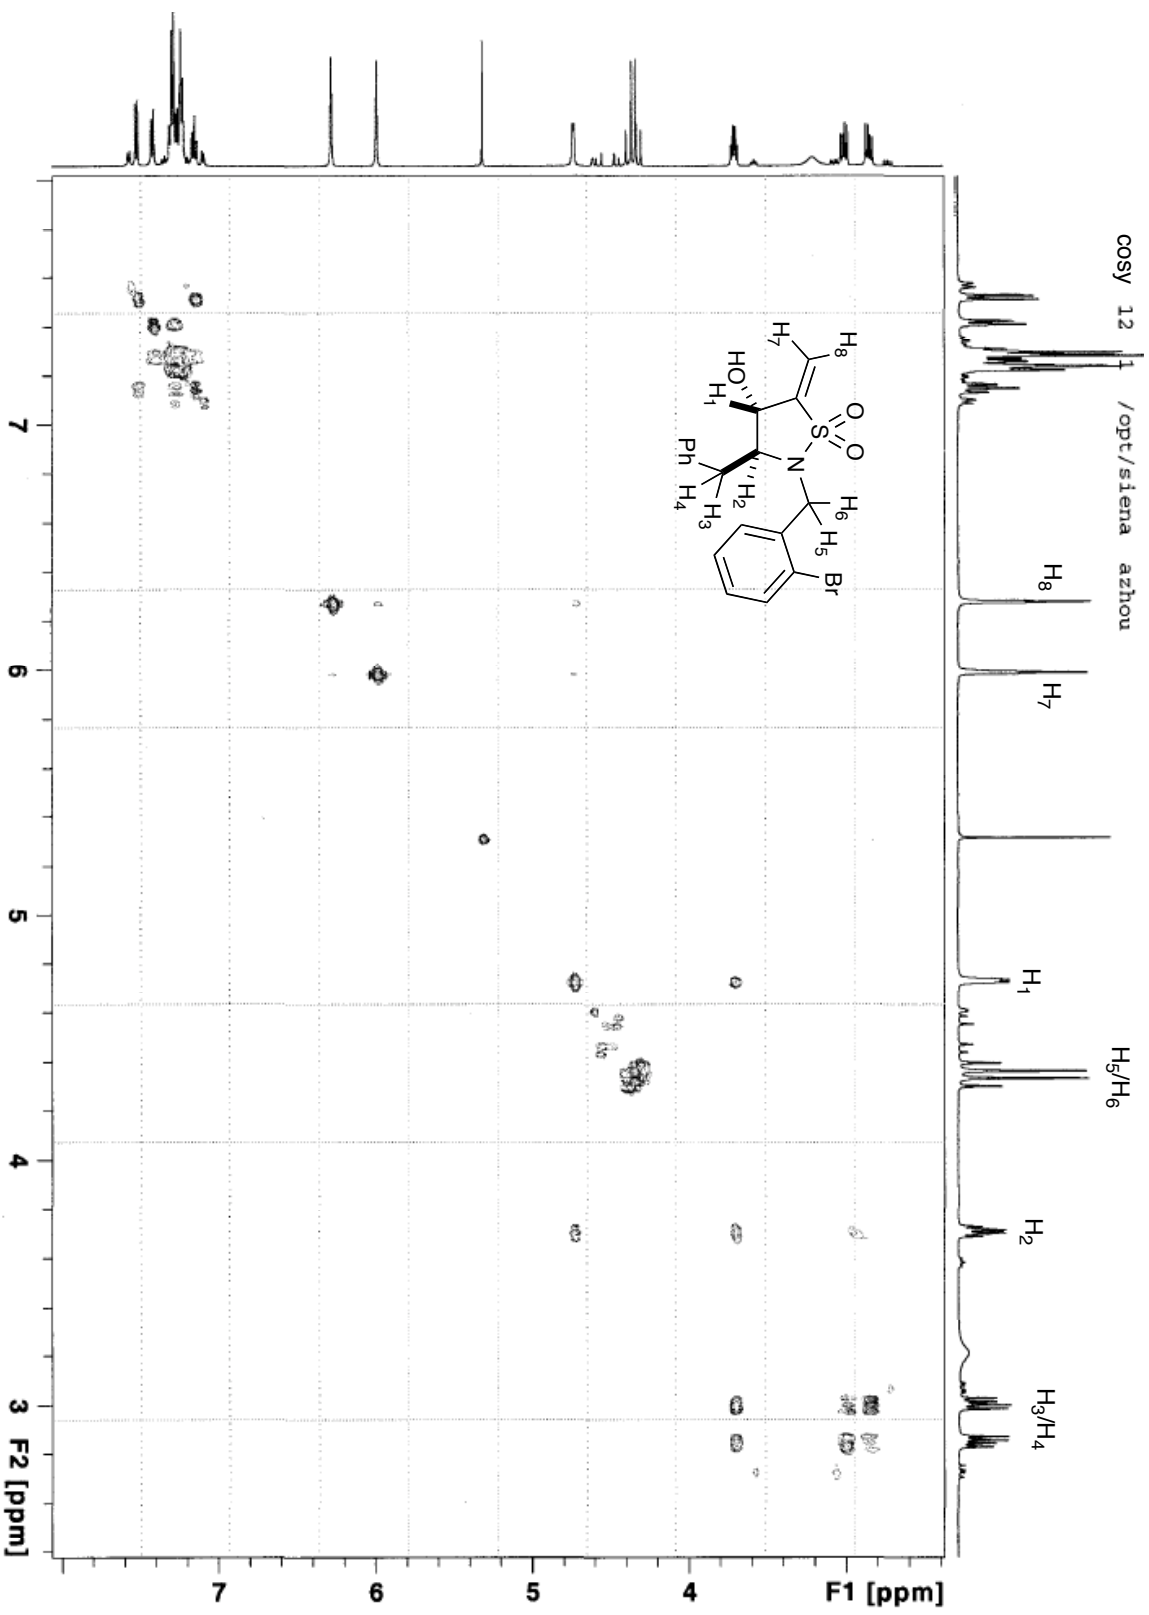

# NOESY of Compound 10

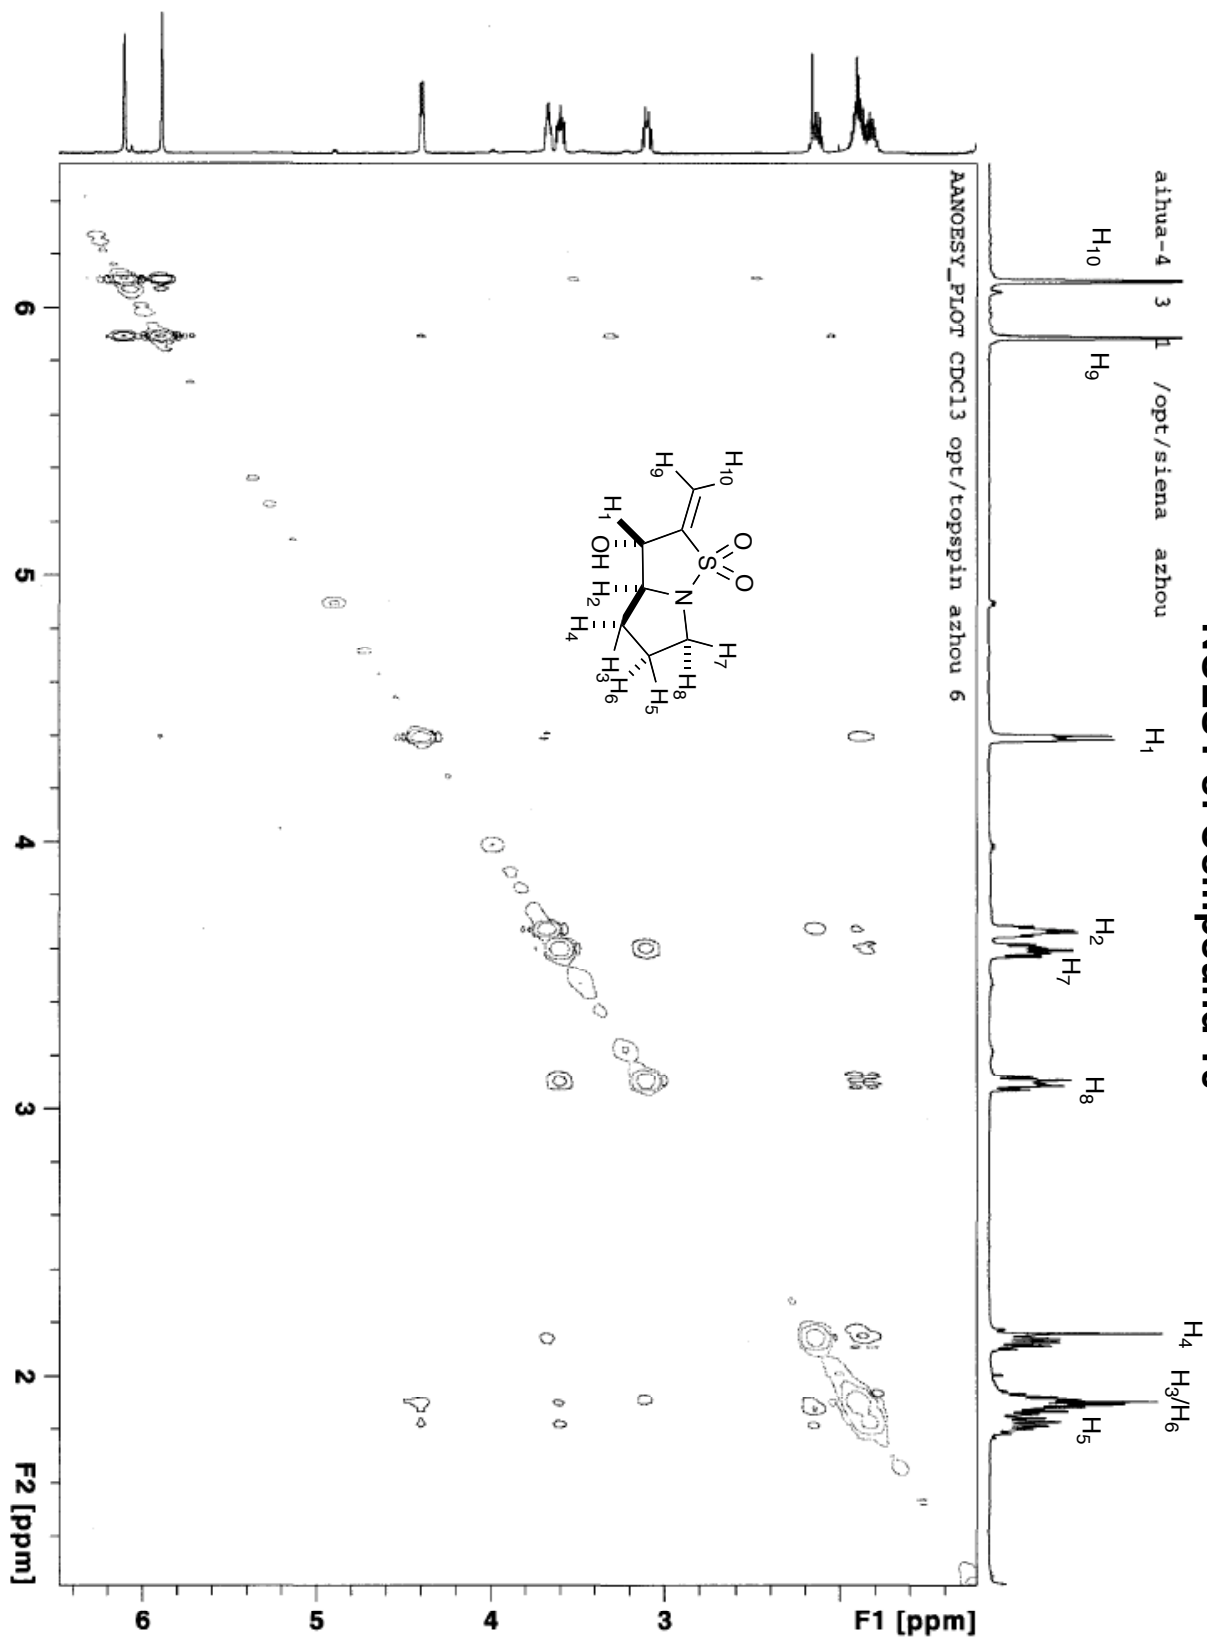

# COSY of Compound 10

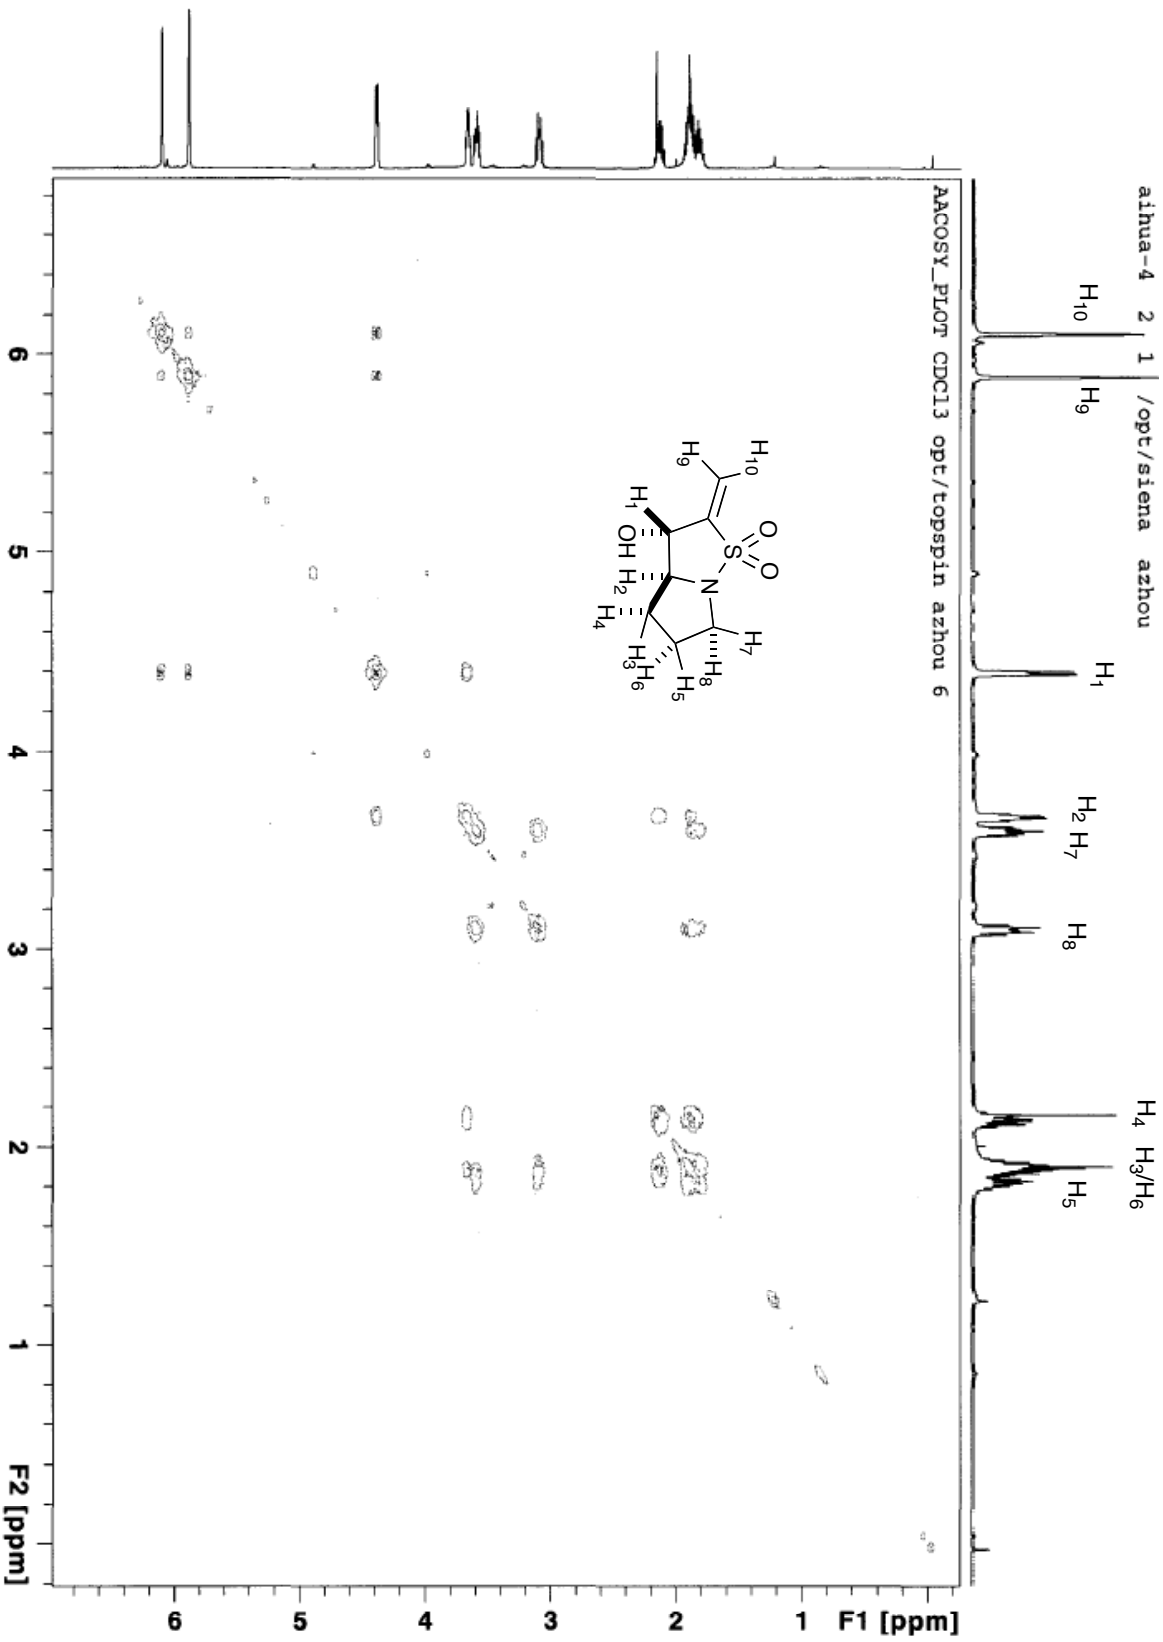

# COSY of Compound 15

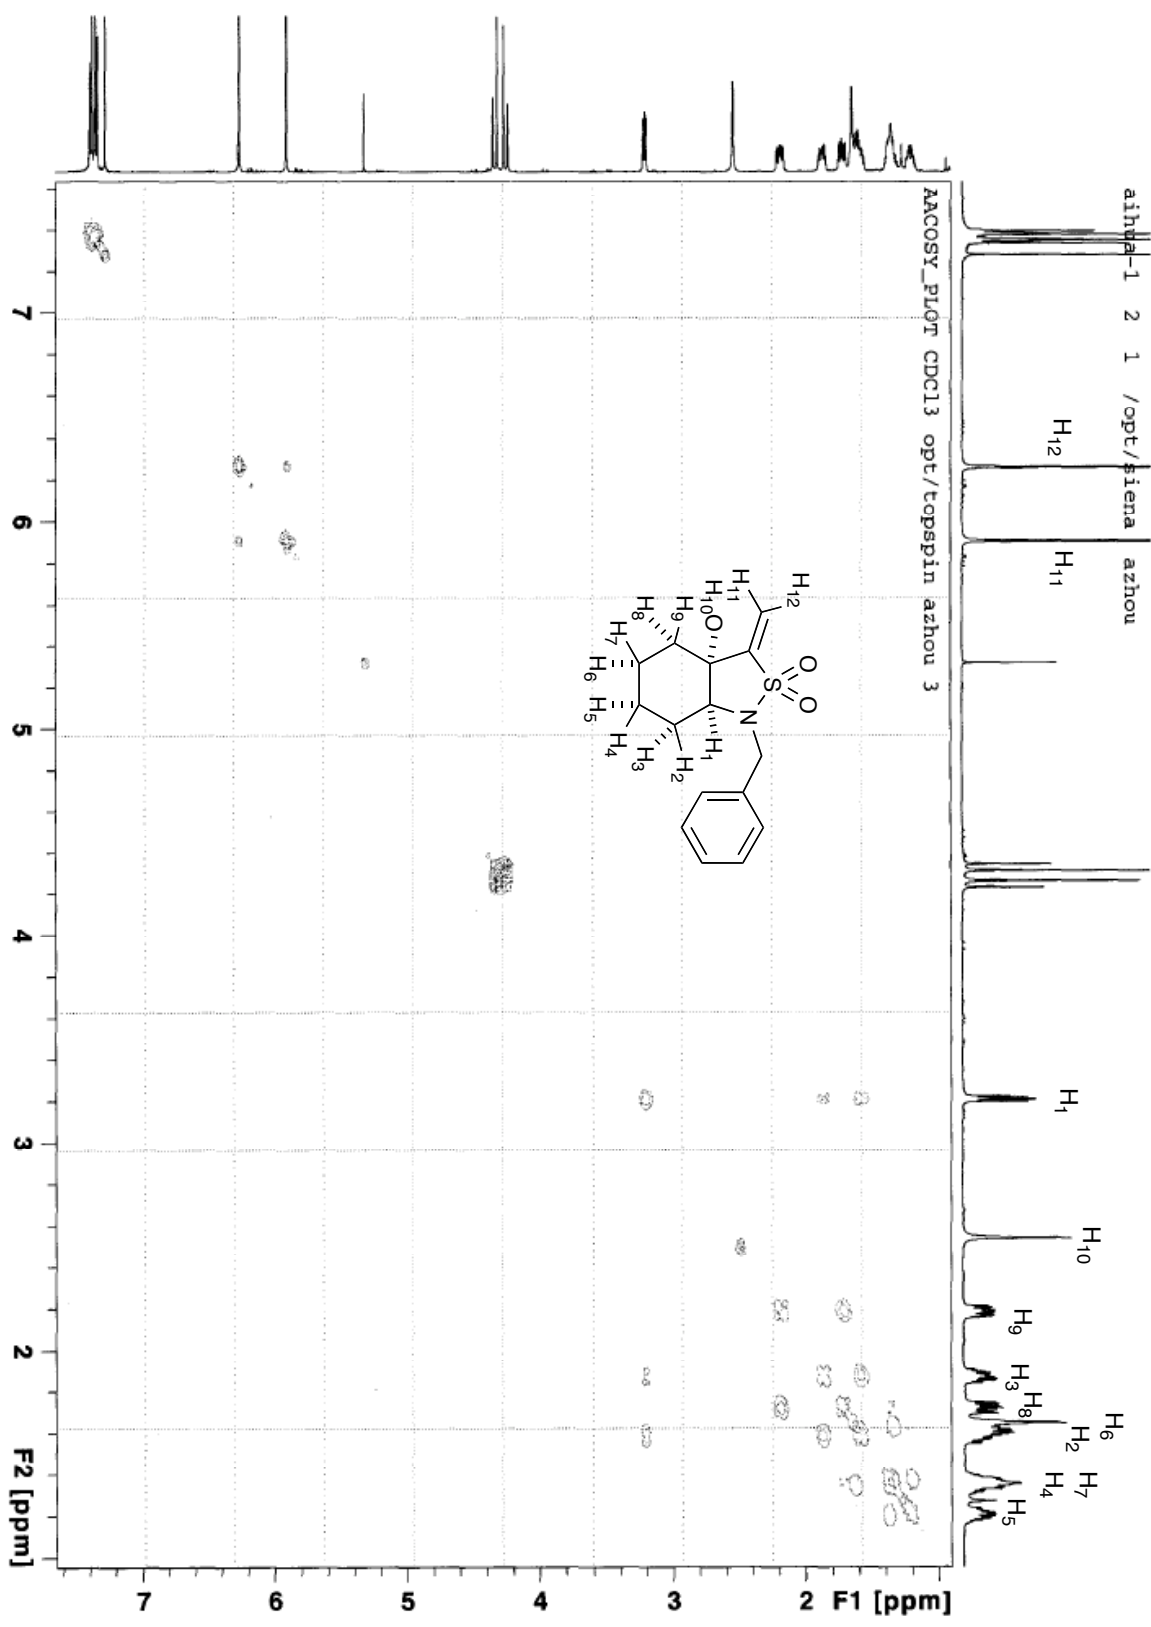

# NOESY of Compound 15

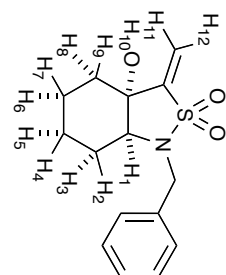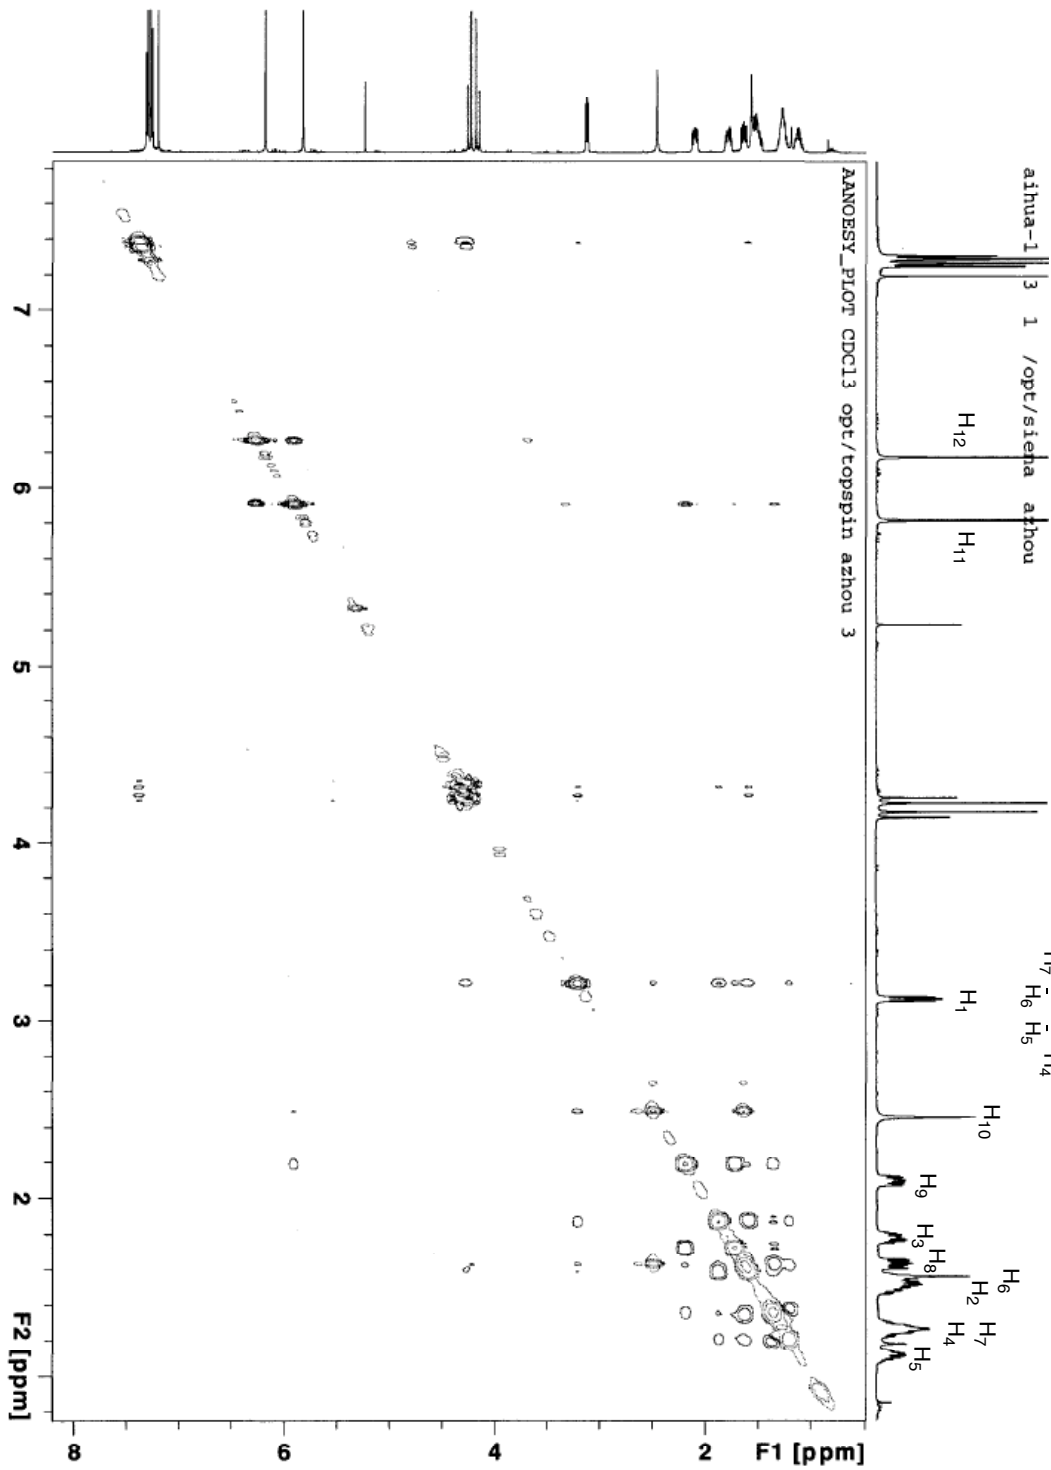

# NOESY of Compound 22 (Benzene-d<sub>6</sub> was used as a solvent)

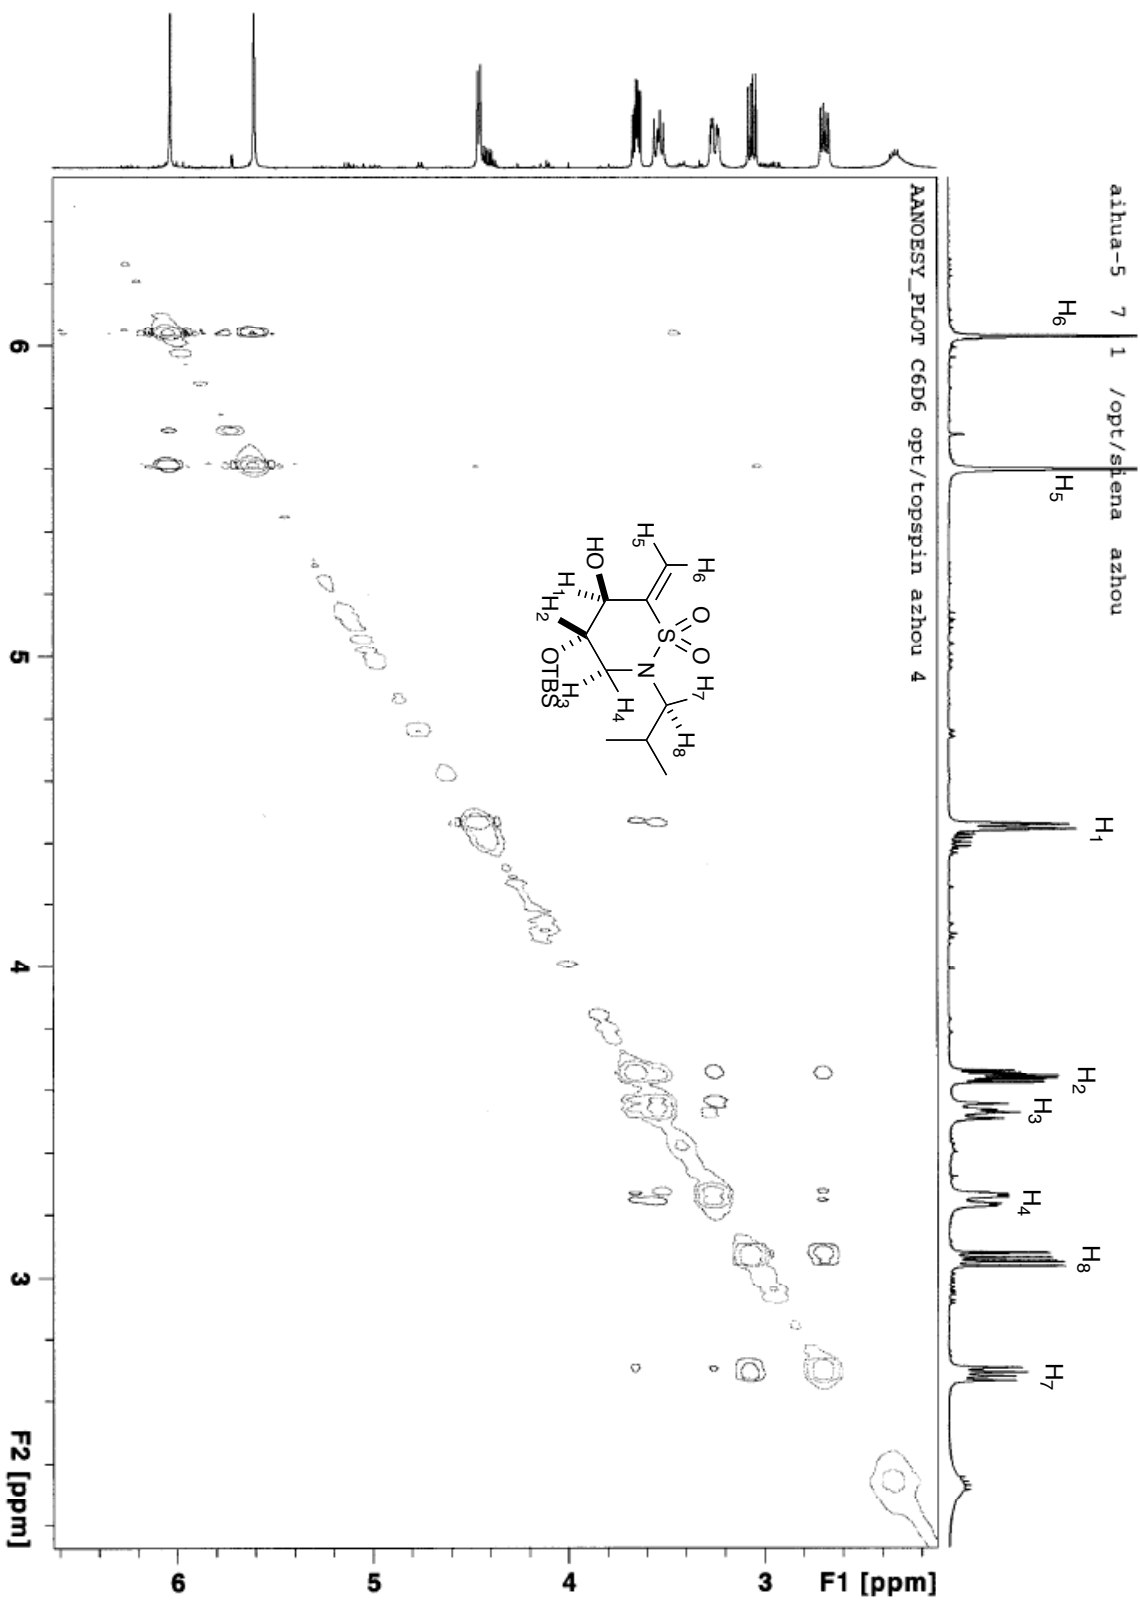

# COSY of Compound 22 (benzene-d<sub>6</sub> was used as a solvent)

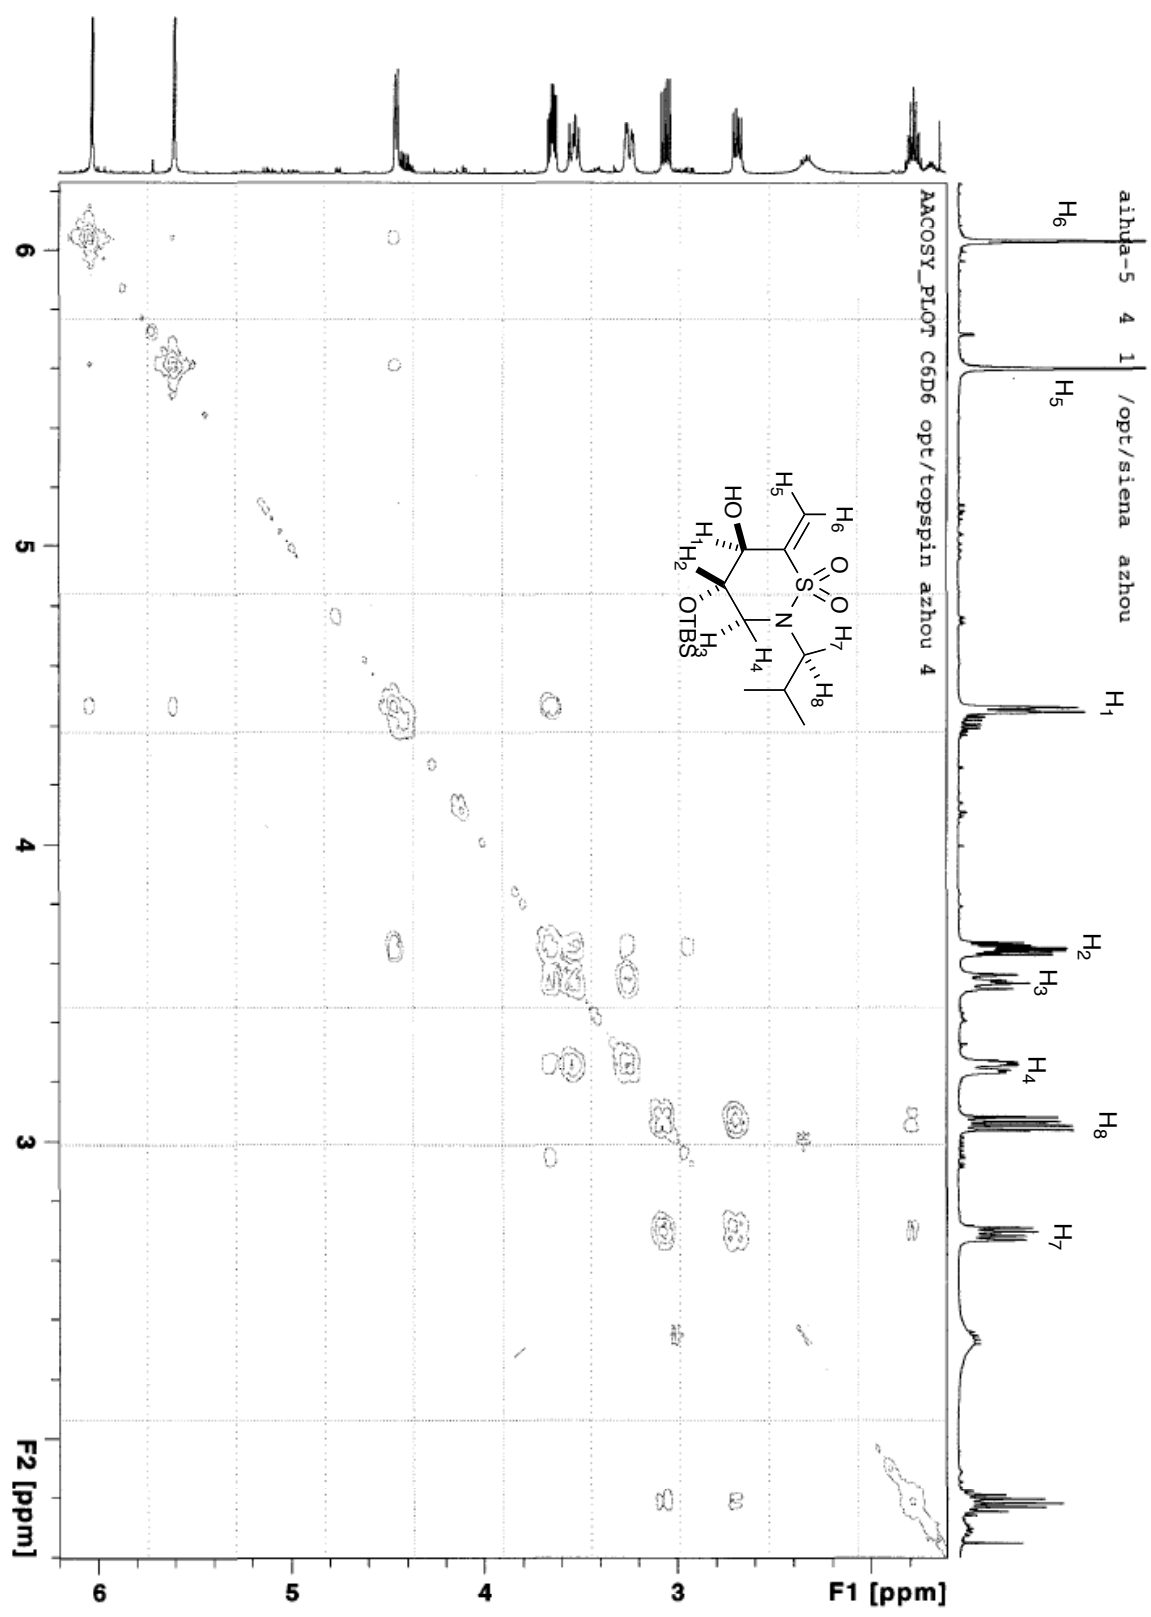

Supplement: NIHMS116098-supplement-Arrays.pdf [file NIHMS116098-supplement-Arrays.pdf]
